# Supplementary material for: Typical and atypical language brain organization based on intrinsic connectivity and multitask functional asymmetries
Source: eLife journal article supplement (doi:10.7554/elife.58722), 2020-10-16
Supplement: supp [file elife-58722-supp-v1.zip]

Archive with 21 entries (21 files):
- elife_poa_e58722_Figure_1_source_data_1.txt
- elife_poa_e58722_Figure_1_source_data_2.txt
- elife_poa_e58722_Figure_2_source_data_1.txt
- elife_poa_e58722_Figure_2_source_data_2.txt
- elife_poa_e58722_Figure_3_source_data_1.txt
- elife_poa_e58722_Figure_3_source_data_2.txt
- elife_poa_e58722_Figure_4_source_data_1.txt
- elife_poa_e58722_Figure_4_source_data_2.txt
- elife_poa_e58722_Figure_5_source_data_1.txt
- elife_poa_e58722_Figure_5_source_data_2.txt
- elife_poa_e58722_Figure_6_source_data_1.txt
- elife_poa_e58722_Figure_6_source_data_2.txt
- elife_poa_e58722_Table_1_source_data_1.txt
- elife_poa_e58722_Table_1_source_data_2.txt
- elife_poa_e58722_Table_2_source_data_1.txt
- elife_poa_e58722_Table_2_source_data_2.txt
- elife_poa_e58722_Table_3_source_data_1.txt
- elife_poa_e58722_Table_3_source_data_2.txt
- elife_poa_e58722_Table_4_source_data_1.txt
- elife_poa_e58722_Table_4_source_data_2.txt
- elife_poa_e58722_Transparent_Reporting_File.pdf
