# Supplementary material for: Typical and atypical language brain organization based on intrinsic connectivity and multitask functional asymmetries
Source: eLife journal article supplement (doi:10.7554/elife.58722), 2020-10-16
Supplement: supp [file elife-58722-supp-v1.zip › elife_poa_e58722_Figure_1_source_data_1.txt]

ID	MP	DISSOCIATIONS_2categories	Classif_MMHC	Task	Level	BOLD_Asym
1	RH	CONGRUENT	TYP_MILD	LISN	sentCORE	0.186
1	RH	CONGRUENT	TYP_MILD	LISN	sentHUBS	0.297
1	RH	CONGRUENT	TYP_MILD	PROD	sentCORE	0.292
1	RH	CONGRUENT	TYP_MILD	PROD	sentHUBS	0.372
1	RH	CONGRUENT	TYP_MILD	READ	sentCORE	0.063
1	RH	CONGRUENT	TYP_MILD	READ	sentHUBS	0.039
2	LH	CONGRUENT	TYP_MILD	LISN	sentCORE	0.307
2	LH	CONGRUENT	TYP_MILD	LISN	sentHUBS	0.466
2	LH	CONGRUENT	TYP_MILD	PROD	sentCORE	0.267
2	LH	CONGRUENT	TYP_MILD	PROD	sentHUBS	0.484
2	LH	CONGRUENT	TYP_MILD	READ	sentCORE	0.327
2	LH	CONGRUENT	TYP_MILD	READ	sentHUBS	0.484
3	RH	CONGRUENT	TYP_STRONG	LISN	sentCORE	0.257
3	RH	CONGRUENT	TYP_STRONG	LISN	sentHUBS	0.322
3	RH	CONGRUENT	TYP_STRONG	PROD	sentCORE	0.522
3	RH	CONGRUENT	TYP_STRONG	PROD	sentHUBS	0.58
3	RH	CONGRUENT	TYP_STRONG	READ	sentCORE	0.161
3	RH	CONGRUENT	TYP_STRONG	READ	sentHUBS	0.193
4	LH	CONGRUENT	TYP_MILD	LISN	sentCORE	0.054
4	LH	CONGRUENT	TYP_MILD	LISN	sentHUBS	0.077
4	LH	CONGRUENT	TYP_MILD	PROD	sentCORE	0.42
4	LH	CONGRUENT	TYP_MILD	PROD	sentHUBS	0.54
4	LH	CONGRUENT	TYP_MILD	READ	sentCORE	0.073
4	LH	CONGRUENT	TYP_MILD	READ	sentHUBS	0.201
5	RH	CONGRUENT	TYP_MILD	LISN	sentCORE	0.291
5	RH	CONGRUENT	TYP_MILD	LISN	sentHUBS	0.268
5	RH	CONGRUENT	TYP_MILD	PROD	sentCORE	0.32
5	RH	CONGRUENT	TYP_MILD	PROD	sentHUBS	0.184
5	RH	CONGRUENT	TYP_MILD	READ	sentCORE	0.236
5	RH	CONGRUENT	TYP_MILD	READ	sentHUBS	0.301
6	RH	CONGRUENT	TYP_STRONG	LISN	sentCORE	0.367
6	RH	CONGRUENT	TYP_STRONG	LISN	sentHUBS	0.45
6	RH	CONGRUENT	TYP_STRONG	PROD	sentCORE	0.534
6	RH	CONGRUENT	TYP_STRONG	PROD	sentHUBS	0.577
6	RH	CONGRUENT	TYP_STRONG	READ	sentCORE	0.566
6	RH	CONGRUENT	TYP_STRONG	READ	sentHUBS	0.66
7	LH	CONGRUENT	TYP_MILD	LISN	sentCORE	0.029
7	LH	CONGRUENT	TYP_MILD	LISN	sentHUBS	0.059
7	LH	CONGRUENT	TYP_MILD	PROD	sentCORE	0.202
7	LH	CONGRUENT	TYP_MILD	PROD	sentHUBS	0.294
7	LH	CONGRUENT	TYP_MILD	READ	sentCORE	0.208
7	LH	CONGRUENT	TYP_MILD	READ	sentHUBS	0.124
8	RH	CONGRUENT	TYP_MILD	LISN	sentCORE	0.12
8	RH	CONGRUENT	TYP_MILD	LISN	sentHUBS	0.242
8	RH	CONGRUENT	TYP_MILD	PROD	sentCORE	0.2
8	RH	CONGRUENT	TYP_MILD	PROD	sentHUBS	0.294
8	RH	CONGRUENT	TYP_MILD	READ	sentCORE	0.18
8	RH	CONGRUENT	TYP_MILD	READ	sentHUBS	0.316
9	RH	CONGRUENT	TYP_MILD	LISN	sentCORE	0.223
9	RH	CONGRUENT	TYP_MILD	LISN	sentHUBS	0.411
9	RH	CONGRUENT	TYP_MILD	PROD	sentCORE	0.208
9	RH	CONGRUENT	TYP_MILD	PROD	sentHUBS	0.667
9	RH	CONGRUENT	TYP_MILD	READ	sentCORE	0.201
9	RH	CONGRUENT	TYP_MILD	READ	sentHUBS	0.598
10	RH	CONGRUENT	TYP_MILD	LISN	sentCORE	0.15
10	RH	CONGRUENT	TYP_MILD	LISN	sentHUBS	-0.005
10	RH	CONGRUENT	TYP_MILD	PROD	sentCORE	0.327
10	RH	CONGRUENT	TYP_MILD	PROD	sentHUBS	0.249
10	RH	CONGRUENT	TYP_MILD	READ	sentCORE	0.387
10	RH	CONGRUENT	TYP_MILD	READ	sentHUBS	0.264
11	RH	CONGRUENT	TYP_STRONG	LISN	sentCORE	0.211
11	RH	CONGRUENT	TYP_STRONG	LISN	sentHUBS	0.355
11	RH	CONGRUENT	TYP_STRONG	PROD	sentCORE	0.397
11	RH	CONGRUENT	TYP_STRONG	PROD	sentHUBS	0.546
11	RH	CONGRUENT	TYP_STRONG	READ	sentCORE	0.338
11	RH	CONGRUENT	TYP_STRONG	READ	sentHUBS	0.342
12	RH	CONGRUENT	TYP_STRONG	LISN	sentCORE	0.38
12	RH	CONGRUENT	TYP_STRONG	LISN	sentHUBS	0.598
12	RH	CONGRUENT	TYP_STRONG	PROD	sentCORE	0.557
12	RH	CONGRUENT	TYP_STRONG	PROD	sentHUBS	0.635
12	RH	CONGRUENT	TYP_STRONG	READ	sentCORE	0.463
12	RH	CONGRUENT	TYP_STRONG	READ	sentHUBS	0.651
13	RH	CROSSED	ATYP	LISN	sentCORE	-0.002
13	RH	CROSSED	ATYP	LISN	sentHUBS	0.116
13	RH	CROSSED	ATYP	PROD	sentCORE	0.149
13	RH	CROSSED	ATYP	PROD	sentHUBS	0.234
13	RH	CROSSED	ATYP	READ	sentCORE	-0.106
13	RH	CROSSED	ATYP	READ	sentHUBS	-0.071
14	RH	CONGRUENT	TYP_MILD	LISN	sentCORE	0.069
14	RH	CONGRUENT	TYP_MILD	LISN	sentHUBS	0.079
14	RH	CONGRUENT	TYP_MILD	PROD	sentCORE	0.234
14	RH	CONGRUENT	TYP_MILD	PROD	sentHUBS	0.488
14	RH	CONGRUENT	TYP_MILD	READ	sentCORE	0.199
14	RH	CONGRUENT	TYP_MILD	READ	sentHUBS	0.201
15	RH	CONGRUENT	TYP_STRONG	LISN	sentCORE	0.568
15	RH	CONGRUENT	TYP_STRONG	LISN	sentHUBS	0.972
15	RH	CONGRUENT	TYP_STRONG	PROD	sentCORE	0.883
15	RH	CONGRUENT	TYP_STRONG	PROD	sentHUBS	1.232
15	RH	CONGRUENT	TYP_STRONG	READ	sentCORE	0.665
15	RH	CONGRUENT	TYP_STRONG	READ	sentHUBS	1.174
16	RH	CONGRUENT	TYP_MILD	LISN	sentCORE	0.404
16	RH	CONGRUENT	TYP_MILD	LISN	sentHUBS	0.477
16	RH	CONGRUENT	TYP_MILD	PROD	sentCORE	0.288
16	RH	CONGRUENT	TYP_MILD	PROD	sentHUBS	0.34
16	RH	CONGRUENT	TYP_MILD	READ	sentCORE	0.345
16	RH	CONGRUENT	TYP_MILD	READ	sentHUBS	0.294
17	RH	CONGRUENT	TYP_STRONG	LISN	sentCORE	0.443
17	RH	CONGRUENT	TYP_STRONG	LISN	sentHUBS	0.67
17	RH	CONGRUENT	TYP_STRONG	PROD	sentCORE	0.697
17	RH	CONGRUENT	TYP_STRONG	PROD	sentHUBS	0.915
17	RH	CONGRUENT	TYP_STRONG	READ	sentCORE	0.486
17	RH	CONGRUENT	TYP_STRONG	READ	sentHUBS	0.734
18	RH	CONGRUENT	TYP_STRONG	LISN	sentCORE	0.167
18	RH	CONGRUENT	TYP_STRONG	LISN	sentHUBS	0.309
18	RH	CONGRUENT	TYP_STRONG	PROD	sentCORE	0.901
18	RH	CONGRUENT	TYP_STRONG	PROD	sentHUBS	1.422
18	RH	CONGRUENT	TYP_STRONG	READ	sentCORE	0.145
18	RH	CONGRUENT	TYP_STRONG	READ	sentHUBS	0.565
19	RH	CONGRUENT	TYP_MILD	LISN	sentCORE	0.198
19	RH	CONGRUENT	TYP_MILD	LISN	sentHUBS	0.356
19	RH	CONGRUENT	TYP_MILD	PROD	sentCORE	0.143
19	RH	CONGRUENT	TYP_MILD	PROD	sentHUBS	0.297
19	RH	CONGRUENT	TYP_MILD	READ	sentCORE	0.117
19	RH	CONGRUENT	TYP_MILD	READ	sentHUBS	0.26
20	RH	CONGRUENT	TYP_MILD	LISN	sentCORE	0.131
20	RH	CONGRUENT	TYP_MILD	LISN	sentHUBS	0.262
20	RH	CONGRUENT	TYP_MILD	PROD	sentCORE	0.373
20	RH	CONGRUENT	TYP_MILD	PROD	sentHUBS	0.594
20	RH	CONGRUENT	TYP_MILD	READ	sentCORE	0.246
20	RH	CONGRUENT	TYP_MILD	READ	sentHUBS	0.503
21	RH	CONGRUENT	TYP_MILD	LISN	sentCORE	0.184
21	RH	CONGRUENT	TYP_MILD	LISN	sentHUBS	0.38
21	RH	CONGRUENT	TYP_MILD	PROD	sentCORE	0.227
21	RH	CONGRUENT	TYP_MILD	PROD	sentHUBS	0.501
21	RH	CONGRUENT	TYP_MILD	READ	sentCORE	0.275
21	RH	CONGRUENT	TYP_MILD	READ	sentHUBS	0.536
22	RH	CONGRUENT	TYP_STRONG	LISN	sentCORE	0.299
22	RH	CONGRUENT	TYP_STRONG	LISN	sentHUBS	0.296
22	RH	CONGRUENT	TYP_STRONG	PROD	sentCORE	0.662
22	RH	CONGRUENT	TYP_STRONG	PROD	sentHUBS	0.781
22	RH	CONGRUENT	TYP_STRONG	READ	sentCORE	0.727
22	RH	CONGRUENT	TYP_STRONG	READ	sentHUBS	0.648
23	RH	CONGRUENT	TYP_MILD	LISN	sentCORE	0.129
23	RH	CONGRUENT	TYP_MILD	LISN	sentHUBS	0.115
23	RH	CONGRUENT	TYP_MILD	PROD	sentCORE	0.186
23	RH	CONGRUENT	TYP_MILD	PROD	sentHUBS	0.204
23	RH	CONGRUENT	TYP_MILD	READ	sentCORE	0.089
23	RH	CONGRUENT	TYP_MILD	READ	sentHUBS	0.103
24	RH	CONGRUENT	TYP_MILD	LISN	sentCORE	0.16
24	RH	CONGRUENT	TYP_MILD	LISN	sentHUBS	0.27
24	RH	CONGRUENT	TYP_MILD	PROD	sentCORE	0.17
24	RH	CONGRUENT	TYP_MILD	PROD	sentHUBS	0.251
24	RH	CONGRUENT	TYP_MILD	READ	sentCORE	0.025
24	RH	CONGRUENT	TYP_MILD	READ	sentHUBS	0.2
25	RH	CONGRUENT	TYP_STRONG	LISN	sentCORE	0.386
25	RH	CONGRUENT	TYP_STRONG	LISN	sentHUBS	0.581
25	RH	CONGRUENT	TYP_STRONG	PROD	sentCORE	0.529
25	RH	CONGRUENT	TYP_STRONG	PROD	sentHUBS	0.634
25	RH	CONGRUENT	TYP_STRONG	READ	sentCORE	0.325
25	RH	CONGRUENT	TYP_STRONG	READ	sentHUBS	0.529
26	RH	CONGRUENT	TYP_STRONG	LISN	sentCORE	0.359
26	RH	CONGRUENT	TYP_STRONG	LISN	sentHUBS	0.527
26	RH	CONGRUENT	TYP_STRONG	PROD	sentCORE	0.372
26	RH	CONGRUENT	TYP_STRONG	PROD	sentHUBS	0.858
26	RH	CONGRUENT	TYP_STRONG	READ	sentCORE	0.228
26	RH	CONGRUENT	TYP_STRONG	READ	sentHUBS	0.401
27	RH	CONGRUENT	TYP_MILD	LISN	sentCORE	0.144
27	RH	CONGRUENT	TYP_MILD	LISN	sentHUBS	0.166
27	RH	CONGRUENT	TYP_MILD	PROD	sentCORE	0.2
27	RH	CONGRUENT	TYP_MILD	PROD	sentHUBS	0.09
27	RH	CONGRUENT	TYP_MILD	READ	sentCORE	0.134
27	RH	CONGRUENT	TYP_MILD	READ	sentHUBS	0.13
28	RH	CROSSED	TYP_MILD	LISN	sentCORE	0.053
28	RH	CROSSED	TYP_MILD	LISN	sentHUBS	0.058
28	RH	CROSSED	TYP_MILD	PROD	sentCORE	0.584
28	RH	CROSSED	TYP_MILD	PROD	sentHUBS	0.613
28	RH	CROSSED	TYP_MILD	READ	sentCORE	-0.066
28	RH	CROSSED	TYP_MILD	READ	sentHUBS	-0.025
29	LH	CONGRUENT	TYP_MILD	LISN	sentCORE	0.101
29	LH	CONGRUENT	TYP_MILD	LISN	sentHUBS	0.281
29	LH	CONGRUENT	TYP_MILD	PROD	sentCORE	0.155
29	LH	CONGRUENT	TYP_MILD	PROD	sentHUBS	0.232
29	LH	CONGRUENT	TYP_MILD	READ	sentCORE	0.219
29	LH	CONGRUENT	TYP_MILD	READ	sentHUBS	0.445
30	RH	CONGRUENT	TYP_MILD	LISN	sentCORE	0.066
30	RH	CONGRUENT	TYP_MILD	LISN	sentHUBS	0.056
30	RH	CONGRUENT	TYP_MILD	PROD	sentCORE	0.338
30	RH	CONGRUENT	TYP_MILD	PROD	sentHUBS	0.391
30	RH	CONGRUENT	TYP_MILD	READ	sentCORE	0.023
30	RH	CONGRUENT	TYP_MILD	READ	sentHUBS	0.023
31	RH	CONGRUENT	TYP_MILD	LISN	sentCORE	0.163
31	RH	CONGRUENT	TYP_MILD	LISN	sentHUBS	0.277
31	RH	CONGRUENT	TYP_MILD	PROD	sentCORE	0.254
31	RH	CONGRUENT	TYP_MILD	PROD	sentHUBS	0.527
31	RH	CONGRUENT	TYP_MILD	READ	sentCORE	0.21
31	RH	CONGRUENT	TYP_MILD	READ	sentHUBS	0.105
32	RH	CONGRUENT	TYP_MILD	LISN	sentCORE	0.189
32	RH	CONGRUENT	TYP_MILD	LISN	sentHUBS	0.403
32	RH	CONGRUENT	TYP_MILD	PROD	sentCORE	0.31
32	RH	CONGRUENT	TYP_MILD	PROD	sentHUBS	0.346
32	RH	CONGRUENT	TYP_MILD	READ	sentCORE	0.212
32	RH	CONGRUENT	TYP_MILD	READ	sentHUBS	0.415
33	RH	CONGRUENT	TYP_MILD	LISN	sentCORE	0.077
33	RH	CONGRUENT	TYP_MILD	LISN	sentHUBS	-0.023
33	RH	CONGRUENT	TYP_MILD	PROD	sentCORE	0.195
33	RH	CONGRUENT	TYP_MILD	PROD	sentHUBS	0.039
33	RH	CONGRUENT	TYP_MILD	READ	sentCORE	0.093
33	RH	CONGRUENT	TYP_MILD	READ	sentHUBS	0.237
34	RH	CONGRUENT	TYP_STRONG	LISN	sentCORE	0.074
34	RH	CONGRUENT	TYP_STRONG	LISN	sentHUBS	0.093
34	RH	CONGRUENT	TYP_STRONG	PROD	sentCORE	0.375
34	RH	CONGRUENT	TYP_STRONG	PROD	sentHUBS	0.506
34	RH	CONGRUENT	TYP_STRONG	READ	sentCORE	0.408
34	RH	CONGRUENT	TYP_STRONG	READ	sentHUBS	0.444
35	LH	CONGRUENT	TYP_STRONG	LISN	sentCORE	0.441
35	LH	CONGRUENT	TYP_STRONG	LISN	sentHUBS	0.613
35	LH	CONGRUENT	TYP_STRONG	PROD	sentCORE	0.735
35	LH	CONGRUENT	TYP_STRONG	PROD	sentHUBS	1.139
35	LH	CONGRUENT	TYP_STRONG	READ	sentCORE	0.386
35	LH	CONGRUENT	TYP_STRONG	READ	sentHUBS	0.601
36	LH	CONGRUENT	TYP_STRONG	LISN	sentCORE	0.323
36	LH	CONGRUENT	TYP_STRONG	LISN	sentHUBS	0.445
36	LH	CONGRUENT	TYP_STRONG	PROD	sentCORE	0.365
36	LH	CONGRUENT	TYP_STRONG	PROD	sentHUBS	0.598
36	LH	CONGRUENT	TYP_STRONG	READ	sentCORE	0.292
36	LH	CONGRUENT	TYP_STRONG	READ	sentHUBS	0.342
37	LH	CONGRUENT	TYP_STRONG	LISN	sentCORE	0.201
37	LH	CONGRUENT	TYP_STRONG	LISN	sentHUBS	0.323
37	LH	CONGRUENT	TYP_STRONG	PROD	sentCORE	0.718
37	LH	CONGRUENT	TYP_STRONG	PROD	sentHUBS	0.762
37	LH	CONGRUENT	TYP_STRONG	READ	sentCORE	0.144
37	LH	CONGRUENT	TYP_STRONG	READ	sentHUBS	-0.027
38	LH	CROSSED	ATYP	LISN	sentCORE	-0.328
38	LH	CROSSED	ATYP	LISN	sentHUBS	-0.513
38	LH	CROSSED	ATYP	PROD	sentCORE	0.014
38	LH	CROSSED	ATYP	PROD	sentHUBS	0.169
38	LH	CROSSED	ATYP	READ	sentCORE	-0.41
38	LH	CROSSED	ATYP	READ	sentHUBS	-0.812
39	LH	CROSSED	ATYP	LISN	sentCORE	-0.328
39	LH	CROSSED	ATYP	LISN	sentHUBS	-0.645
39	LH	CROSSED	ATYP	PROD	sentCORE	0.245
39	LH	CROSSED	ATYP	PROD	sentHUBS	0.209
39	LH	CROSSED	ATYP	READ	sentCORE	-0.08
39	LH	CROSSED	ATYP	READ	sentHUBS	-0.273
40	LH	CROSSED	TYP_MILD	LISN	sentCORE	0.057
40	LH	CROSSED	TYP_MILD	LISN	sentHUBS	0.023
40	LH	CROSSED	TYP_MILD	PROD	sentCORE	0.193
40	LH	CROSSED	TYP_MILD	PROD	sentHUBS	0.332
40	LH	CROSSED	TYP_MILD	READ	sentCORE	0.099
40	LH	CROSSED	TYP_MILD	READ	sentHUBS	-0.075
41	LH	CONGRUENT	TYP_STRONG	LISN	sentCORE	0.478
41	LH	CONGRUENT	TYP_STRONG	LISN	sentHUBS	0.616
41	LH	CONGRUENT	TYP_STRONG	PROD	sentCORE	0.65
41	LH	CONGRUENT	TYP_STRONG	PROD	sentHUBS	0.494
41	LH	CONGRUENT	TYP_STRONG	READ	sentCORE	0.481
41	LH	CONGRUENT	TYP_STRONG	READ	sentHUBS	0.438
42	LH	CONGRUENT	TYP_MILD	LISN	sentCORE	0.263
42	LH	CONGRUENT	TYP_MILD	LISN	sentHUBS	0.551
42	LH	CONGRUENT	TYP_MILD	PROD	sentCORE	0.366
42	LH	CONGRUENT	TYP_MILD	PROD	sentHUBS	0.635
42	LH	CONGRUENT	TYP_MILD	READ	sentCORE	0.286
42	LH	CONGRUENT	TYP_MILD	READ	sentHUBS	0.526
43	LH	CONGRUENT	TYP_MILD	LISN	sentCORE	0.226
43	LH	CONGRUENT	TYP_MILD	LISN	sentHUBS	0.235
43	LH	CONGRUENT	TYP_MILD	PROD	sentCORE	0.503
43	LH	CONGRUENT	TYP_MILD	PROD	sentHUBS	0.558
43	LH	CONGRUENT	TYP_MILD	READ	sentCORE	0.383
43	LH	CONGRUENT	TYP_MILD	READ	sentHUBS	0.448
44	LH	CONGRUENT	ATYP	LISN	sentCORE	-0.399
44	LH	CONGRUENT	ATYP	LISN	sentHUBS	-0.482
44	LH	CONGRUENT	ATYP	PROD	sentCORE	-0.314
44	LH	CONGRUENT	ATYP	PROD	sentHUBS	-0.39
44	LH	CONGRUENT	ATYP	READ	sentCORE	-0.285
44	LH	CONGRUENT	ATYP	READ	sentHUBS	-0.683
45	RH	CONGRUENT	TYP_MILD	LISN	sentCORE	0.113
45	RH	CONGRUENT	TYP_MILD	LISN	sentHUBS	0.088
45	RH	CONGRUENT	TYP_MILD	PROD	sentCORE	0.155
45	RH	CONGRUENT	TYP_MILD	PROD	sentHUBS	0.33
45	RH	CONGRUENT	TYP_MILD	READ	sentCORE	0.06
45	RH	CONGRUENT	TYP_MILD	READ	sentHUBS	0.133
46	LH	CROSSED	TYP_STRONG	LISN	sentCORE	-0.053
46	LH	CROSSED	TYP_STRONG	LISN	sentHUBS	0.107
46	LH	CROSSED	TYP_STRONG	PROD	sentCORE	0.363
46	LH	CROSSED	TYP_STRONG	PROD	sentHUBS	0.582
46	LH	CROSSED	TYP_STRONG	READ	sentCORE	0.13
46	LH	CROSSED	TYP_STRONG	READ	sentHUBS	0.35
47	LH	CONGRUENT	TYP_STRONG	LISN	sentCORE	0.175
47	LH	CONGRUENT	TYP_STRONG	LISN	sentHUBS	0.547
47	LH	CONGRUENT	TYP_STRONG	PROD	sentCORE	0.783
47	LH	CONGRUENT	TYP_STRONG	PROD	sentHUBS	1.364
47	LH	CONGRUENT	TYP_STRONG	READ	sentCORE	0.407
47	LH	CONGRUENT	TYP_STRONG	READ	sentHUBS	0.917
48	LH	CONGRUENT	TYP_MILD	LISN	sentCORE	0.014
48	LH	CONGRUENT	TYP_MILD	LISN	sentHUBS	0.106
48	LH	CONGRUENT	TYP_MILD	PROD	sentCORE	0.531
48	LH	CONGRUENT	TYP_MILD	PROD	sentHUBS	0.612
48	LH	CONGRUENT	TYP_MILD	READ	sentCORE	0.198
48	LH	CONGRUENT	TYP_MILD	READ	sentHUBS	0.267
49	LH	CROSSED	TYP_MILD	LISN	sentCORE	0.207
49	LH	CROSSED	TYP_MILD	LISN	sentHUBS	-0.054
49	LH	CROSSED	TYP_MILD	PROD	sentCORE	0.438
49	LH	CROSSED	TYP_MILD	PROD	sentHUBS	0.328
49	LH	CROSSED	TYP_MILD	READ	sentCORE	0.165
49	LH	CROSSED	TYP_MILD	READ	sentHUBS	-0.091
50	LH	CONGRUENT	TYP_MILD	LISN	sentCORE	0.19
50	LH	CONGRUENT	TYP_MILD	LISN	sentHUBS	0.551
50	LH	CONGRUENT	TYP_MILD	PROD	sentCORE	0.395
50	LH	CONGRUENT	TYP_MILD	PROD	sentHUBS	0.487
50	LH	CONGRUENT	TYP_MILD	READ	sentCORE	0.109
50	LH	CONGRUENT	TYP_MILD	READ	sentHUBS	0.234
51	LH	CONGRUENT	TYP_STRONG	LISN	sentCORE	0.421
51	LH	CONGRUENT	TYP_STRONG	LISN	sentHUBS	0.705
51	LH	CONGRUENT	TYP_STRONG	PROD	sentCORE	0.42
51	LH	CONGRUENT	TYP_STRONG	PROD	sentHUBS	0.693
51	LH	CONGRUENT	TYP_STRONG	READ	sentCORE	0.203
51	LH	CONGRUENT	TYP_STRONG	READ	sentHUBS	0.469
52	LH	CONGRUENT	TYP_STRONG	LISN	sentCORE	0.464
52	LH	CONGRUENT	TYP_STRONG	LISN	sentHUBS	0.44
52	LH	CONGRUENT	TYP_STRONG	PROD	sentCORE	0.681
52	LH	CONGRUENT	TYP_STRONG	PROD	sentHUBS	0.719
52	LH	CONGRUENT	TYP_STRONG	READ	sentCORE	0.51
52	LH	CONGRUENT	TYP_STRONG	READ	sentHUBS	0.451
53	LH	CONGRUENT	TYP_MILD	LISN	sentCORE	0.158
53	LH	CONGRUENT	TYP_MILD	LISN	sentHUBS	0.245
53	LH	CONGRUENT	TYP_MILD	PROD	sentCORE	0.275
53	LH	CONGRUENT	TYP_MILD	PROD	sentHUBS	0.289
53	LH	CONGRUENT	TYP_MILD	READ	sentCORE	0.227
53	LH	CONGRUENT	TYP_MILD	READ	sentHUBS	0.388
54	LH	CONGRUENT	TYP_MILD	LISN	sentCORE	0.251
54	LH	CONGRUENT	TYP_MILD	LISN	sentHUBS	0.23
54	LH	CONGRUENT	TYP_MILD	PROD	sentCORE	0.401
54	LH	CONGRUENT	TYP_MILD	PROD	sentHUBS	0.394
54	LH	CONGRUENT	TYP_MILD	READ	sentCORE	0.327
54	LH	CONGRUENT	TYP_MILD	READ	sentHUBS	0.394
55	LH	CONGRUENT	TYP_MILD	LISN	sentCORE	0.135
55	LH	CONGRUENT	TYP_MILD	LISN	sentHUBS	0.151
55	LH	CONGRUENT	TYP_MILD	PROD	sentCORE	0.415
55	LH	CONGRUENT	TYP_MILD	PROD	sentHUBS	0.481
55	LH	CONGRUENT	TYP_MILD	READ	sentCORE	0.174
55	LH	CONGRUENT	TYP_MILD	READ	sentHUBS	0.263
56	LH	CONGRUENT	TYP_STRONG	LISN	sentCORE	0.028
56	LH	CONGRUENT	TYP_STRONG	LISN	sentHUBS	0.046
56	LH	CONGRUENT	TYP_STRONG	PROD	sentCORE	0.504
56	LH	CONGRUENT	TYP_STRONG	PROD	sentHUBS	0.648
56	LH	CONGRUENT	TYP_STRONG	READ	sentCORE	0.032
56	LH	CONGRUENT	TYP_STRONG	READ	sentHUBS	0.101
57	LH	CONGRUENT	TYP_STRONG	LISN	sentCORE	0.376
57	LH	CONGRUENT	TYP_STRONG	LISN	sentHUBS	0.767
57	LH	CONGRUENT	TYP_STRONG	PROD	sentCORE	0.615
57	LH	CONGRUENT	TYP_STRONG	PROD	sentHUBS	1.191
57	LH	CONGRUENT	TYP_STRONG	READ	sentCORE	0.377
57	LH	CONGRUENT	TYP_STRONG	READ	sentHUBS	1.1
58	LH	CONGRUENT	TYP_STRONG	LISN	sentCORE	0.288
58	LH	CONGRUENT	TYP_STRONG	LISN	sentHUBS	0.438
58	LH	CONGRUENT	TYP_STRONG	PROD	sentCORE	0.485
58	LH	CONGRUENT	TYP_STRONG	PROD	sentHUBS	0.979
58	LH	CONGRUENT	TYP_STRONG	READ	sentCORE	0.163
58	LH	CONGRUENT	TYP_STRONG	READ	sentHUBS	0.451
59	LH	CONGRUENT	ATYP	LISN	sentCORE	-0.096
59	LH	CONGRUENT	ATYP	LISN	sentHUBS	-0.223
59	LH	CONGRUENT	ATYP	PROD	sentCORE	-0.074
59	LH	CONGRUENT	ATYP	PROD	sentHUBS	-0.046
59	LH	CONGRUENT	ATYP	READ	sentCORE	-0.231
59	LH	CONGRUENT	ATYP	READ	sentHUBS	-0.526
60	LH	CONGRUENT	TYP_MILD	LISN	sentCORE	0.192
60	LH	CONGRUENT	TYP_MILD	LISN	sentHUBS	0.19
60	LH	CONGRUENT	TYP_MILD	PROD	sentCORE	0.388
60	LH	CONGRUENT	TYP_MILD	PROD	sentHUBS	0.363
60	LH	CONGRUENT	TYP_MILD	READ	sentCORE	0.124
60	LH	CONGRUENT	TYP_MILD	READ	sentHUBS	0.14
61	LH	CROSSED	ATYP	LISN	sentCORE	-0.247
61	LH	CROSSED	ATYP	LISN	sentHUBS	-0.483
61	LH	CROSSED	ATYP	PROD	sentCORE	0.062
61	LH	CROSSED	ATYP	PROD	sentHUBS	0.391
61	LH	CROSSED	ATYP	READ	sentCORE	-0.058
61	LH	CROSSED	ATYP	READ	sentHUBS	-0.283
62	LH	CONGRUENT	TYP_STRONG	LISN	sentCORE	0.195
62	LH	CONGRUENT	TYP_STRONG	LISN	sentHUBS	0.315
62	LH	CONGRUENT	TYP_STRONG	PROD	sentCORE	0.534
62	LH	CONGRUENT	TYP_STRONG	PROD	sentHUBS	0.761
62	LH	CONGRUENT	TYP_STRONG	READ	sentCORE	0.086
62	LH	CONGRUENT	TYP_STRONG	READ	sentHUBS	0.12
63	LH	CONGRUENT	TYP_STRONG	LISN	sentCORE	0.15
63	LH	CONGRUENT	TYP_STRONG	LISN	sentHUBS	0.391
63	LH	CONGRUENT	TYP_STRONG	PROD	sentCORE	0.382
63	LH	CONGRUENT	TYP_STRONG	PROD	sentHUBS	0.757
63	LH	CONGRUENT	TYP_STRONG	READ	sentCORE	0.567
63	LH	CONGRUENT	TYP_STRONG	READ	sentHUBS	1.011
64	LH	CONGRUENT	ATYP	LISN	sentCORE	-0.229
64	LH	CONGRUENT	ATYP	LISN	sentHUBS	-0.533
64	LH	CONGRUENT	ATYP	PROD	sentCORE	-0.182
64	LH	CONGRUENT	ATYP	PROD	sentHUBS	-0.256
64	LH	CONGRUENT	ATYP	READ	sentCORE	-0.303
64	LH	CONGRUENT	ATYP	READ	sentHUBS	-0.514
65	LH	CONGRUENT	TYP_STRONG	LISN	sentCORE	0.323
65	LH	CONGRUENT	TYP_STRONG	LISN	sentHUBS	0.411
65	LH	CONGRUENT	TYP_STRONG	PROD	sentCORE	0.548
65	LH	CONGRUENT	TYP_STRONG	PROD	sentHUBS	0.818
65	LH	CONGRUENT	TYP_STRONG	READ	sentCORE	0.303
65	LH	CONGRUENT	TYP_STRONG	READ	sentHUBS	0.475
66	LH	CROSSED	ATYP	LISN	sentCORE	-0.065
66	LH	CROSSED	ATYP	LISN	sentHUBS	-0.301
66	LH	CROSSED	ATYP	PROD	sentCORE	0.06
66	LH	CROSSED	ATYP	PROD	sentHUBS	0.099
66	LH	CROSSED	ATYP	READ	sentCORE	0.02
66	LH	CROSSED	ATYP	READ	sentHUBS	-0.232
67	LH	CONGRUENT	TYP_MILD	LISN	sentCORE	0.089
67	LH	CONGRUENT	TYP_MILD	LISN	sentHUBS	0.211
67	LH	CONGRUENT	TYP_MILD	PROD	sentCORE	0.226
67	LH	CONGRUENT	TYP_MILD	PROD	sentHUBS	0.115
67	LH	CONGRUENT	TYP_MILD	READ	sentCORE	0.174
67	LH	CONGRUENT	TYP_MILD	READ	sentHUBS	0.305
68	LH	CONGRUENT	TYP_STRONG	LISN	sentCORE	0.215
68	LH	CONGRUENT	TYP_STRONG	LISN	sentHUBS	0.505
68	LH	CONGRUENT	TYP_STRONG	PROD	sentCORE	0.394
68	LH	CONGRUENT	TYP_STRONG	PROD	sentHUBS	0.699
68	LH	CONGRUENT	TYP_STRONG	READ	sentCORE	0.311
68	LH	CONGRUENT	TYP_STRONG	READ	sentHUBS	0.623
69	LH	CONGRUENT	TYP_MILD	LISN	sentCORE	0.014
69	LH	CONGRUENT	TYP_MILD	LISN	sentHUBS	-0.007
69	LH	CONGRUENT	TYP_MILD	PROD	sentCORE	0.294
69	LH	CONGRUENT	TYP_MILD	PROD	sentHUBS	0.025
69	LH	CONGRUENT	TYP_MILD	READ	sentCORE	0.318
69	LH	CONGRUENT	TYP_MILD	READ	sentHUBS	0.343
70	LH	CONGRUENT	TYP_MILD	LISN	sentCORE	0.162
70	LH	CONGRUENT	TYP_MILD	LISN	sentHUBS	0.088
70	LH	CONGRUENT	TYP_MILD	PROD	sentCORE	0.229
70	LH	CONGRUENT	TYP_MILD	PROD	sentHUBS	0.365
70	LH	CONGRUENT	TYP_MILD	READ	sentCORE	0.246
70	LH	CONGRUENT	TYP_MILD	READ	sentHUBS	0.218
71	LH	CONGRUENT	TYP_MILD	LISN	sentCORE	0.132
71	LH	CONGRUENT	TYP_MILD	LISN	sentHUBS	0.038
71	LH	CONGRUENT	TYP_MILD	PROD	sentCORE	0.463
71	LH	CONGRUENT	TYP_MILD	PROD	sentHUBS	0.372
71	LH	CONGRUENT	TYP_MILD	READ	sentCORE	0.448
71	LH	CONGRUENT	TYP_MILD	READ	sentHUBS	0.327
72	LH	CONGRUENT	TYP_STRONG	LISN	sentCORE	0.267
72	LH	CONGRUENT	TYP_STRONG	LISN	sentHUBS	0.591
72	LH	CONGRUENT	TYP_STRONG	PROD	sentCORE	0.45
72	LH	CONGRUENT	TYP_STRONG	PROD	sentHUBS	0.596
72	LH	CONGRUENT	TYP_STRONG	READ	sentCORE	0.271
72	LH	CONGRUENT	TYP_STRONG	READ	sentHUBS	0.515
73	LH	CONGRUENT	TYP_MILD	LISN	sentCORE	0.205
73	LH	CONGRUENT	TYP_MILD	LISN	sentHUBS	0.326
73	LH	CONGRUENT	TYP_MILD	PROD	sentCORE	0.314
73	LH	CONGRUENT	TYP_MILD	PROD	sentHUBS	0.485
73	LH	CONGRUENT	TYP_MILD	READ	sentCORE	0.189
73	LH	CONGRUENT	TYP_MILD	READ	sentHUBS	0.226
74	LH	CONGRUENT	TYP_STRONG	LISN	sentCORE	0.263
74	LH	CONGRUENT	TYP_STRONG	LISN	sentHUBS	0.357
74	LH	CONGRUENT	TYP_STRONG	PROD	sentCORE	0.499
74	LH	CONGRUENT	TYP_STRONG	PROD	sentHUBS	0.68
74	LH	CONGRUENT	TYP_STRONG	READ	sentCORE	0.41
74	LH	CONGRUENT	TYP_STRONG	READ	sentHUBS	0.49
75	LH	CONGRUENT	TYP_MILD	LISN	sentCORE	0.272
75	LH	CONGRUENT	TYP_MILD	LISN	sentHUBS	0.318
75	LH	CONGRUENT	TYP_MILD	PROD	sentCORE	0.475
75	LH	CONGRUENT	TYP_MILD	PROD	sentHUBS	0.523
75	LH	CONGRUENT	TYP_MILD	READ	sentCORE	0.601
75	LH	CONGRUENT	TYP_MILD	READ	sentHUBS	0.595
76	LH	CONGRUENT	TYP_STRONG	LISN	sentCORE	0.364
76	LH	CONGRUENT	TYP_STRONG	LISN	sentHUBS	0.591
76	LH	CONGRUENT	TYP_STRONG	PROD	sentCORE	0.554
76	LH	CONGRUENT	TYP_STRONG	PROD	sentHUBS	1.046
76	LH	CONGRUENT	TYP_STRONG	READ	sentCORE	0.485
76	LH	CONGRUENT	TYP_STRONG	READ	sentHUBS	0.861
77	LH	CONGRUENT	TYP_MILD	LISN	sentCORE	0.1
77	LH	CONGRUENT	TYP_MILD	LISN	sentHUBS	0.152
77	LH	CONGRUENT	TYP_MILD	PROD	sentCORE	0.077
77	LH	CONGRUENT	TYP_MILD	PROD	sentHUBS	0.225
77	LH	CONGRUENT	TYP_MILD	READ	sentCORE	0.168
77	LH	CONGRUENT	TYP_MILD	READ	sentHUBS	0.389
78	LH	CROSSED	TYP_MILD	LISN	sentCORE	-0.013
78	LH	CROSSED	TYP_MILD	LISN	sentHUBS	0.124
78	LH	CROSSED	TYP_MILD	PROD	sentCORE	0.083
78	LH	CROSSED	TYP_MILD	PROD	sentHUBS	0.543
78	LH	CROSSED	TYP_MILD	READ	sentCORE	-0.1
78	LH	CROSSED	TYP_MILD	READ	sentHUBS	-0.048
79	LH	CONGRUENT	TYP_STRONG	LISN	sentCORE	0.302
79	LH	CONGRUENT	TYP_STRONG	LISN	sentHUBS	0.379
79	LH	CONGRUENT	TYP_STRONG	PROD	sentCORE	0.334
79	LH	CONGRUENT	TYP_STRONG	PROD	sentHUBS	0.653
79	LH	CONGRUENT	TYP_STRONG	READ	sentCORE	0.458
79	LH	CONGRUENT	TYP_STRONG	READ	sentHUBS	0.413
80	LH	CONGRUENT	TYP_MILD	LISN	sentCORE	0.125
80	LH	CONGRUENT	TYP_MILD	LISN	sentHUBS	-0.038
80	LH	CONGRUENT	TYP_MILD	PROD	sentCORE	0.422
80	LH	CONGRUENT	TYP_MILD	PROD	sentHUBS	0.279
80	LH	CONGRUENT	TYP_MILD	READ	sentCORE	0.176
80	LH	CONGRUENT	TYP_MILD	READ	sentHUBS	-0.046
81	LH	CONGRUENT	TYP_STRONG	LISN	sentCORE	0.201
81	LH	CONGRUENT	TYP_STRONG	LISN	sentHUBS	0.441
81	LH	CONGRUENT	TYP_STRONG	PROD	sentCORE	0.545
81	LH	CONGRUENT	TYP_STRONG	PROD	sentHUBS	0.565
81	LH	CONGRUENT	TYP_STRONG	READ	sentCORE	0.157
81	LH	CONGRUENT	TYP_STRONG	READ	sentHUBS	0.54
82	LH	CONGRUENT	TYP_STRONG	LISN	sentCORE	0.136
82	LH	CONGRUENT	TYP_STRONG	LISN	sentHUBS	0.089
82	LH	CONGRUENT	TYP_STRONG	PROD	sentCORE	0.64
82	LH	CONGRUENT	TYP_STRONG	PROD	sentHUBS	1.011
82	LH	CONGRUENT	TYP_STRONG	READ	sentCORE	-0.027
82	LH	CONGRUENT	TYP_STRONG	READ	sentHUBS	0.027
83	LH	CONGRUENT	TYP_STRONG	LISN	sentCORE	0.213
83	LH	CONGRUENT	TYP_STRONG	LISN	sentHUBS	0.207
83	LH	CONGRUENT	TYP_STRONG	PROD	sentCORE	0.602
83	LH	CONGRUENT	TYP_STRONG	PROD	sentHUBS	0.747
83	LH	CONGRUENT	TYP_STRONG	READ	sentCORE	0.41
83	LH	CONGRUENT	TYP_STRONG	READ	sentHUBS	0.668
84	LH	CONGRUENT	TYP_MILD	LISN	sentCORE	0.314
84	LH	CONGRUENT	TYP_MILD	LISN	sentHUBS	0.144
84	LH	CONGRUENT	TYP_MILD	PROD	sentCORE	0.375
84	LH	CONGRUENT	TYP_MILD	PROD	sentHUBS	0.551
84	LH	CONGRUENT	TYP_MILD	READ	sentCORE	0.208
84	LH	CONGRUENT	TYP_MILD	READ	sentHUBS	0.119
85	LH	CONGRUENT	TYP_MILD	LISN	sentCORE	0.214
85	LH	CONGRUENT	TYP_MILD	LISN	sentHUBS	0.26
85	LH	CONGRUENT	TYP_MILD	PROD	sentCORE	0.315
85	LH	CONGRUENT	TYP_MILD	PROD	sentHUBS	0.349
85	LH	CONGRUENT	TYP_MILD	READ	sentCORE	-0.042
85	LH	CONGRUENT	TYP_MILD	READ	sentHUBS	-0.009
86	LH	CONGRUENT	TYP_MILD	LISN	sentCORE	0.216
86	LH	CONGRUENT	TYP_MILD	LISN	sentHUBS	0.249
86	LH	CONGRUENT	TYP_MILD	PROD	sentCORE	0.218
86	LH	CONGRUENT	TYP_MILD	PROD	sentHUBS	0.326
86	LH	CONGRUENT	TYP_MILD	READ	sentCORE	0.213
86	LH	CONGRUENT	TYP_MILD	READ	sentHUBS	0.329
87	LH	CONGRUENT	ATYP	LISN	sentCORE	-0.143
87	LH	CONGRUENT	ATYP	LISN	sentHUBS	-0.042
87	LH	CONGRUENT	ATYP	PROD	sentCORE	-0.142
87	LH	CONGRUENT	ATYP	PROD	sentHUBS	-0.012
87	LH	CONGRUENT	ATYP	READ	sentCORE	-0.16
87	LH	CONGRUENT	ATYP	READ	sentHUBS	-0.171
88	LH	CONGRUENT	TYP_STRONG	LISN	sentCORE	0.241
88	LH	CONGRUENT	TYP_STRONG	LISN	sentHUBS	0.335
88	LH	CONGRUENT	TYP_STRONG	PROD	sentCORE	0.375
88	LH	CONGRUENT	TYP_STRONG	PROD	sentHUBS	0.748
88	LH	CONGRUENT	TYP_STRONG	READ	sentCORE	0.002
88	LH	CONGRUENT	TYP_STRONG	READ	sentHUBS	0.04
89	LH	CONGRUENT	ATYP	LISN	sentCORE	-0.131
89	LH	CONGRUENT	ATYP	LISN	sentHUBS	-0.448
89	LH	CONGRUENT	ATYP	PROD	sentCORE	-0.155
89	LH	CONGRUENT	ATYP	PROD	sentHUBS	-0.222
89	LH	CONGRUENT	ATYP	READ	sentCORE	-0.332
89	LH	CONGRUENT	ATYP	READ	sentHUBS	-0.799
90	LH	CONGRUENT	TYP_STRONG	LISN	sentCORE	0.191
90	LH	CONGRUENT	TYP_STRONG	LISN	sentHUBS	0.544
90	LH	CONGRUENT	TYP_STRONG	PROD	sentCORE	0.242
90	LH	CONGRUENT	TYP_STRONG	PROD	sentHUBS	0.805
90	LH	CONGRUENT	TYP_STRONG	READ	sentCORE	0.335
90	LH	CONGRUENT	TYP_STRONG	READ	sentHUBS	0.697
91	LH	CONGRUENT	TYP_MILD	LISN	sentCORE	0.234
91	LH	CONGRUENT	TYP_MILD	LISN	sentHUBS	0.46
91	LH	CONGRUENT	TYP_MILD	PROD	sentCORE	0.279
91	LH	CONGRUENT	TYP_MILD	PROD	sentHUBS	0.425
91	LH	CONGRUENT	TYP_MILD	READ	sentCORE	0.155
91	LH	CONGRUENT	TYP_MILD	READ	sentHUBS	0.357
92	LH	CONGRUENT	TYP_STRONG	LISN	sentCORE	0.235
92	LH	CONGRUENT	TYP_STRONG	LISN	sentHUBS	0.422
92	LH	CONGRUENT	TYP_STRONG	PROD	sentCORE	0.509
92	LH	CONGRUENT	TYP_STRONG	PROD	sentHUBS	0.761
92	LH	CONGRUENT	TYP_STRONG	READ	sentCORE	0.219
92	LH	CONGRUENT	TYP_STRONG	READ	sentHUBS	0.375
93	LH	CROSSED	ATYP	LISN	sentCORE	0.028
93	LH	CROSSED	ATYP	LISN	sentHUBS	0.14
93	LH	CROSSED	ATYP	PROD	sentCORE	-0.179
93	LH	CROSSED	ATYP	PROD	sentHUBS	0.13
93	LH	CROSSED	ATYP	READ	sentCORE	-0.032
93	LH	CROSSED	ATYP	READ	sentHUBS	0.136
94	LH	CONGRUENT	ATYP	LISN	sentCORE	0.002
94	LH	CONGRUENT	ATYP	LISN	sentHUBS	-0.164
94	LH	CONGRUENT	ATYP	PROD	sentCORE	-0.13
94	LH	CONGRUENT	ATYP	PROD	sentHUBS	-0.121
94	LH	CONGRUENT	ATYP	READ	sentCORE	-0.13
94	LH	CONGRUENT	ATYP	READ	sentHUBS	-0.282
95	LH	CONGRUENT	TYP_STRONG	LISN	sentCORE	0.421
95	LH	CONGRUENT	TYP_STRONG	LISN	sentHUBS	0.571
95	LH	CONGRUENT	TYP_STRONG	PROD	sentCORE	0.336
95	LH	CONGRUENT	TYP_STRONG	PROD	sentHUBS	0.697
95	LH	CONGRUENT	TYP_STRONG	READ	sentCORE	0.251
95	LH	CONGRUENT	TYP_STRONG	READ	sentHUBS	0.472
96	RH	CONGRUENT	TYP_MILD	LISN	sentCORE	0.409
96	RH	CONGRUENT	TYP_MILD	LISN	sentHUBS	0.555
96	RH	CONGRUENT	TYP_MILD	PROD	sentCORE	0.168
96	RH	CONGRUENT	TYP_MILD	PROD	sentHUBS	0.313
96	RH	CONGRUENT	TYP_MILD	READ	sentCORE	0.407
96	RH	CONGRUENT	TYP_MILD	READ	sentHUBS	0.644
97	LH	CONGRUENT	TYP_MILD	LISN	sentCORE	0.082
97	LH	CONGRUENT	TYP_MILD	LISN	sentHUBS	0.217
97	LH	CONGRUENT	TYP_MILD	PROD	sentCORE	0.374
97	LH	CONGRUENT	TYP_MILD	PROD	sentHUBS	0.503
97	LH	CONGRUENT	TYP_MILD	READ	sentCORE	0.173
97	LH	CONGRUENT	TYP_MILD	READ	sentHUBS	0.513
98	LH	CONGRUENT	TYP_MILD	LISN	sentCORE	0.164
98	LH	CONGRUENT	TYP_MILD	LISN	sentHUBS	0.194
98	LH	CONGRUENT	TYP_MILD	PROD	sentCORE	0.432
98	LH	CONGRUENT	TYP_MILD	PROD	sentHUBS	0.509
98	LH	CONGRUENT	TYP_MILD	READ	sentCORE	0.314
98	LH	CONGRUENT	TYP_MILD	READ	sentHUBS	0.413
99	LH	CONGRUENT	TYP_MILD	LISN	sentCORE	0.301
99	LH	CONGRUENT	TYP_MILD	LISN	sentHUBS	0.273
99	LH	CONGRUENT	TYP_MILD	PROD	sentCORE	0.387
99	LH	CONGRUENT	TYP_MILD	PROD	sentHUBS	0.445
99	LH	CONGRUENT	TYP_MILD	READ	sentCORE	0.564
99	LH	CONGRUENT	TYP_MILD	READ	sentHUBS	0.58
100	RH	CONGRUENT	TYP_STRONG	LISN	sentCORE	0.372
100	RH	CONGRUENT	TYP_STRONG	LISN	sentHUBS	0.556
100	RH	CONGRUENT	TYP_STRONG	PROD	sentCORE	0.687
100	RH	CONGRUENT	TYP_STRONG	PROD	sentHUBS	1.17
100	RH	CONGRUENT	TYP_STRONG	READ	sentCORE	0.298
100	RH	CONGRUENT	TYP_STRONG	READ	sentHUBS	0.401
101	LH	CONGRUENT	TYP_MILD	LISN	sentCORE	0.228
101	LH	CONGRUENT	TYP_MILD	LISN	sentHUBS	0.14
101	LH	CONGRUENT	TYP_MILD	PROD	sentCORE	0.093
101	LH	CONGRUENT	TYP_MILD	PROD	sentHUBS	0.053
101	LH	CONGRUENT	TYP_MILD	READ	sentCORE	0.398
101	LH	CONGRUENT	TYP_MILD	READ	sentHUBS	0.416
102	LH	CONGRUENT	TYP_MILD	LISN	sentCORE	0.159
102	LH	CONGRUENT	TYP_MILD	LISN	sentHUBS	0.113
102	LH	CONGRUENT	TYP_MILD	PROD	sentCORE	0.278
102	LH	CONGRUENT	TYP_MILD	PROD	sentHUBS	0.315
102	LH	CONGRUENT	TYP_MILD	READ	sentCORE	0.332
102	LH	CONGRUENT	TYP_MILD	READ	sentHUBS	0.483
103	LH	CONGRUENT	TYP_STRONG	LISN	sentCORE	0.362
103	LH	CONGRUENT	TYP_STRONG	LISN	sentHUBS	0.51
103	LH	CONGRUENT	TYP_STRONG	PROD	sentCORE	0.642
103	LH	CONGRUENT	TYP_STRONG	PROD	sentHUBS	0.86
103	LH	CONGRUENT	TYP_STRONG	READ	sentCORE	0.318
103	LH	CONGRUENT	TYP_STRONG	READ	sentHUBS	0.576
104	LH	CONGRUENT	TYP_STRONG	LISN	sentCORE	0.388
104	LH	CONGRUENT	TYP_STRONG	LISN	sentHUBS	0.485
104	LH	CONGRUENT	TYP_STRONG	PROD	sentCORE	0.638
104	LH	CONGRUENT	TYP_STRONG	PROD	sentHUBS	0.72
104	LH	CONGRUENT	TYP_STRONG	READ	sentCORE	0.259
104	LH	CONGRUENT	TYP_STRONG	READ	sentHUBS	0.248
105	LH	CONGRUENT	TYP_STRONG	LISN	sentCORE	0.523
105	LH	CONGRUENT	TYP_STRONG	LISN	sentHUBS	0.941
105	LH	CONGRUENT	TYP_STRONG	PROD	sentCORE	1.139
105	LH	CONGRUENT	TYP_STRONG	PROD	sentHUBS	1.634
105	LH	CONGRUENT	TYP_STRONG	READ	sentCORE	0.462
105	LH	CONGRUENT	TYP_STRONG	READ	sentHUBS	0.621
106	LH	CONGRUENT	TYP_MILD	LISN	sentCORE	0.222
106	LH	CONGRUENT	TYP_MILD	LISN	sentHUBS	0.194
106	LH	CONGRUENT	TYP_MILD	PROD	sentCORE	0.166
106	LH	CONGRUENT	TYP_MILD	PROD	sentHUBS	0.333
106	LH	CONGRUENT	TYP_MILD	READ	sentCORE	0.223
106	LH	CONGRUENT	TYP_MILD	READ	sentHUBS	0.381
107	LH	CONGRUENT	TYP_MILD	LISN	sentCORE	0.162
107	LH	CONGRUENT	TYP_MILD	LISN	sentHUBS	0.182
107	LH	CONGRUENT	TYP_MILD	PROD	sentCORE	0.021
107	LH	CONGRUENT	TYP_MILD	PROD	sentHUBS	0.244
107	LH	CONGRUENT	TYP_MILD	READ	sentCORE	0.388
107	LH	CONGRUENT	TYP_MILD	READ	sentHUBS	0.735
108	LH	CONGRUENT	TYP_MILD	LISN	sentCORE	0.243
108	LH	CONGRUENT	TYP_MILD	LISN	sentHUBS	0.34
108	LH	CONGRUENT	TYP_MILD	PROD	sentCORE	0.329
108	LH	CONGRUENT	TYP_MILD	PROD	sentHUBS	0.474
108	LH	CONGRUENT	TYP_MILD	READ	sentCORE	0.557
108	LH	CONGRUENT	TYP_MILD	READ	sentHUBS	0.872
109	RH	CONGRUENT	TYP_STRONG	LISN	sentCORE	0.191
109	RH	CONGRUENT	TYP_STRONG	LISN	sentHUBS	0.26
109	RH	CONGRUENT	TYP_STRONG	PROD	sentCORE	0.697
109	RH	CONGRUENT	TYP_STRONG	PROD	sentHUBS	0.983
109	RH	CONGRUENT	TYP_STRONG	READ	sentCORE	0.323
109	RH	CONGRUENT	TYP_STRONG	READ	sentHUBS	0.448
110	RH	CONGRUENT	TYP_MILD	LISN	sentCORE	0.182
110	RH	CONGRUENT	TYP_MILD	LISN	sentHUBS	0.208
110	RH	CONGRUENT	TYP_MILD	PROD	sentCORE	0.187
110	RH	CONGRUENT	TYP_MILD	PROD	sentHUBS	0.252
110	RH	CONGRUENT	TYP_MILD	READ	sentCORE	0.243
110	RH	CONGRUENT	TYP_MILD	READ	sentHUBS	0.236
111	RH	CROSSED	ATYP	LISN	sentCORE	0.081
111	RH	CROSSED	ATYP	LISN	sentHUBS	0.145
111	RH	CROSSED	ATYP	PROD	sentCORE	-0.078
111	RH	CROSSED	ATYP	PROD	sentHUBS	-0.199
111	RH	CROSSED	ATYP	READ	sentCORE	-0.099
111	RH	CROSSED	ATYP	READ	sentHUBS	-0.182
112	RH	CONGRUENT	TYP_MILD	LISN	sentCORE	0.236
112	RH	CONGRUENT	TYP_MILD	LISN	sentHUBS	0.296
112	RH	CONGRUENT	TYP_MILD	PROD	sentCORE	0.563
112	RH	CONGRUENT	TYP_MILD	PROD	sentHUBS	0.8
112	RH	CONGRUENT	TYP_MILD	READ	sentCORE	0.258
112	RH	CONGRUENT	TYP_MILD	READ	sentHUBS	0.84
113	RH	CONGRUENT	TYP_MILD	LISN	sentCORE	0.171
113	RH	CONGRUENT	TYP_MILD	LISN	sentHUBS	0.302
113	RH	CONGRUENT	TYP_MILD	PROD	sentCORE	0.303
113	RH	CONGRUENT	TYP_MILD	PROD	sentHUBS	0.502
113	RH	CONGRUENT	TYP_MILD	READ	sentCORE	0.282
113	RH	CONGRUENT	TYP_MILD	READ	sentHUBS	0.447
114	RH	CONGRUENT	TYP_MILD	LISN	sentCORE	0.094
114	RH	CONGRUENT	TYP_MILD	LISN	sentHUBS	0.103
114	RH	CONGRUENT	TYP_MILD	PROD	sentCORE	0.311
114	RH	CONGRUENT	TYP_MILD	PROD	sentHUBS	0.353
114	RH	CONGRUENT	TYP_MILD	READ	sentCORE	0.134
114	RH	CONGRUENT	TYP_MILD	READ	sentHUBS	0.101
115	RH	CONGRUENT	TYP_STRONG	LISN	sentCORE	0.388
115	RH	CONGRUENT	TYP_STRONG	LISN	sentHUBS	0.666
115	RH	CONGRUENT	TYP_STRONG	PROD	sentCORE	0.376
115	RH	CONGRUENT	TYP_STRONG	PROD	sentHUBS	0.575
115	RH	CONGRUENT	TYP_STRONG	READ	sentCORE	0.484
115	RH	CONGRUENT	TYP_STRONG	READ	sentHUBS	0.67
116	RH	CONGRUENT	TYP_STRONG	LISN	sentCORE	0.333
116	RH	CONGRUENT	TYP_STRONG	LISN	sentHUBS	0.584
116	RH	CONGRUENT	TYP_STRONG	PROD	sentCORE	0.79
116	RH	CONGRUENT	TYP_STRONG	PROD	sentHUBS	1.024
116	RH	CONGRUENT	TYP_STRONG	READ	sentCORE	0.542
116	RH	CONGRUENT	TYP_STRONG	READ	sentHUBS	0.866
117	RH	CONGRUENT	ATYP	LISN	sentCORE	0.002
117	RH	CONGRUENT	ATYP	LISN	sentHUBS	-0.105
117	RH	CONGRUENT	ATYP	PROD	sentCORE	0.018
117	RH	CONGRUENT	ATYP	PROD	sentHUBS	-0.206
117	RH	CONGRUENT	ATYP	READ	sentCORE	-0.045
117	RH	CONGRUENT	ATYP	READ	sentHUBS	-0.231
118	RH	CONGRUENT	TYP_MILD	LISN	sentCORE	0.107
118	RH	CONGRUENT	TYP_MILD	LISN	sentHUBS	0.029
118	RH	CONGRUENT	TYP_MILD	PROD	sentCORE	0.294
118	RH	CONGRUENT	TYP_MILD	PROD	sentHUBS	0.64
118	RH	CONGRUENT	TYP_MILD	READ	sentCORE	0.187
118	RH	CONGRUENT	TYP_MILD	READ	sentHUBS	0.043
119	RH	CONGRUENT	TYP_STRONG	LISN	sentCORE	0.051
119	RH	CONGRUENT	TYP_STRONG	LISN	sentHUBS	-0.007
119	RH	CONGRUENT	TYP_STRONG	PROD	sentCORE	0.349
119	RH	CONGRUENT	TYP_STRONG	PROD	sentHUBS	0.489
119	RH	CONGRUENT	TYP_STRONG	READ	sentCORE	0.107
119	RH	CONGRUENT	TYP_STRONG	READ	sentHUBS	0.311
120	RH	CONGRUENT	ATYP	LISN	sentCORE	-0.103
120	RH	CONGRUENT	ATYP	LISN	sentHUBS	-0.102
120	RH	CONGRUENT	ATYP	PROD	sentCORE	-0.087
120	RH	CONGRUENT	ATYP	PROD	sentHUBS	-0.083
120	RH	CONGRUENT	ATYP	READ	sentCORE	-0.218
120	RH	CONGRUENT	ATYP	READ	sentHUBS	-0.194
121	RH	CONGRUENT	TYP_STRONG	LISN	sentCORE	0.564
121	RH	CONGRUENT	TYP_STRONG	LISN	sentHUBS	0.702
121	RH	CONGRUENT	TYP_STRONG	PROD	sentCORE	0.804
121	RH	CONGRUENT	TYP_STRONG	PROD	sentHUBS	1.187
121	RH	CONGRUENT	TYP_STRONG	READ	sentCORE	0.654
121	RH	CONGRUENT	TYP_STRONG	READ	sentHUBS	0.634
122	RH	CONGRUENT	TYP_STRONG	LISN	sentCORE	0.43
122	RH	CONGRUENT	TYP_STRONG	LISN	sentHUBS	0.477
122	RH	CONGRUENT	TYP_STRONG	PROD	sentCORE	0.81
122	RH	CONGRUENT	TYP_STRONG	PROD	sentHUBS	0.993
122	RH	CONGRUENT	TYP_STRONG	READ	sentCORE	0.757
122	RH	CONGRUENT	TYP_STRONG	READ	sentHUBS	0.886
123	RH	CONGRUENT	TYP_MILD	LISN	sentCORE	0.408
123	RH	CONGRUENT	TYP_MILD	LISN	sentHUBS	0.592
123	RH	CONGRUENT	TYP_MILD	PROD	sentCORE	0.282
123	RH	CONGRUENT	TYP_MILD	PROD	sentHUBS	0.435
123	RH	CONGRUENT	TYP_MILD	READ	sentCORE	0.456
123	RH	CONGRUENT	TYP_MILD	READ	sentHUBS	0.407
124	RH	CONGRUENT	TYP_MILD	LISN	sentCORE	-0.014
124	RH	CONGRUENT	TYP_MILD	LISN	sentHUBS	0.153
124	RH	CONGRUENT	TYP_MILD	PROD	sentCORE	0.081
124	RH	CONGRUENT	TYP_MILD	PROD	sentHUBS	0.232
124	RH	CONGRUENT	TYP_MILD	READ	sentCORE	0.013
124	RH	CONGRUENT	TYP_MILD	READ	sentHUBS	0.102
125	RH	CONGRUENT	TYP_STRONG	LISN	sentCORE	0.326
125	RH	CONGRUENT	TYP_STRONG	LISN	sentHUBS	0.394
125	RH	CONGRUENT	TYP_STRONG	PROD	sentCORE	0.49
125	RH	CONGRUENT	TYP_STRONG	PROD	sentHUBS	0.699
125	RH	CONGRUENT	TYP_STRONG	READ	sentCORE	0.221
125	RH	CONGRUENT	TYP_STRONG	READ	sentHUBS	0.183
126	RH	CONGRUENT	TYP_STRONG	LISN	sentCORE	0.28
126	RH	CONGRUENT	TYP_STRONG	LISN	sentHUBS	0.334
126	RH	CONGRUENT	TYP_STRONG	PROD	sentCORE	0.499
126	RH	CONGRUENT	TYP_STRONG	PROD	sentHUBS	0.552
126	RH	CONGRUENT	TYP_STRONG	READ	sentCORE	0.318
126	RH	CONGRUENT	TYP_STRONG	READ	sentHUBS	0.223
127	RH	CONGRUENT	TYP_STRONG	LISN	sentCORE	0.247
127	RH	CONGRUENT	TYP_STRONG	LISN	sentHUBS	0.28
127	RH	CONGRUENT	TYP_STRONG	PROD	sentCORE	0.208
127	RH	CONGRUENT	TYP_STRONG	PROD	sentHUBS	0.526
127	RH	CONGRUENT	TYP_STRONG	READ	sentCORE	0.332
127	RH	CONGRUENT	TYP_STRONG	READ	sentHUBS	0.438
128	RH	CONGRUENT	TYP_STRONG	LISN	sentCORE	0.446
128	RH	CONGRUENT	TYP_STRONG	LISN	sentHUBS	0.459
128	RH	CONGRUENT	TYP_STRONG	PROD	sentCORE	0.564
128	RH	CONGRUENT	TYP_STRONG	PROD	sentHUBS	0.74
128	RH	CONGRUENT	TYP_STRONG	READ	sentCORE	0.278
128	RH	CONGRUENT	TYP_STRONG	READ	sentHUBS	0.049
129	LH	CROSSED	ATYP	LISN	sentCORE	-0.297
129	LH	CROSSED	ATYP	LISN	sentHUBS	-0.956
129	LH	CROSSED	ATYP	PROD	sentCORE	0.138
129	LH	CROSSED	ATYP	PROD	sentHUBS	0.234
129	LH	CROSSED	ATYP	READ	sentCORE	-0.247
129	LH	CROSSED	ATYP	READ	sentHUBS	-0.733
130	RH	CONGRUENT	TYP_STRONG	LISN	sentCORE	0.235
130	RH	CONGRUENT	TYP_STRONG	LISN	sentHUBS	0.269
130	RH	CONGRUENT	TYP_STRONG	PROD	sentCORE	0.722
130	RH	CONGRUENT	TYP_STRONG	PROD	sentHUBS	0.786
130	RH	CONGRUENT	TYP_STRONG	READ	sentCORE	0.298
130	RH	CONGRUENT	TYP_STRONG	READ	sentHUBS	0.216
131	LH	CONGRUENT	TYP_MILD	LISN	sentCORE	0.251
131	LH	CONGRUENT	TYP_MILD	LISN	sentHUBS	0.11
131	LH	CONGRUENT	TYP_MILD	PROD	sentCORE	0.49
131	LH	CONGRUENT	TYP_MILD	PROD	sentHUBS	0.476
131	LH	CONGRUENT	TYP_MILD	READ	sentCORE	0.318
131	LH	CONGRUENT	TYP_MILD	READ	sentHUBS	0.199
132	LH	CONGRUENT	TYP_STRONG	LISN	sentCORE	0.177
132	LH	CONGRUENT	TYP_STRONG	LISN	sentHUBS	0.258
132	LH	CONGRUENT	TYP_STRONG	PROD	sentCORE	0.596
132	LH	CONGRUENT	TYP_STRONG	PROD	sentHUBS	0.875
132	LH	CONGRUENT	TYP_STRONG	READ	sentCORE	0.43
132	LH	CONGRUENT	TYP_STRONG	READ	sentHUBS	0.596
133	RH	CONGRUENT	TYP_MILD	LISN	sentCORE	0.236
133	RH	CONGRUENT	TYP_MILD	LISN	sentHUBS	0.284
133	RH	CONGRUENT	TYP_MILD	PROD	sentCORE	0.371
133	RH	CONGRUENT	TYP_MILD	PROD	sentHUBS	0.445
133	RH	CONGRUENT	TYP_MILD	READ	sentCORE	0.239
133	RH	CONGRUENT	TYP_MILD	READ	sentHUBS	0.198
134	LH	CONGRUENT	TYP_STRONG	LISN	sentCORE	0.244
134	LH	CONGRUENT	TYP_STRONG	LISN	sentHUBS	0.468
134	LH	CONGRUENT	TYP_STRONG	PROD	sentCORE	0.496
134	LH	CONGRUENT	TYP_STRONG	PROD	sentHUBS	0.807
134	LH	CONGRUENT	TYP_STRONG	READ	sentCORE	0.502
134	LH	CONGRUENT	TYP_STRONG	READ	sentHUBS	0.862
135	LH	CONGRUENT	TYP_MILD	LISN	sentCORE	0.058
135	LH	CONGRUENT	TYP_MILD	LISN	sentHUBS	0.06
135	LH	CONGRUENT	TYP_MILD	PROD	sentCORE	0.188
135	LH	CONGRUENT	TYP_MILD	PROD	sentHUBS	0.488
135	LH	CONGRUENT	TYP_MILD	READ	sentCORE	0.171
135	LH	CONGRUENT	TYP_MILD	READ	sentHUBS	0.543
136	RH	CONGRUENT	TYP_STRONG	LISN	sentCORE	0.481
136	RH	CONGRUENT	TYP_STRONG	LISN	sentHUBS	0.524
136	RH	CONGRUENT	TYP_STRONG	PROD	sentCORE	0.31
136	RH	CONGRUENT	TYP_STRONG	PROD	sentHUBS	0.577
136	RH	CONGRUENT	TYP_STRONG	READ	sentCORE	0.519
136	RH	CONGRUENT	TYP_STRONG	READ	sentHUBS	0.606
137	LH	CONGRUENT	TYP_STRONG	LISN	sentCORE	0.616
137	LH	CONGRUENT	TYP_STRONG	LISN	sentHUBS	0.877
137	LH	CONGRUENT	TYP_STRONG	PROD	sentCORE	0.776
137	LH	CONGRUENT	TYP_STRONG	PROD	sentHUBS	0.966
137	LH	CONGRUENT	TYP_STRONG	READ	sentCORE	0.664
137	LH	CONGRUENT	TYP_STRONG	READ	sentHUBS	0.859
138	LH	CONGRUENT	TYP_MILD	LISN	sentCORE	0.16
138	LH	CONGRUENT	TYP_MILD	LISN	sentHUBS	0.22
138	LH	CONGRUENT	TYP_MILD	PROD	sentCORE	0.408
138	LH	CONGRUENT	TYP_MILD	PROD	sentHUBS	0.652
138	LH	CONGRUENT	TYP_MILD	READ	sentCORE	0.283
138	LH	CONGRUENT	TYP_MILD	READ	sentHUBS	0.359
139	RH	CONGRUENT	TYP_MILD	LISN	sentCORE	0.157
139	RH	CONGRUENT	TYP_MILD	LISN	sentHUBS	0.198
139	RH	CONGRUENT	TYP_MILD	PROD	sentCORE	0.251
139	RH	CONGRUENT	TYP_MILD	PROD	sentHUBS	0.385
139	RH	CONGRUENT	TYP_MILD	READ	sentCORE	0.225
139	RH	CONGRUENT	TYP_MILD	READ	sentHUBS	0.169
140	LH	CONGRUENT	ATYP	LISN	sentCORE	-0.211
140	LH	CONGRUENT	ATYP	LISN	sentHUBS	-0.268
140	LH	CONGRUENT	ATYP	PROD	sentCORE	-0.292
140	LH	CONGRUENT	ATYP	PROD	sentHUBS	-0.406
140	LH	CONGRUENT	ATYP	READ	sentCORE	-0.302
140	LH	CONGRUENT	ATYP	READ	sentHUBS	-0.556
141	LH	CONGRUENT	TYP_MILD	LISN	sentCORE	0.264
141	LH	CONGRUENT	TYP_MILD	LISN	sentHUBS	0.336
141	LH	CONGRUENT	TYP_MILD	PROD	sentCORE	0.39
141	LH	CONGRUENT	TYP_MILD	PROD	sentHUBS	0.509
141	LH	CONGRUENT	TYP_MILD	READ	sentCORE	0.48
141	LH	CONGRUENT	TYP_MILD	READ	sentHUBS	0.798
142	LH	CONGRUENT	TYP_MILD	LISN	sentCORE	0.092
142	LH	CONGRUENT	TYP_MILD	LISN	sentHUBS	0.14
142	LH	CONGRUENT	TYP_MILD	PROD	sentCORE	0.051
142	LH	CONGRUENT	TYP_MILD	PROD	sentHUBS	0.099
142	LH	CONGRUENT	TYP_MILD	READ	sentCORE	0.156
142	LH	CONGRUENT	TYP_MILD	READ	sentHUBS	0.243
143	RH	CONGRUENT	TYP_MILD	LISN	sentCORE	0.151
143	RH	CONGRUENT	TYP_MILD	LISN	sentHUBS	0.092
143	RH	CONGRUENT	TYP_MILD	PROD	sentCORE	0.341
143	RH	CONGRUENT	TYP_MILD	PROD	sentHUBS	0.532
143	RH	CONGRUENT	TYP_MILD	READ	sentCORE	0.349
143	RH	CONGRUENT	TYP_MILD	READ	sentHUBS	0.397
144	LH	CROSSED	ATYP	LISN	sentCORE	0.095
144	LH	CROSSED	ATYP	LISN	sentHUBS	-0.06
144	LH	CROSSED	ATYP	PROD	sentCORE	-0.209
144	LH	CROSSED	ATYP	PROD	sentHUBS	-0.274
144	LH	CROSSED	ATYP	READ	sentCORE	0.173
144	LH	CROSSED	ATYP	READ	sentHUBS	0.053
145	LH	CONGRUENT	TYP_MILD	LISN	sentCORE	0.189
145	LH	CONGRUENT	TYP_MILD	LISN	sentHUBS	0.002
145	LH	CONGRUENT	TYP_MILD	PROD	sentCORE	0.487
145	LH	CONGRUENT	TYP_MILD	PROD	sentHUBS	0.379
145	LH	CONGRUENT	TYP_MILD	READ	sentCORE	0.119
145	LH	CONGRUENT	TYP_MILD	READ	sentHUBS	-0.039
146	LH	CONGRUENT	ATYP	LISN	sentCORE	-0.077
146	LH	CONGRUENT	ATYP	LISN	sentHUBS	-0.247
146	LH	CONGRUENT	ATYP	PROD	sentCORE	-0.168
146	LH	CONGRUENT	ATYP	PROD	sentHUBS	-0.201
146	LH	CONGRUENT	ATYP	READ	sentCORE	-0.095
146	LH	CONGRUENT	ATYP	READ	sentHUBS	-0.247
147	LH	CONGRUENT	TYP_STRONG	LISN	sentCORE	0.376
147	LH	CONGRUENT	TYP_STRONG	LISN	sentHUBS	0.586
147	LH	CONGRUENT	TYP_STRONG	PROD	sentCORE	0.508
147	LH	CONGRUENT	TYP_STRONG	PROD	sentHUBS	0.839
147	LH	CONGRUENT	TYP_STRONG	READ	sentCORE	0.336
147	LH	CONGRUENT	TYP_STRONG	READ	sentHUBS	0.492
148	RH	CONGRUENT	TYP_MILD	LISN	sentCORE	0.193
148	RH	CONGRUENT	TYP_MILD	LISN	sentHUBS	0.309
148	RH	CONGRUENT	TYP_MILD	PROD	sentCORE	0.326
148	RH	CONGRUENT	TYP_MILD	PROD	sentHUBS	0.505
148	RH	CONGRUENT	TYP_MILD	READ	sentCORE	0.108
148	RH	CONGRUENT	TYP_MILD	READ	sentHUBS	0.166
149	LH	CONGRUENT	TYP_STRONG	LISN	sentCORE	0.324
149	LH	CONGRUENT	TYP_STRONG	LISN	sentHUBS	0.689
149	LH	CONGRUENT	TYP_STRONG	PROD	sentCORE	0.379
149	LH	CONGRUENT	TYP_STRONG	PROD	sentHUBS	0.598
149	LH	CONGRUENT	TYP_STRONG	READ	sentCORE	0.167
149	LH	CONGRUENT	TYP_STRONG	READ	sentHUBS	0.393
150	LH	CONGRUENT	TYP_STRONG	LISN	sentCORE	0.31
150	LH	CONGRUENT	TYP_STRONG	LISN	sentHUBS	0.39
150	LH	CONGRUENT	TYP_STRONG	PROD	sentCORE	0.659
150	LH	CONGRUENT	TYP_STRONG	PROD	sentHUBS	0.786
150	LH	CONGRUENT	TYP_STRONG	READ	sentCORE	0.517
150	LH	CONGRUENT	TYP_STRONG	READ	sentHUBS	0.55
151	LH	CONGRUENT	TYP_MILD	LISN	sentCORE	0.208
151	LH	CONGRUENT	TYP_MILD	LISN	sentHUBS	0.199
151	LH	CONGRUENT	TYP_MILD	PROD	sentCORE	0.35
151	LH	CONGRUENT	TYP_MILD	PROD	sentHUBS	0.385
151	LH	CONGRUENT	TYP_MILD	READ	sentCORE	0.278
151	LH	CONGRUENT	TYP_MILD	READ	sentHUBS	0.309
152	RH	CONGRUENT	TYP_MILD	LISN	sentCORE	0.114
152	RH	CONGRUENT	TYP_MILD	LISN	sentHUBS	0.14
152	RH	CONGRUENT	TYP_MILD	PROD	sentCORE	0.259
152	RH	CONGRUENT	TYP_MILD	PROD	sentHUBS	0.262
152	RH	CONGRUENT	TYP_MILD	READ	sentCORE	0.138
152	RH	CONGRUENT	TYP_MILD	READ	sentHUBS	0.129
153	LH	CONGRUENT	TYP_STRONG	LISN	sentCORE	0.321
153	LH	CONGRUENT	TYP_STRONG	LISN	sentHUBS	0.634
153	LH	CONGRUENT	TYP_STRONG	PROD	sentCORE	0.418
153	LH	CONGRUENT	TYP_STRONG	PROD	sentHUBS	0.848
153	LH	CONGRUENT	TYP_STRONG	READ	sentCORE	0.456
153	LH	CONGRUENT	TYP_STRONG	READ	sentHUBS	0.919
154	LH	CONGRUENT	TYP_STRONG	LISN	sentCORE	0.32
154	LH	CONGRUENT	TYP_STRONG	LISN	sentHUBS	0.573
154	LH	CONGRUENT	TYP_STRONG	PROD	sentCORE	0.282
154	LH	CONGRUENT	TYP_STRONG	PROD	sentHUBS	0.559
154	LH	CONGRUENT	TYP_STRONG	READ	sentCORE	0.238
154	LH	CONGRUENT	TYP_STRONG	READ	sentHUBS	0.481
155	LH	CONGRUENT	TYP_MILD	LISN	sentCORE	0.105
155	LH	CONGRUENT	TYP_MILD	LISN	sentHUBS	0.204
155	LH	CONGRUENT	TYP_MILD	PROD	sentCORE	0.337
155	LH	CONGRUENT	TYP_MILD	PROD	sentHUBS	0.574
155	LH	CONGRUENT	TYP_MILD	READ	sentCORE	0.376
155	LH	CONGRUENT	TYP_MILD	READ	sentHUBS	0.643
156	LH	CONGRUENT	TYP_MILD	LISN	sentCORE	0.086
156	LH	CONGRUENT	TYP_MILD	LISN	sentHUBS	0.093
156	LH	CONGRUENT	TYP_MILD	PROD	sentCORE	0.418
156	LH	CONGRUENT	TYP_MILD	PROD	sentHUBS	0.458
156	LH	CONGRUENT	TYP_MILD	READ	sentCORE	0.263
156	LH	CONGRUENT	TYP_MILD	READ	sentHUBS	0.148
157	LH	CONGRUENT	TYP_STRONG	LISN	sentCORE	0.34
157	LH	CONGRUENT	TYP_STRONG	LISN	sentHUBS	0.404
157	LH	CONGRUENT	TYP_STRONG	PROD	sentCORE	0.625
157	LH	CONGRUENT	TYP_STRONG	PROD	sentHUBS	0.802
157	LH	CONGRUENT	TYP_STRONG	READ	sentCORE	0.411
157	LH	CONGRUENT	TYP_STRONG	READ	sentHUBS	0.774
158	RH	CONGRUENT	TYP_MILD	LISN	sentCORE	0.185
158	RH	CONGRUENT	TYP_MILD	LISN	sentHUBS	0.393
158	RH	CONGRUENT	TYP_MILD	PROD	sentCORE	0.355
158	RH	CONGRUENT	TYP_MILD	PROD	sentHUBS	0.462
158	RH	CONGRUENT	TYP_MILD	READ	sentCORE	0.152
158	RH	CONGRUENT	TYP_MILD	READ	sentHUBS	0.285
159	LH	CONGRUENT	ATYP	LISN	sentCORE	-0.249
159	LH	CONGRUENT	ATYP	LISN	sentHUBS	-0.483
159	LH	CONGRUENT	ATYP	PROD	sentCORE	-0.184
159	LH	CONGRUENT	ATYP	PROD	sentHUBS	-0.29
159	LH	CONGRUENT	ATYP	READ	sentCORE	-0.23
159	LH	CONGRUENT	ATYP	READ	sentHUBS	-0.353
160	RH	CONGRUENT	TYP_MILD	LISN	sentCORE	0.121
160	RH	CONGRUENT	TYP_MILD	LISN	sentHUBS	0.243
160	RH	CONGRUENT	TYP_MILD	PROD	sentCORE	0.296
160	RH	CONGRUENT	TYP_MILD	PROD	sentHUBS	0.372
160	RH	CONGRUENT	TYP_MILD	READ	sentCORE	0.425
160	RH	CONGRUENT	TYP_MILD	READ	sentHUBS	0.598
161	RH	CONGRUENT	TYP_STRONG	LISN	sentCORE	0.273
161	RH	CONGRUENT	TYP_STRONG	LISN	sentHUBS	0.343
161	RH	CONGRUENT	TYP_STRONG	PROD	sentCORE	0.466
161	RH	CONGRUENT	TYP_STRONG	PROD	sentHUBS	0.73
161	RH	CONGRUENT	TYP_STRONG	READ	sentCORE	0.462
161	RH	CONGRUENT	TYP_STRONG	READ	sentHUBS	0.764
162	LH	CONGRUENT	TYP_MILD	LISN	sentCORE	0.187
162	LH	CONGRUENT	TYP_MILD	LISN	sentHUBS	0.4
162	LH	CONGRUENT	TYP_MILD	PROD	sentCORE	0.294
162	LH	CONGRUENT	TYP_MILD	PROD	sentHUBS	0.329
162	LH	CONGRUENT	TYP_MILD	READ	sentCORE	0.334
162	LH	CONGRUENT	TYP_MILD	READ	sentHUBS	0.606
163	RH	CONGRUENT	TYP_MILD	LISN	sentCORE	0.099
163	RH	CONGRUENT	TYP_MILD	LISN	sentHUBS	0.056
163	RH	CONGRUENT	TYP_MILD	PROD	sentCORE	0.272
163	RH	CONGRUENT	TYP_MILD	PROD	sentHUBS	0.167
163	RH	CONGRUENT	TYP_MILD	READ	sentCORE	0.335
163	RH	CONGRUENT	TYP_MILD	READ	sentHUBS	0.329
164	RH	CONGRUENT	TYP_STRONG	LISN	sentCORE	0.247
164	RH	CONGRUENT	TYP_STRONG	LISN	sentHUBS	0.404
164	RH	CONGRUENT	TYP_STRONG	PROD	sentCORE	0.528
164	RH	CONGRUENT	TYP_STRONG	PROD	sentHUBS	1.025
164	RH	CONGRUENT	TYP_STRONG	READ	sentCORE	0.552
164	RH	CONGRUENT	TYP_STRONG	READ	sentHUBS	0.846
165	LH	CONGRUENT	ATYP	LISN	sentCORE	-0.012
165	LH	CONGRUENT	ATYP	LISN	sentHUBS	-0.07
165	LH	CONGRUENT	ATYP	PROD	sentCORE	-0.227
165	LH	CONGRUENT	ATYP	PROD	sentHUBS	-0.224
165	LH	CONGRUENT	ATYP	READ	sentCORE	-0.17
165	LH	CONGRUENT	ATYP	READ	sentHUBS	-0.213
166	LH	CONGRUENT	TYP_STRONG	LISN	sentCORE	0.278
166	LH	CONGRUENT	TYP_STRONG	LISN	sentHUBS	0.621
166	LH	CONGRUENT	TYP_STRONG	PROD	sentCORE	0.726
166	LH	CONGRUENT	TYP_STRONG	PROD	sentHUBS	1.049
166	LH	CONGRUENT	TYP_STRONG	READ	sentCORE	0.791
166	LH	CONGRUENT	TYP_STRONG	READ	sentHUBS	1.642
167	LH	CONGRUENT	TYP_STRONG	LISN	sentCORE	0.219
167	LH	CONGRUENT	TYP_STRONG	LISN	sentHUBS	0.254
167	LH	CONGRUENT	TYP_STRONG	PROD	sentCORE	0.609
167	LH	CONGRUENT	TYP_STRONG	PROD	sentHUBS	0.743
167	LH	CONGRUENT	TYP_STRONG	READ	sentCORE	0.239
167	LH	CONGRUENT	TYP_STRONG	READ	sentHUBS	0.372
168	LH	CONGRUENT	TYP_MILD	LISN	sentCORE	0.176
168	LH	CONGRUENT	TYP_MILD	LISN	sentHUBS	0.154
168	LH	CONGRUENT	TYP_MILD	PROD	sentCORE	0.502
168	LH	CONGRUENT	TYP_MILD	PROD	sentHUBS	0.758
168	LH	CONGRUENT	TYP_MILD	READ	sentCORE	0.263
168	LH	CONGRUENT	TYP_MILD	READ	sentHUBS	0.348
169	LH	CONGRUENT	TYP_MILD	LISN	sentCORE	0.253
169	LH	CONGRUENT	TYP_MILD	LISN	sentHUBS	0.406
169	LH	CONGRUENT	TYP_MILD	PROD	sentCORE	0.151
169	LH	CONGRUENT	TYP_MILD	PROD	sentHUBS	0.236
169	LH	CONGRUENT	TYP_MILD	READ	sentCORE	0.306
169	LH	CONGRUENT	TYP_MILD	READ	sentHUBS	0.522
170	LH	CONGRUENT	TYP_MILD	LISN	sentCORE	0.082
170	LH	CONGRUENT	TYP_MILD	LISN	sentHUBS	-0.062
170	LH	CONGRUENT	TYP_MILD	PROD	sentCORE	0.349
170	LH	CONGRUENT	TYP_MILD	PROD	sentHUBS	-0.078
170	LH	CONGRUENT	TYP_MILD	READ	sentCORE	0.014
170	LH	CONGRUENT	TYP_MILD	READ	sentHUBS	-0.315
171	LH	CROSSED	TYP_MILD	LISN	sentCORE	0.106
171	LH	CROSSED	TYP_MILD	LISN	sentHUBS	0.159
171	LH	CROSSED	TYP_MILD	PROD	sentCORE	0.139
171	LH	CROSSED	TYP_MILD	PROD	sentHUBS	0.168
171	LH	CROSSED	TYP_MILD	READ	sentCORE	-0.057
171	LH	CROSSED	TYP_MILD	READ	sentHUBS	-0.039
172	LH	CONGRUENT	ATYP	LISN	sentCORE	-0.102
172	LH	CONGRUENT	ATYP	LISN	sentHUBS	-0.142
172	LH	CONGRUENT	ATYP	PROD	sentCORE	-0.18
172	LH	CONGRUENT	ATYP	PROD	sentHUBS	-0.252
172	LH	CONGRUENT	ATYP	READ	sentCORE	-0.316
172	LH	CONGRUENT	ATYP	READ	sentHUBS	-0.467
173	LH	CONGRUENT	TYP_MILD	LISN	sentCORE	0.234
173	LH	CONGRUENT	TYP_MILD	LISN	sentHUBS	0.344
173	LH	CONGRUENT	TYP_MILD	PROD	sentCORE	0.172
173	LH	CONGRUENT	TYP_MILD	PROD	sentHUBS	0.11
173	LH	CONGRUENT	TYP_MILD	READ	sentCORE	0.169
173	LH	CONGRUENT	TYP_MILD	READ	sentHUBS	0.049
174	LH	CONGRUENT	TYP_MILD	LISN	sentCORE	0.227
174	LH	CONGRUENT	TYP_MILD	LISN	sentHUBS	0.266
174	LH	CONGRUENT	TYP_MILD	PROD	sentCORE	0.253
174	LH	CONGRUENT	TYP_MILD	PROD	sentHUBS	0.412
174	LH	CONGRUENT	TYP_MILD	READ	sentCORE	0.243
174	LH	CONGRUENT	TYP_MILD	READ	sentHUBS	0.497
175	LH	CONGRUENT	TYP_STRONG	LISN	sentCORE	0.279
175	LH	CONGRUENT	TYP_STRONG	LISN	sentHUBS	0.418
175	LH	CONGRUENT	TYP_STRONG	PROD	sentCORE	0.366
175	LH	CONGRUENT	TYP_STRONG	PROD	sentHUBS	0.606
175	LH	CONGRUENT	TYP_STRONG	READ	sentCORE	0.528
175	LH	CONGRUENT	TYP_STRONG	READ	sentHUBS	1.087
176	LH	CROSSED	TYP_STRONG	LISN	sentCORE	-0.03
176	LH	CROSSED	TYP_STRONG	LISN	sentHUBS	-0.069
176	LH	CROSSED	TYP_STRONG	PROD	sentCORE	0.84
176	LH	CROSSED	TYP_STRONG	PROD	sentHUBS	0.9
176	LH	CROSSED	TYP_STRONG	READ	sentCORE	0.292
176	LH	CROSSED	TYP_STRONG	READ	sentHUBS	0.222
177	LH	CONGRUENT	TYP_MILD	LISN	sentCORE	0.207
177	LH	CONGRUENT	TYP_MILD	LISN	sentHUBS	0.386
177	LH	CONGRUENT	TYP_MILD	PROD	sentCORE	0.242
177	LH	CONGRUENT	TYP_MILD	PROD	sentHUBS	0.585
177	LH	CONGRUENT	TYP_MILD	READ	sentCORE	0.156
177	LH	CONGRUENT	TYP_MILD	READ	sentHUBS	0.533
178	LH	CONGRUENT	TYP_STRONG	LISN	sentCORE	0.03
178	LH	CONGRUENT	TYP_STRONG	LISN	sentHUBS	-0.019
178	LH	CONGRUENT	TYP_STRONG	PROD	sentCORE	0.576
178	LH	CONGRUENT	TYP_STRONG	PROD	sentHUBS	0.734
178	LH	CONGRUENT	TYP_STRONG	READ	sentCORE	0.437
178	LH	CONGRUENT	TYP_STRONG	READ	sentHUBS	0.407
179	LH	CONGRUENT	TYP_STRONG	LISN	sentCORE	0.145
179	LH	CONGRUENT	TYP_STRONG	LISN	sentHUBS	0.242
179	LH	CONGRUENT	TYP_STRONG	PROD	sentCORE	0.355
179	LH	CONGRUENT	TYP_STRONG	PROD	sentHUBS	0.745
179	LH	CONGRUENT	TYP_STRONG	READ	sentCORE	0.178
179	LH	CONGRUENT	TYP_STRONG	READ	sentHUBS	0.431
180	LH	CONGRUENT	TYP_STRONG	LISN	sentCORE	0.198
180	LH	CONGRUENT	TYP_STRONG	LISN	sentHUBS	0.343
180	LH	CONGRUENT	TYP_STRONG	PROD	sentCORE	0.405
180	LH	CONGRUENT	TYP_STRONG	PROD	sentHUBS	0.725
180	LH	CONGRUENT	TYP_STRONG	READ	sentCORE	0.025
180	LH	CONGRUENT	TYP_STRONG	READ	sentHUBS	0.226
181	LH	CONGRUENT	TYP_STRONG	LISN	sentCORE	0.349
181	LH	CONGRUENT	TYP_STRONG	LISN	sentHUBS	0.625
181	LH	CONGRUENT	TYP_STRONG	PROD	sentCORE	0.577
181	LH	CONGRUENT	TYP_STRONG	PROD	sentHUBS	0.908
181	LH	CONGRUENT	TYP_STRONG	READ	sentCORE	0.43
181	LH	CONGRUENT	TYP_STRONG	READ	sentHUBS	0.789
182	RH	CONGRUENT	TYP_STRONG	LISN	sentCORE	0.232
182	RH	CONGRUENT	TYP_STRONG	LISN	sentHUBS	0.299
182	RH	CONGRUENT	TYP_STRONG	PROD	sentCORE	0.513
182	RH	CONGRUENT	TYP_STRONG	PROD	sentHUBS	0.696
182	RH	CONGRUENT	TYP_STRONG	READ	sentCORE	0.384
182	RH	CONGRUENT	TYP_STRONG	READ	sentHUBS	0.427
183	RH	CONGRUENT	TYP_MILD	LISN	sentCORE	0.112
183	RH	CONGRUENT	TYP_MILD	LISN	sentHUBS	0.254
183	RH	CONGRUENT	TYP_MILD	PROD	sentCORE	0.202
183	RH	CONGRUENT	TYP_MILD	PROD	sentHUBS	0.48
183	RH	CONGRUENT	TYP_MILD	READ	sentCORE	0.016
183	RH	CONGRUENT	TYP_MILD	READ	sentHUBS	0.155
184	LH	CROSSED	ATYP	LISN	sentCORE	-0.155
184	LH	CROSSED	ATYP	LISN	sentHUBS	-0.34
184	LH	CROSSED	ATYP	PROD	sentCORE	0.106
184	LH	CROSSED	ATYP	PROD	sentHUBS	0.203
184	LH	CROSSED	ATYP	READ	sentCORE	-0.066
184	LH	CROSSED	ATYP	READ	sentHUBS	-0.053
185	LH	CONGRUENT	TYP_MILD	LISN	sentCORE	0.082
185	LH	CONGRUENT	TYP_MILD	LISN	sentHUBS	0.158
185	LH	CONGRUENT	TYP_MILD	PROD	sentCORE	0.316
185	LH	CONGRUENT	TYP_MILD	PROD	sentHUBS	0.655
185	LH	CONGRUENT	TYP_MILD	READ	sentCORE	0.14
185	LH	CONGRUENT	TYP_MILD	READ	sentHUBS	0.564
186	LH	CONGRUENT	ATYP	LISN	sentCORE	-0.111
186	LH	CONGRUENT	ATYP	LISN	sentHUBS	-0.054
186	LH	CONGRUENT	ATYP	PROD	sentCORE	-0.32
186	LH	CONGRUENT	ATYP	PROD	sentHUBS	-0.323
186	LH	CONGRUENT	ATYP	READ	sentCORE	-0.139
186	LH	CONGRUENT	ATYP	READ	sentHUBS	-0.063
187	LH	CONGRUENT	TYP_STRONG	LISN	sentCORE	0.195
187	LH	CONGRUENT	TYP_STRONG	LISN	sentHUBS	0.237
187	LH	CONGRUENT	TYP_STRONG	PROD	sentCORE	0.731
187	LH	CONGRUENT	TYP_STRONG	PROD	sentHUBS	1.06
187	LH	CONGRUENT	TYP_STRONG	READ	sentCORE	0.189
187	LH	CONGRUENT	TYP_STRONG	READ	sentHUBS	0.136
188	LH	CONGRUENT	TYP_STRONG	LISN	sentCORE	0.371
188	LH	CONGRUENT	TYP_STRONG	LISN	sentHUBS	0.616
188	LH	CONGRUENT	TYP_STRONG	PROD	sentCORE	0.468
188	LH	CONGRUENT	TYP_STRONG	PROD	sentHUBS	0.907
188	LH	CONGRUENT	TYP_STRONG	READ	sentCORE	0.581
188	LH	CONGRUENT	TYP_STRONG	READ	sentHUBS	1.067
189	LH	CROSSED	TYP_MILD	LISN	sentCORE	0.07
189	LH	CROSSED	TYP_MILD	LISN	sentHUBS	-0.056
189	LH	CROSSED	TYP_MILD	PROD	sentCORE	0.154
189	LH	CROSSED	TYP_MILD	PROD	sentHUBS	0.088
189	LH	CROSSED	TYP_MILD	READ	sentCORE	0.299
189	LH	CROSSED	TYP_MILD	READ	sentHUBS	0.272
190	RH	CONGRUENT	TYP_MILD	LISN	sentCORE	0.066
190	RH	CONGRUENT	TYP_MILD	LISN	sentHUBS	0.245
190	RH	CONGRUENT	TYP_MILD	PROD	sentCORE	0.179
190	RH	CONGRUENT	TYP_MILD	PROD	sentHUBS	0.57
190	RH	CONGRUENT	TYP_MILD	READ	sentCORE	0.051
190	RH	CONGRUENT	TYP_MILD	READ	sentHUBS	0.278
191	RH	CONGRUENT	TYP_MILD	LISN	sentCORE	0.256
191	RH	CONGRUENT	TYP_MILD	LISN	sentHUBS	0.327
191	RH	CONGRUENT	TYP_MILD	PROD	sentCORE	0.153
191	RH	CONGRUENT	TYP_MILD	PROD	sentHUBS	0.352
191	RH	CONGRUENT	TYP_MILD	READ	sentCORE	0.006
191	RH	CONGRUENT	TYP_MILD	READ	sentHUBS	-0.028
192	RH	CONGRUENT	TYP_MILD	LISN	sentCORE	0.247
192	RH	CONGRUENT	TYP_MILD	LISN	sentHUBS	0.113
192	RH	CONGRUENT	TYP_MILD	PROD	sentCORE	0.34
192	RH	CONGRUENT	TYP_MILD	PROD	sentHUBS	0.454
192	RH	CONGRUENT	TYP_MILD	READ	sentCORE	0.304
192	RH	CONGRUENT	TYP_MILD	READ	sentHUBS	0.198
193	RH	CONGRUENT	TYP_STRONG	LISN	sentCORE	0.621
193	RH	CONGRUENT	TYP_STRONG	LISN	sentHUBS	0.968
193	RH	CONGRUENT	TYP_STRONG	PROD	sentCORE	0.804
193	RH	CONGRUENT	TYP_STRONG	PROD	sentHUBS	1.15
193	RH	CONGRUENT	TYP_STRONG	READ	sentCORE	0.455
193	RH	CONGRUENT	TYP_STRONG	READ	sentHUBS	0.758
194	RH	CONGRUENT	TYP_MILD	LISN	sentCORE	0.206
194	RH	CONGRUENT	TYP_MILD	LISN	sentHUBS	0.479
194	RH	CONGRUENT	TYP_MILD	PROD	sentCORE	0.152
194	RH	CONGRUENT	TYP_MILD	PROD	sentHUBS	0.287
194	RH	CONGRUENT	TYP_MILD	READ	sentCORE	0.157
194	RH	CONGRUENT	TYP_MILD	READ	sentHUBS	0.281
195	RH	CONGRUENT	TYP_MILD	LISN	sentCORE	-0.009
195	RH	CONGRUENT	TYP_MILD	LISN	sentHUBS	0.147
195	RH	CONGRUENT	TYP_MILD	PROD	sentCORE	0.408
195	RH	CONGRUENT	TYP_MILD	PROD	sentHUBS	0.554
195	RH	CONGRUENT	TYP_MILD	READ	sentCORE	0.146
195	RH	CONGRUENT	TYP_MILD	READ	sentHUBS	0.43
196	RH	CONGRUENT	TYP_MILD	LISN	sentCORE	0.102
196	RH	CONGRUENT	TYP_MILD	LISN	sentHUBS	0.193
196	RH	CONGRUENT	TYP_MILD	PROD	sentCORE	0.447
196	RH	CONGRUENT	TYP_MILD	PROD	sentHUBS	0.632
196	RH	CONGRUENT	TYP_MILD	READ	sentCORE	0.006
196	RH	CONGRUENT	TYP_MILD	READ	sentHUBS	0.037
197	RH	CONGRUENT	TYP_STRONG	LISN	sentCORE	0.43
197	RH	CONGRUENT	TYP_STRONG	LISN	sentHUBS	0.443
197	RH	CONGRUENT	TYP_STRONG	PROD	sentCORE	0.414
197	RH	CONGRUENT	TYP_STRONG	PROD	sentHUBS	0.512
197	RH	CONGRUENT	TYP_STRONG	READ	sentCORE	0.127
197	RH	CONGRUENT	TYP_STRONG	READ	sentHUBS	0.118
198	RH	CONGRUENT	TYP_MILD	LISN	sentCORE	0.174
198	RH	CONGRUENT	TYP_MILD	LISN	sentHUBS	0.277
198	RH	CONGRUENT	TYP_MILD	PROD	sentCORE	0.191
198	RH	CONGRUENT	TYP_MILD	PROD	sentHUBS	0.348
198	RH	CONGRUENT	TYP_MILD	READ	sentCORE	0.066
198	RH	CONGRUENT	TYP_MILD	READ	sentHUBS	0.338
199	RH	CONGRUENT	TYP_MILD	LISN	sentCORE	0.259
199	RH	CONGRUENT	TYP_MILD	LISN	sentHUBS	0.388
199	RH	CONGRUENT	TYP_MILD	PROD	sentCORE	0.213
199	RH	CONGRUENT	TYP_MILD	PROD	sentHUBS	0.201
199	RH	CONGRUENT	TYP_MILD	READ	sentCORE	0.322
199	RH	CONGRUENT	TYP_MILD	READ	sentHUBS	0.529
200	RH	CONGRUENT	TYP_STRONG	LISN	sentCORE	0.47
200	RH	CONGRUENT	TYP_STRONG	LISN	sentHUBS	0.524
200	RH	CONGRUENT	TYP_STRONG	PROD	sentCORE	0.583
200	RH	CONGRUENT	TYP_STRONG	PROD	sentHUBS	0.701
200	RH	CONGRUENT	TYP_STRONG	READ	sentCORE	0.628
200	RH	CONGRUENT	TYP_STRONG	READ	sentHUBS	0.863
201	RH	CONGRUENT	TYP_MILD	LISN	sentCORE	0.1
201	RH	CONGRUENT	TYP_MILD	LISN	sentHUBS	0.107
201	RH	CONGRUENT	TYP_MILD	PROD	sentCORE	0.463
201	RH	CONGRUENT	TYP_MILD	PROD	sentHUBS	0.607
201	RH	CONGRUENT	TYP_MILD	READ	sentCORE	0.134
201	RH	CONGRUENT	TYP_MILD	READ	sentHUBS	0.039
202	RH	CONGRUENT	TYP_STRONG	LISN	sentCORE	0.264
202	RH	CONGRUENT	TYP_STRONG	LISN	sentHUBS	0.519
202	RH	CONGRUENT	TYP_STRONG	PROD	sentCORE	0.613
202	RH	CONGRUENT	TYP_STRONG	PROD	sentHUBS	0.892
202	RH	CONGRUENT	TYP_STRONG	READ	sentCORE	0.283
202	RH	CONGRUENT	TYP_STRONG	READ	sentHUBS	0.438
203	RH	CONGRUENT	TYP_MILD	LISN	sentCORE	0.022
203	RH	CONGRUENT	TYP_MILD	LISN	sentHUBS	0.069
203	RH	CONGRUENT	TYP_MILD	PROD	sentCORE	0.285
203	RH	CONGRUENT	TYP_MILD	PROD	sentHUBS	0.598
203	RH	CONGRUENT	TYP_MILD	READ	sentCORE	0.168
203	RH	CONGRUENT	TYP_MILD	READ	sentHUBS	0.21
204	RH	CONGRUENT	TYP_MILD	LISN	sentCORE	0.189
204	RH	CONGRUENT	TYP_MILD	LISN	sentHUBS	0.314
204	RH	CONGRUENT	TYP_MILD	PROD	sentCORE	0.272
204	RH	CONGRUENT	TYP_MILD	PROD	sentHUBS	0.3
204	RH	CONGRUENT	TYP_MILD	READ	sentCORE	0.207
204	RH	CONGRUENT	TYP_MILD	READ	sentHUBS	0.251
205	RH	CONGRUENT	TYP_STRONG	LISN	sentCORE	0.094
205	RH	CONGRUENT	TYP_STRONG	LISN	sentHUBS	0.314
205	RH	CONGRUENT	TYP_STRONG	PROD	sentCORE	0.394
205	RH	CONGRUENT	TYP_STRONG	PROD	sentHUBS	0.7
205	RH	CONGRUENT	TYP_STRONG	READ	sentCORE	0.397
205	RH	CONGRUENT	TYP_STRONG	READ	sentHUBS	0.555
206	RH	CONGRUENT	TYP_STRONG	LISN	sentCORE	0.191
206	RH	CONGRUENT	TYP_STRONG	LISN	sentHUBS	0.327
206	RH	CONGRUENT	TYP_STRONG	PROD	sentCORE	0.262
206	RH	CONGRUENT	TYP_STRONG	PROD	sentHUBS	0.567
206	RH	CONGRUENT	TYP_STRONG	READ	sentCORE	0.389
206	RH	CONGRUENT	TYP_STRONG	READ	sentHUBS	0.578
207	RH	CONGRUENT	TYP_STRONG	LISN	sentCORE	0.319
207	RH	CONGRUENT	TYP_STRONG	LISN	sentHUBS	0.207
207	RH	CONGRUENT	TYP_STRONG	PROD	sentCORE	0.559
207	RH	CONGRUENT	TYP_STRONG	PROD	sentHUBS	0.77
207	RH	CONGRUENT	TYP_STRONG	READ	sentCORE	0.418
207	RH	CONGRUENT	TYP_STRONG	READ	sentHUBS	0.323
208	RH	CONGRUENT	TYP_STRONG	LISN	sentCORE	0.337
208	RH	CONGRUENT	TYP_STRONG	LISN	sentHUBS	0.469
208	RH	CONGRUENT	TYP_STRONG	PROD	sentCORE	0.867
208	RH	CONGRUENT	TYP_STRONG	PROD	sentHUBS	1.419
208	RH	CONGRUENT	TYP_STRONG	READ	sentCORE	0.821
208	RH	CONGRUENT	TYP_STRONG	READ	sentHUBS	1.693
209	LH	CONGRUENT	TYP_MILD	LISN	sentCORE	0.085
209	LH	CONGRUENT	TYP_MILD	LISN	sentHUBS	0.149
209	LH	CONGRUENT	TYP_MILD	PROD	sentCORE	0.271
209	LH	CONGRUENT	TYP_MILD	PROD	sentHUBS	0.641
209	LH	CONGRUENT	TYP_MILD	READ	sentCORE	0.044
209	LH	CONGRUENT	TYP_MILD	READ	sentHUBS	0.332
210	RH	CONGRUENT	TYP_MILD	LISN	sentCORE	0.14
210	RH	CONGRUENT	TYP_MILD	LISN	sentHUBS	0.042
210	RH	CONGRUENT	TYP_MILD	PROD	sentCORE	0.325
210	RH	CONGRUENT	TYP_MILD	PROD	sentHUBS	0.223
210	RH	CONGRUENT	TYP_MILD	READ	sentCORE	0.197
210	RH	CONGRUENT	TYP_MILD	READ	sentHUBS	0.196
211	RH	CONGRUENT	TYP_STRONG	LISN	sentCORE	0.416
211	RH	CONGRUENT	TYP_STRONG	LISN	sentHUBS	0.585
211	RH	CONGRUENT	TYP_STRONG	PROD	sentCORE	0.768
211	RH	CONGRUENT	TYP_STRONG	PROD	sentHUBS	0.898
211	RH	CONGRUENT	TYP_STRONG	READ	sentCORE	0.032
211	RH	CONGRUENT	TYP_STRONG	READ	sentHUBS	0.135
212	RH	CONGRUENT	TYP_STRONG	LISN	sentCORE	0.372
212	RH	CONGRUENT	TYP_STRONG	LISN	sentHUBS	0.4
212	RH	CONGRUENT	TYP_STRONG	PROD	sentCORE	0.493
212	RH	CONGRUENT	TYP_STRONG	PROD	sentHUBS	0.587
212	RH	CONGRUENT	TYP_STRONG	READ	sentCORE	0.297
212	RH	CONGRUENT	TYP_STRONG	READ	sentHUBS	0.217
213	RH	CONGRUENT	TYP_MILD	LISN	sentCORE	0.18
213	RH	CONGRUENT	TYP_MILD	LISN	sentHUBS	0.343
213	RH	CONGRUENT	TYP_MILD	PROD	sentCORE	0.366
213	RH	CONGRUENT	TYP_MILD	PROD	sentHUBS	0.507
213	RH	CONGRUENT	TYP_MILD	READ	sentCORE	0.216
213	RH	CONGRUENT	TYP_MILD	READ	sentHUBS	0.318
214	RH	CROSSED	ATYP	LISN	sentCORE	0.002
214	RH	CROSSED	ATYP	LISN	sentHUBS	-0.249
214	RH	CROSSED	ATYP	PROD	sentCORE	0.13
214	RH	CROSSED	ATYP	PROD	sentHUBS	0.054
214	RH	CROSSED	ATYP	READ	sentCORE	-0.006
214	RH	CROSSED	ATYP	READ	sentHUBS	-0.311
215	RH	CONGRUENT	TYP_STRONG	LISN	sentCORE	0.356
215	RH	CONGRUENT	TYP_STRONG	LISN	sentHUBS	0.504
215	RH	CONGRUENT	TYP_STRONG	PROD	sentCORE	0.578
215	RH	CONGRUENT	TYP_STRONG	PROD	sentHUBS	0.802
215	RH	CONGRUENT	TYP_STRONG	READ	sentCORE	0.226
215	RH	CONGRUENT	TYP_STRONG	READ	sentHUBS	0.61
216	RH	CONGRUENT	TYP_STRONG	LISN	sentCORE	0.229
216	RH	CONGRUENT	TYP_STRONG	LISN	sentHUBS	0.189
216	RH	CONGRUENT	TYP_STRONG	PROD	sentCORE	0.353
216	RH	CONGRUENT	TYP_STRONG	PROD	sentHUBS	0.69
216	RH	CONGRUENT	TYP_STRONG	READ	sentCORE	0.174
216	RH	CONGRUENT	TYP_STRONG	READ	sentHUBS	0.331
217	RH	CONGRUENT	TYP_STRONG	LISN	sentCORE	0.289
217	RH	CONGRUENT	TYP_STRONG	LISN	sentHUBS	0.416
217	RH	CONGRUENT	TYP_STRONG	PROD	sentCORE	0.647
217	RH	CONGRUENT	TYP_STRONG	PROD	sentHUBS	0.867
217	RH	CONGRUENT	TYP_STRONG	READ	sentCORE	0.357
217	RH	CONGRUENT	TYP_STRONG	READ	sentHUBS	0.427
218	LH	CONGRUENT	ATYP	LISN	sentCORE	-0.71
218	LH	CONGRUENT	ATYP	LISN	sentHUBS	-1.092
218	LH	CONGRUENT	ATYP	PROD	sentCORE	-0.539
218	LH	CONGRUENT	ATYP	PROD	sentHUBS	-1.207
218	LH	CONGRUENT	ATYP	READ	sentCORE	-0.613
218	LH	CONGRUENT	ATYP	READ	sentHUBS	-1.366
219	RH	CONGRUENT	TYP_MILD	LISN	sentCORE	0.231
219	RH	CONGRUENT	TYP_MILD	LISN	sentHUBS	0.132
219	RH	CONGRUENT	TYP_MILD	PROD	sentCORE	0.497
219	RH	CONGRUENT	TYP_MILD	PROD	sentHUBS	0.683
219	RH	CONGRUENT	TYP_MILD	READ	sentCORE	0.09
219	RH	CONGRUENT	TYP_MILD	READ	sentHUBS	0.016
220	RH	CONGRUENT	TYP_STRONG	LISN	sentCORE	0.368
220	RH	CONGRUENT	TYP_STRONG	LISN	sentHUBS	0.487
220	RH	CONGRUENT	TYP_STRONG	PROD	sentCORE	0.386
220	RH	CONGRUENT	TYP_STRONG	PROD	sentHUBS	0.614
220	RH	CONGRUENT	TYP_STRONG	READ	sentCORE	0.534
220	RH	CONGRUENT	TYP_STRONG	READ	sentHUBS	0.573
221	RH	CONGRUENT	TYP_STRONG	LISN	sentCORE	0.194
221	RH	CONGRUENT	TYP_STRONG	LISN	sentHUBS	0.184
221	RH	CONGRUENT	TYP_STRONG	PROD	sentCORE	0.759
221	RH	CONGRUENT	TYP_STRONG	PROD	sentHUBS	0.959
221	RH	CONGRUENT	TYP_STRONG	READ	sentCORE	0.32
221	RH	CONGRUENT	TYP_STRONG	READ	sentHUBS	0.274
222	RH	CONGRUENT	TYP_STRONG	LISN	sentCORE	0.437
222	RH	CONGRUENT	TYP_STRONG	LISN	sentHUBS	0.513
222	RH	CONGRUENT	TYP_STRONG	PROD	sentCORE	0.729
222	RH	CONGRUENT	TYP_STRONG	PROD	sentHUBS	1.077
222	RH	CONGRUENT	TYP_STRONG	READ	sentCORE	0.47
222	RH	CONGRUENT	TYP_STRONG	READ	sentHUBS	0.691
223	RH	CONGRUENT	TYP_MILD	LISN	sentCORE	0.237
223	RH	CONGRUENT	TYP_MILD	LISN	sentHUBS	0.381
223	RH	CONGRUENT	TYP_MILD	PROD	sentCORE	0.263
223	RH	CONGRUENT	TYP_MILD	PROD	sentHUBS	0.467
223	RH	CONGRUENT	TYP_MILD	READ	sentCORE	0.297
223	RH	CONGRUENT	TYP_MILD	READ	sentHUBS	0.284
224	RH	CROSSED	TYP_MILD	LISN	sentCORE	0.18
224	RH	CROSSED	TYP_MILD	LISN	sentHUBS	0.012
224	RH	CROSSED	TYP_MILD	PROD	sentCORE	0.254
224	RH	CROSSED	TYP_MILD	PROD	sentHUBS	0.43
224	RH	CROSSED	TYP_MILD	READ	sentCORE	0.087
224	RH	CROSSED	TYP_MILD	READ	sentHUBS	-0.438
225	RH	CONGRUENT	TYP_STRONG	LISN	sentCORE	0.451
225	RH	CONGRUENT	TYP_STRONG	LISN	sentHUBS	0.624
225	RH	CONGRUENT	TYP_STRONG	PROD	sentCORE	0.732
225	RH	CONGRUENT	TYP_STRONG	PROD	sentHUBS	0.944
225	RH	CONGRUENT	TYP_STRONG	READ	sentCORE	0.21
225	RH	CONGRUENT	TYP_STRONG	READ	sentHUBS	0.519
226	RH	CONGRUENT	TYP_MILD	LISN	sentCORE	0.181
226	RH	CONGRUENT	TYP_MILD	LISN	sentHUBS	0.299
226	RH	CONGRUENT	TYP_MILD	PROD	sentCORE	0.518
226	RH	CONGRUENT	TYP_MILD	PROD	sentHUBS	0.58
226	RH	CONGRUENT	TYP_MILD	READ	sentCORE	0.268
226	RH	CONGRUENT	TYP_MILD	READ	sentHUBS	0.377
227	RH	CONGRUENT	TYP_MILD	LISN	sentCORE	0.113
227	RH	CONGRUENT	TYP_MILD	LISN	sentHUBS	0.245
227	RH	CONGRUENT	TYP_MILD	PROD	sentCORE	0.499
227	RH	CONGRUENT	TYP_MILD	PROD	sentHUBS	0.763
227	RH	CONGRUENT	TYP_MILD	READ	sentCORE	0.125
227	RH	CONGRUENT	TYP_MILD	READ	sentHUBS	0.402
228	RH	CONGRUENT	TYP_MILD	LISN	sentCORE	0.193
228	RH	CONGRUENT	TYP_MILD	LISN	sentHUBS	0.062
228	RH	CONGRUENT	TYP_MILD	PROD	sentCORE	0.265
228	RH	CONGRUENT	TYP_MILD	PROD	sentHUBS	0.266
228	RH	CONGRUENT	TYP_MILD	READ	sentCORE	0.276
228	RH	CONGRUENT	TYP_MILD	READ	sentHUBS	0.425
229	RH	CONGRUENT	TYP_STRONG	LISN	sentCORE	0.287
229	RH	CONGRUENT	TYP_STRONG	LISN	sentHUBS	0.566
229	RH	CONGRUENT	TYP_STRONG	PROD	sentCORE	0.948
229	RH	CONGRUENT	TYP_STRONG	PROD	sentHUBS	1.287
229	RH	CONGRUENT	TYP_STRONG	READ	sentCORE	0.36
229	RH	CONGRUENT	TYP_STRONG	READ	sentHUBS	0.55
230	RH	CONGRUENT	TYP_STRONG	LISN	sentCORE	0.277
230	RH	CONGRUENT	TYP_STRONG	LISN	sentHUBS	0.206
230	RH	CONGRUENT	TYP_STRONG	PROD	sentCORE	0.464
230	RH	CONGRUENT	TYP_STRONG	PROD	sentHUBS	0.459
230	RH	CONGRUENT	TYP_STRONG	READ	sentCORE	0.383
230	RH	CONGRUENT	TYP_STRONG	READ	sentHUBS	0.438
231	RH	CONGRUENT	TYP_STRONG	LISN	sentCORE	0.441
231	RH	CONGRUENT	TYP_STRONG	LISN	sentHUBS	0.742
231	RH	CONGRUENT	TYP_STRONG	PROD	sentCORE	0.467
231	RH	CONGRUENT	TYP_STRONG	PROD	sentHUBS	0.558
231	RH	CONGRUENT	TYP_STRONG	READ	sentCORE	0.348
231	RH	CONGRUENT	TYP_STRONG	READ	sentHUBS	0.667
232	RH	CONGRUENT	TYP_STRONG	LISN	sentCORE	0.307
232	RH	CONGRUENT	TYP_STRONG	LISN	sentHUBS	0.349
232	RH	CONGRUENT	TYP_STRONG	PROD	sentCORE	0.572
232	RH	CONGRUENT	TYP_STRONG	PROD	sentHUBS	0.625
232	RH	CONGRUENT	TYP_STRONG	READ	sentCORE	0.184
232	RH	CONGRUENT	TYP_STRONG	READ	sentHUBS	0.201
233	RH	CONGRUENT	TYP_STRONG	LISN	sentCORE	0.24
233	RH	CONGRUENT	TYP_STRONG	LISN	sentHUBS	0.161
233	RH	CONGRUENT	TYP_STRONG	PROD	sentCORE	0.591
233	RH	CONGRUENT	TYP_STRONG	PROD	sentHUBS	0.774
233	RH	CONGRUENT	TYP_STRONG	READ	sentCORE	0.528
233	RH	CONGRUENT	TYP_STRONG	READ	sentHUBS	0.447
234	RH	CROSSED	TYP_MILD	LISN	sentCORE	0.186
234	RH	CROSSED	TYP_MILD	LISN	sentHUBS	0.112
234	RH	CROSSED	TYP_MILD	PROD	sentCORE	0.005
234	RH	CROSSED	TYP_MILD	PROD	sentHUBS	-0.081
234	RH	CROSSED	TYP_MILD	READ	sentCORE	0.036
234	RH	CROSSED	TYP_MILD	READ	sentHUBS	-0.07
235	RH	CONGRUENT	TYP_STRONG	LISN	sentCORE	0.292
235	RH	CONGRUENT	TYP_STRONG	LISN	sentHUBS	0.446
235	RH	CONGRUENT	TYP_STRONG	PROD	sentCORE	0.424
235	RH	CONGRUENT	TYP_STRONG	PROD	sentHUBS	0.644
235	RH	CONGRUENT	TYP_STRONG	READ	sentCORE	0.297
235	RH	CONGRUENT	TYP_STRONG	READ	sentHUBS	0.474
236	RH	CONGRUENT	TYP_STRONG	LISN	sentCORE	0.177
236	RH	CONGRUENT	TYP_STRONG	LISN	sentHUBS	0.24
236	RH	CONGRUENT	TYP_STRONG	PROD	sentCORE	0.34
236	RH	CONGRUENT	TYP_STRONG	PROD	sentHUBS	0.478
236	RH	CONGRUENT	TYP_STRONG	READ	sentCORE	0.497
236	RH	CONGRUENT	TYP_STRONG	READ	sentHUBS	0.604
237	RH	CONGRUENT	TYP_MILD	LISN	sentCORE	0.226
237	RH	CONGRUENT	TYP_MILD	LISN	sentHUBS	0.122
237	RH	CONGRUENT	TYP_MILD	PROD	sentCORE	0.069
237	RH	CONGRUENT	TYP_MILD	PROD	sentHUBS	0.011
237	RH	CONGRUENT	TYP_MILD	READ	sentCORE	0.277
237	RH	CONGRUENT	TYP_MILD	READ	sentHUBS	0.247
238	LH	CONGRUENT	TYP_STRONG	LISN	sentCORE	0.465
238	LH	CONGRUENT	TYP_STRONG	LISN	sentHUBS	0.631
238	LH	CONGRUENT	TYP_STRONG	PROD	sentCORE	0.699
238	LH	CONGRUENT	TYP_STRONG	PROD	sentHUBS	0.952
238	LH	CONGRUENT	TYP_STRONG	READ	sentCORE	0.418
238	LH	CONGRUENT	TYP_STRONG	READ	sentHUBS	0.688
239	LH	CONGRUENT	TYP_STRONG	LISN	sentCORE	0.192
239	LH	CONGRUENT	TYP_STRONG	LISN	sentHUBS	0.243
239	LH	CONGRUENT	TYP_STRONG	PROD	sentCORE	0.551
239	LH	CONGRUENT	TYP_STRONG	PROD	sentHUBS	0.559
239	LH	CONGRUENT	TYP_STRONG	READ	sentCORE	0.236
239	LH	CONGRUENT	TYP_STRONG	READ	sentHUBS	0.253
240	LH	CONGRUENT	TYP_MILD	LISN	sentCORE	0.139
240	LH	CONGRUENT	TYP_MILD	LISN	sentHUBS	0.223
240	LH	CONGRUENT	TYP_MILD	PROD	sentCORE	0.224
240	LH	CONGRUENT	TYP_MILD	PROD	sentHUBS	0.196
240	LH	CONGRUENT	TYP_MILD	READ	sentCORE	0.246
240	LH	CONGRUENT	TYP_MILD	READ	sentHUBS	0.36
241	LH	CONGRUENT	TYP_STRONG	LISN	sentCORE	0.17
241	LH	CONGRUENT	TYP_STRONG	LISN	sentHUBS	0.298
241	LH	CONGRUENT	TYP_STRONG	PROD	sentCORE	0.632
241	LH	CONGRUENT	TYP_STRONG	PROD	sentHUBS	0.871
241	LH	CONGRUENT	TYP_STRONG	READ	sentCORE	0.271
241	LH	CONGRUENT	TYP_STRONG	READ	sentHUBS	0.389
242	LH	CROSSED	TYP_MILD	LISN	sentCORE	0.059
242	LH	CROSSED	TYP_MILD	LISN	sentHUBS	-0.054
242	LH	CROSSED	TYP_MILD	PROD	sentCORE	0.43
242	LH	CROSSED	TYP_MILD	PROD	sentHUBS	0.415
242	LH	CROSSED	TYP_MILD	READ	sentCORE	0.082
242	LH	CROSSED	TYP_MILD	READ	sentHUBS	-0.091
243	RH	CONGRUENT	TYP_MILD	LISN	sentCORE	0.161
243	RH	CONGRUENT	TYP_MILD	LISN	sentHUBS	0.47
243	RH	CONGRUENT	TYP_MILD	PROD	sentCORE	0.458
243	RH	CONGRUENT	TYP_MILD	PROD	sentHUBS	0.693
243	RH	CONGRUENT	TYP_MILD	READ	sentCORE	0.585
243	RH	CONGRUENT	TYP_MILD	READ	sentHUBS	0.923
244	LH	CONGRUENT	TYP_MILD	LISN	sentCORE	0.09
244	LH	CONGRUENT	TYP_MILD	LISN	sentHUBS	0.005
244	LH	CONGRUENT	TYP_MILD	PROD	sentCORE	0.518
244	LH	CONGRUENT	TYP_MILD	PROD	sentHUBS	0.55
244	LH	CONGRUENT	TYP_MILD	READ	sentCORE	0.068
244	LH	CONGRUENT	TYP_MILD	READ	sentHUBS	-0.003
245	RH	CONGRUENT	TYP_STRONG	LISN	sentCORE	0.329
245	RH	CONGRUENT	TYP_STRONG	LISN	sentHUBS	0.377
245	RH	CONGRUENT	TYP_STRONG	PROD	sentCORE	0.624
245	RH	CONGRUENT	TYP_STRONG	PROD	sentHUBS	0.942
245	RH	CONGRUENT	TYP_STRONG	READ	sentCORE	0.527
245	RH	CONGRUENT	TYP_STRONG	READ	sentHUBS	0.668
246	LH	CONGRUENT	TYP_MILD	LISN	sentCORE	-0.038
246	LH	CONGRUENT	TYP_MILD	LISN	sentHUBS	0.079
246	LH	CONGRUENT	TYP_MILD	PROD	sentCORE	0.064
246	LH	CONGRUENT	TYP_MILD	PROD	sentHUBS	0.467
246	LH	CONGRUENT	TYP_MILD	READ	sentCORE	0.111
246	LH	CONGRUENT	TYP_MILD	READ	sentHUBS	0.199
247	RH	CONGRUENT	TYP_STRONG	LISN	sentCORE	0.186
247	RH	CONGRUENT	TYP_STRONG	LISN	sentHUBS	0.391
247	RH	CONGRUENT	TYP_STRONG	PROD	sentCORE	0.433
247	RH	CONGRUENT	TYP_STRONG	PROD	sentHUBS	0.66
247	RH	CONGRUENT	TYP_STRONG	READ	sentCORE	0.288
247	RH	CONGRUENT	TYP_STRONG	READ	sentHUBS	0.455
248	RH	CONGRUENT	TYP_STRONG	LISN	sentCORE	0.425
248	RH	CONGRUENT	TYP_STRONG	LISN	sentHUBS	0.547
248	RH	CONGRUENT	TYP_STRONG	PROD	sentCORE	0.608
248	RH	CONGRUENT	TYP_STRONG	PROD	sentHUBS	0.856
248	RH	CONGRUENT	TYP_STRONG	READ	sentCORE	0.585
248	RH	CONGRUENT	TYP_STRONG	READ	sentHUBS	0.823
249	RH	CONGRUENT	TYP_MILD	LISN	sentCORE	0.237
249	RH	CONGRUENT	TYP_MILD	LISN	sentHUBS	0.44
249	RH	CONGRUENT	TYP_MILD	PROD	sentCORE	0.197
249	RH	CONGRUENT	TYP_MILD	PROD	sentHUBS	0.278
249	RH	CONGRUENT	TYP_MILD	READ	sentCORE	0.332
249	RH	CONGRUENT	TYP_MILD	READ	sentHUBS	0.615
250	RH	CONGRUENT	TYP_STRONG	LISN	sentCORE	0.44
250	RH	CONGRUENT	TYP_STRONG	LISN	sentHUBS	0.588
250	RH	CONGRUENT	TYP_STRONG	PROD	sentCORE	0.843
250	RH	CONGRUENT	TYP_STRONG	PROD	sentHUBS	1.079
250	RH	CONGRUENT	TYP_STRONG	READ	sentCORE	0.789
250	RH	CONGRUENT	TYP_STRONG	READ	sentHUBS	1.233
251	RH	CONGRUENT	TYP_MILD	LISN	sentCORE	0.189
251	RH	CONGRUENT	TYP_MILD	LISN	sentHUBS	0.093
251	RH	CONGRUENT	TYP_MILD	PROD	sentCORE	0.243
251	RH	CONGRUENT	TYP_MILD	PROD	sentHUBS	0.255
251	RH	CONGRUENT	TYP_MILD	READ	sentCORE	0.308
251	RH	CONGRUENT	TYP_MILD	READ	sentHUBS	0.266
252	RH	CONGRUENT	TYP_STRONG	LISN	sentCORE	0.422
252	RH	CONGRUENT	TYP_STRONG	LISN	sentHUBS	0.525
252	RH	CONGRUENT	TYP_STRONG	PROD	sentCORE	0.603
252	RH	CONGRUENT	TYP_STRONG	PROD	sentHUBS	0.853
252	RH	CONGRUENT	TYP_STRONG	READ	sentCORE	0.323
252	RH	CONGRUENT	TYP_STRONG	READ	sentHUBS	0.375
253	LH	CONGRUENT	TYP_STRONG	LISN	sentCORE	0.211
253	LH	CONGRUENT	TYP_STRONG	LISN	sentHUBS	0.366
253	LH	CONGRUENT	TYP_STRONG	PROD	sentCORE	0.563
253	LH	CONGRUENT	TYP_STRONG	PROD	sentHUBS	0.934
253	LH	CONGRUENT	TYP_STRONG	READ	sentCORE	0.118
253	LH	CONGRUENT	TYP_STRONG	READ	sentHUBS	0.266
254	LH	CONGRUENT	TYP_STRONG	LISN	sentCORE	0.179
254	LH	CONGRUENT	TYP_STRONG	LISN	sentHUBS	0.431
254	LH	CONGRUENT	TYP_STRONG	PROD	sentCORE	0.429
254	LH	CONGRUENT	TYP_STRONG	PROD	sentHUBS	0.843
254	LH	CONGRUENT	TYP_STRONG	READ	sentCORE	0.179
254	LH	CONGRUENT	TYP_STRONG	READ	sentHUBS	0.56
255	RH	CONGRUENT	TYP_MILD	LISN	sentCORE	0.109
255	RH	CONGRUENT	TYP_MILD	LISN	sentHUBS	0.025
255	RH	CONGRUENT	TYP_MILD	PROD	sentCORE	0.347
255	RH	CONGRUENT	TYP_MILD	PROD	sentHUBS	0.664
255	RH	CONGRUENT	TYP_MILD	READ	sentCORE	0.21
255	RH	CONGRUENT	TYP_MILD	READ	sentHUBS	0.393
256	LH	CONGRUENT	TYP_STRONG	LISN	sentCORE	0.219
256	LH	CONGRUENT	TYP_STRONG	LISN	sentHUBS	0.284
256	LH	CONGRUENT	TYP_STRONG	PROD	sentCORE	0.473
256	LH	CONGRUENT	TYP_STRONG	PROD	sentHUBS	0.598
256	LH	CONGRUENT	TYP_STRONG	READ	sentCORE	0.249
256	LH	CONGRUENT	TYP_STRONG	READ	sentHUBS	0.126
257	RH	CONGRUENT	TYP_MILD	LISN	sentCORE	0.075
257	RH	CONGRUENT	TYP_MILD	LISN	sentHUBS	0.07
257	RH	CONGRUENT	TYP_MILD	PROD	sentCORE	0.306
257	RH	CONGRUENT	TYP_MILD	PROD	sentHUBS	0.248
257	RH	CONGRUENT	TYP_MILD	READ	sentCORE	-0.003
257	RH	CONGRUENT	TYP_MILD	READ	sentHUBS	-0.033
258	LH	CONGRUENT	ATYP	LISN	sentCORE	-0.353
258	LH	CONGRUENT	ATYP	LISN	sentHUBS	-0.29
258	LH	CONGRUENT	ATYP	PROD	sentCORE	-0.235
258	LH	CONGRUENT	ATYP	PROD	sentHUBS	-0.141
258	LH	CONGRUENT	ATYP	READ	sentCORE	-0.262
258	LH	CONGRUENT	ATYP	READ	sentHUBS	-0.293
259	LH	CONGRUENT	TYP_MILD	LISN	sentCORE	0.348
259	LH	CONGRUENT	TYP_MILD	LISN	sentHUBS	0.415
259	LH	CONGRUENT	TYP_MILD	PROD	sentCORE	0.3
259	LH	CONGRUENT	TYP_MILD	PROD	sentHUBS	0.32
259	LH	CONGRUENT	TYP_MILD	READ	sentCORE	0.5
259	LH	CONGRUENT	TYP_MILD	READ	sentHUBS	0.646
260	LH	CONGRUENT	TYP_MILD	LISN	sentCORE	0.375
260	LH	CONGRUENT	TYP_MILD	LISN	sentHUBS	0.395
260	LH	CONGRUENT	TYP_MILD	PROD	sentCORE	0.184
260	LH	CONGRUENT	TYP_MILD	PROD	sentHUBS	0.115
260	LH	CONGRUENT	TYP_MILD	READ	sentCORE	0.331
260	LH	CONGRUENT	TYP_MILD	READ	sentHUBS	0.357
261	LH	CONGRUENT	ATYP	LISN	sentCORE	-0.212
261	LH	CONGRUENT	ATYP	LISN	sentHUBS	-0.304
261	LH	CONGRUENT	ATYP	PROD	sentCORE	-0.495
261	LH	CONGRUENT	ATYP	PROD	sentHUBS	-0.325
261	LH	CONGRUENT	ATYP	READ	sentCORE	-0.13
261	LH	CONGRUENT	ATYP	READ	sentHUBS	-0.254
262	RH	CONGRUENT	TYP_STRONG	LISN	sentCORE	0.15
262	RH	CONGRUENT	TYP_STRONG	LISN	sentHUBS	0.419
262	RH	CONGRUENT	TYP_STRONG	PROD	sentCORE	0.506
262	RH	CONGRUENT	TYP_STRONG	PROD	sentHUBS	0.927
262	RH	CONGRUENT	TYP_STRONG	READ	sentCORE	0.184
262	RH	CONGRUENT	TYP_STRONG	READ	sentHUBS	0.473
263	RH	CONGRUENT	TYP_STRONG	LISN	sentCORE	0.334
263	RH	CONGRUENT	TYP_STRONG	LISN	sentHUBS	0.364
263	RH	CONGRUENT	TYP_STRONG	PROD	sentCORE	0.263
263	RH	CONGRUENT	TYP_STRONG	PROD	sentHUBS	0.484
263	RH	CONGRUENT	TYP_STRONG	READ	sentCORE	0.181
263	RH	CONGRUENT	TYP_STRONG	READ	sentHUBS	0.093
264	LH	CONGRUENT	ATYP	LISN	sentCORE	-0.223
264	LH	CONGRUENT	ATYP	LISN	sentHUBS	-0.236
264	LH	CONGRUENT	ATYP	PROD	sentCORE	-0.372
264	LH	CONGRUENT	ATYP	PROD	sentHUBS	-0.36
264	LH	CONGRUENT	ATYP	READ	sentCORE	-0.262
264	LH	CONGRUENT	ATYP	READ	sentHUBS	-0.358
265	RH	CONGRUENT	TYP_STRONG	LISN	sentCORE	0.546
265	RH	CONGRUENT	TYP_STRONG	LISN	sentHUBS	0.683
265	RH	CONGRUENT	TYP_STRONG	PROD	sentCORE	0.681
265	RH	CONGRUENT	TYP_STRONG	PROD	sentHUBS	1.079
265	RH	CONGRUENT	TYP_STRONG	READ	sentCORE	0.533
265	RH	CONGRUENT	TYP_STRONG	READ	sentHUBS	0.844
266	LH	CONGRUENT	TYP_MILD	LISN	sentCORE	0.261
266	LH	CONGRUENT	TYP_MILD	LISN	sentHUBS	0.224
266	LH	CONGRUENT	TYP_MILD	PROD	sentCORE	0.195
266	LH	CONGRUENT	TYP_MILD	PROD	sentHUBS	0.224
266	LH	CONGRUENT	TYP_MILD	READ	sentCORE	0.375
266	LH	CONGRUENT	TYP_MILD	READ	sentHUBS	0.514
267	RH	CONGRUENT	TYP_STRONG	LISN	sentCORE	0.346
267	RH	CONGRUENT	TYP_STRONG	LISN	sentHUBS	0.489
267	RH	CONGRUENT	TYP_STRONG	PROD	sentCORE	0.847
267	RH	CONGRUENT	TYP_STRONG	PROD	sentHUBS	1.343
267	RH	CONGRUENT	TYP_STRONG	READ	sentCORE	0.137
267	RH	CONGRUENT	TYP_STRONG	READ	sentHUBS	0.243
268	LH	CONGRUENT	TYP_STRONG	LISN	sentCORE	0.022
268	LH	CONGRUENT	TYP_STRONG	LISN	sentHUBS	0.097
268	LH	CONGRUENT	TYP_STRONG	PROD	sentCORE	0.57
268	LH	CONGRUENT	TYP_STRONG	PROD	sentHUBS	0.695
268	LH	CONGRUENT	TYP_STRONG	READ	sentCORE	0.006
268	LH	CONGRUENT	TYP_STRONG	READ	sentHUBS	0.182
269	LH	CONGRUENT	TYP_MILD	LISN	sentCORE	0.225
269	LH	CONGRUENT	TYP_MILD	LISN	sentHUBS	0.074
269	LH	CONGRUENT	TYP_MILD	PROD	sentCORE	0.434
269	LH	CONGRUENT	TYP_MILD	PROD	sentHUBS	0.335
269	LH	CONGRUENT	TYP_MILD	READ	sentCORE	0.242
269	LH	CONGRUENT	TYP_MILD	READ	sentHUBS	0.074
270	RH	CONGRUENT	TYP_STRONG	LISN	sentCORE	0.366
270	RH	CONGRUENT	TYP_STRONG	LISN	sentHUBS	0.526
270	RH	CONGRUENT	TYP_STRONG	PROD	sentCORE	0.551
270	RH	CONGRUENT	TYP_STRONG	PROD	sentHUBS	0.647
270	RH	CONGRUENT	TYP_STRONG	READ	sentCORE	0.253
270	RH	CONGRUENT	TYP_STRONG	READ	sentHUBS	0.465
271	RH	CONGRUENT	TYP_STRONG	LISN	sentCORE	0.225
271	RH	CONGRUENT	TYP_STRONG	LISN	sentHUBS	0.274
271	RH	CONGRUENT	TYP_STRONG	PROD	sentCORE	0.465
271	RH	CONGRUENT	TYP_STRONG	PROD	sentHUBS	0.684
271	RH	CONGRUENT	TYP_STRONG	READ	sentCORE	0.264
271	RH	CONGRUENT	TYP_STRONG	READ	sentHUBS	0.457
272	LH	CONGRUENT	TYP_STRONG	LISN	sentCORE	0.226
272	LH	CONGRUENT	TYP_STRONG	LISN	sentHUBS	0.256
272	LH	CONGRUENT	TYP_STRONG	PROD	sentCORE	0.397
272	LH	CONGRUENT	TYP_STRONG	PROD	sentHUBS	0.723
272	LH	CONGRUENT	TYP_STRONG	READ	sentCORE	0.456
272	LH	CONGRUENT	TYP_STRONG	READ	sentHUBS	0.696
273	RH	CONGRUENT	TYP_MILD	LISN	sentCORE	0.253
273	RH	CONGRUENT	TYP_MILD	LISN	sentHUBS	0.255
273	RH	CONGRUENT	TYP_MILD	PROD	sentCORE	0.287
273	RH	CONGRUENT	TYP_MILD	PROD	sentHUBS	0.323
273	RH	CONGRUENT	TYP_MILD	READ	sentCORE	0.246
273	RH	CONGRUENT	TYP_MILD	READ	sentHUBS	0.179
274	RH	CONGRUENT	TYP_STRONG	LISN	sentCORE	0.363
274	RH	CONGRUENT	TYP_STRONG	LISN	sentHUBS	0.277
274	RH	CONGRUENT	TYP_STRONG	PROD	sentCORE	0.864
274	RH	CONGRUENT	TYP_STRONG	PROD	sentHUBS	0.711
274	RH	CONGRUENT	TYP_STRONG	READ	sentCORE	0.471
274	RH	CONGRUENT	TYP_STRONG	READ	sentHUBS	0.337
275	RH	CONGRUENT	TYP_STRONG	LISN	sentCORE	0.327
275	RH	CONGRUENT	TYP_STRONG	LISN	sentHUBS	0.402
275	RH	CONGRUENT	TYP_STRONG	PROD	sentCORE	0.512
275	RH	CONGRUENT	TYP_STRONG	PROD	sentHUBS	1.055
275	RH	CONGRUENT	TYP_STRONG	READ	sentCORE	0.265
275	RH	CONGRUENT	TYP_STRONG	READ	sentHUBS	0.459
276	LH	CONGRUENT	TYP_MILD	LISN	sentCORE	0.121
276	LH	CONGRUENT	TYP_MILD	LISN	sentHUBS	0.148
276	LH	CONGRUENT	TYP_MILD	PROD	sentCORE	0.402
276	LH	CONGRUENT	TYP_MILD	PROD	sentHUBS	0.535
276	LH	CONGRUENT	TYP_MILD	READ	sentCORE	0.242
276	LH	CONGRUENT	TYP_MILD	READ	sentHUBS	0.092
277	LH	CONGRUENT	TYP_MILD	LISN	sentCORE	0.282
277	LH	CONGRUENT	TYP_MILD	LISN	sentHUBS	0.38
277	LH	CONGRUENT	TYP_MILD	PROD	sentCORE	0.353
277	LH	CONGRUENT	TYP_MILD	PROD	sentHUBS	0.434
277	LH	CONGRUENT	TYP_MILD	READ	sentCORE	0.366
277	LH	CONGRUENT	TYP_MILD	READ	sentHUBS	0.398
278	LH	CONGRUENT	TYP_MILD	LISN	sentCORE	0.118
278	LH	CONGRUENT	TYP_MILD	LISN	sentHUBS	0.123
278	LH	CONGRUENT	TYP_MILD	PROD	sentCORE	0.439
278	LH	CONGRUENT	TYP_MILD	PROD	sentHUBS	0.482
278	LH	CONGRUENT	TYP_MILD	READ	sentCORE	0.361
278	LH	CONGRUENT	TYP_MILD	READ	sentHUBS	0.159
279	RH	CONGRUENT	TYP_STRONG	LISN	sentCORE	0.418
279	RH	CONGRUENT	TYP_STRONG	LISN	sentHUBS	0.159
279	RH	CONGRUENT	TYP_STRONG	PROD	sentCORE	0.481
279	RH	CONGRUENT	TYP_STRONG	PROD	sentHUBS	0.48
279	RH	CONGRUENT	TYP_STRONG	READ	sentCORE	0.484
279	RH	CONGRUENT	TYP_STRONG	READ	sentHUBS	0.137
280	LH	CONGRUENT	TYP_STRONG	LISN	sentCORE	0.305
280	LH	CONGRUENT	TYP_STRONG	LISN	sentHUBS	0.443
280	LH	CONGRUENT	TYP_STRONG	PROD	sentCORE	0.534
280	LH	CONGRUENT	TYP_STRONG	PROD	sentHUBS	0.782
280	LH	CONGRUENT	TYP_STRONG	READ	sentCORE	0.117
280	LH	CONGRUENT	TYP_STRONG	READ	sentHUBS	0.108
281	LH	CONGRUENT	TYP_MILD	LISN	sentCORE	0.355
281	LH	CONGRUENT	TYP_MILD	LISN	sentHUBS	0.372
281	LH	CONGRUENT	TYP_MILD	PROD	sentCORE	0.309
281	LH	CONGRUENT	TYP_MILD	PROD	sentHUBS	0.455
281	LH	CONGRUENT	TYP_MILD	READ	sentCORE	0.243
281	LH	CONGRUENT	TYP_MILD	READ	sentHUBS	0.335
282	RH	CONGRUENT	TYP_MILD	LISN	sentCORE	0.128
282	RH	CONGRUENT	TYP_MILD	LISN	sentHUBS	0.153
282	RH	CONGRUENT	TYP_MILD	PROD	sentCORE	0.257
282	RH	CONGRUENT	TYP_MILD	PROD	sentHUBS	0.297
282	RH	CONGRUENT	TYP_MILD	READ	sentCORE	0.269
282	RH	CONGRUENT	TYP_MILD	READ	sentHUBS	0.443
283	RH	CONGRUENT	TYP_STRONG	LISN	sentCORE	0.323
283	RH	CONGRUENT	TYP_STRONG	LISN	sentHUBS	0.386
283	RH	CONGRUENT	TYP_STRONG	PROD	sentCORE	0.323
283	RH	CONGRUENT	TYP_STRONG	PROD	sentHUBS	0.341
283	RH	CONGRUENT	TYP_STRONG	READ	sentCORE	0.56
283	RH	CONGRUENT	TYP_STRONG	READ	sentHUBS	0.342
284	LH	CONGRUENT	TYP_STRONG	LISN	sentCORE	0.196
284	LH	CONGRUENT	TYP_STRONG	LISN	sentHUBS	0.245
284	LH	CONGRUENT	TYP_STRONG	PROD	sentCORE	0.57
284	LH	CONGRUENT	TYP_STRONG	PROD	sentHUBS	0.938
284	LH	CONGRUENT	TYP_STRONG	READ	sentCORE	0.098
284	LH	CONGRUENT	TYP_STRONG	READ	sentHUBS	0.268
285	RH	CONGRUENT	TYP_STRONG	LISN	sentCORE	0.34
285	RH	CONGRUENT	TYP_STRONG	LISN	sentHUBS	0.544
285	RH	CONGRUENT	TYP_STRONG	PROD	sentCORE	0.581
285	RH	CONGRUENT	TYP_STRONG	PROD	sentHUBS	0.859
285	RH	CONGRUENT	TYP_STRONG	READ	sentCORE	0.258
285	RH	CONGRUENT	TYP_STRONG	READ	sentHUBS	0.366
286	LH	CROSSED	ATYP	LISN	sentCORE	-0.078
286	LH	CROSSED	ATYP	LISN	sentHUBS	-0.314
286	LH	CROSSED	ATYP	PROD	sentCORE	0.224
286	LH	CROSSED	ATYP	PROD	sentHUBS	0.249
286	LH	CROSSED	ATYP	READ	sentCORE	-0.172
286	LH	CROSSED	ATYP	READ	sentHUBS	-0.413
287	RH	CONGRUENT	TYP_MILD	LISN	sentCORE	0.161
287	RH	CONGRUENT	TYP_MILD	LISN	sentHUBS	0.267
287	RH	CONGRUENT	TYP_MILD	PROD	sentCORE	0.289
287	RH	CONGRUENT	TYP_MILD	PROD	sentHUBS	0.271
287	RH	CONGRUENT	TYP_MILD	READ	sentCORE	0.138
287	RH	CONGRUENT	TYP_MILD	READ	sentHUBS	0.084
