# Supplementary material for: Typical and atypical language brain organization based on intrinsic connectivity and multitask functional asymmetries
Source: eLife journal article supplement (doi:10.7554/elife.58722), 2020-10-16
Supplement: supp [file elife-58722-supp-v1.zip › elife_poa_e58722_Figure_2_source_data_1.txt]

ID	Classif_MMHC	Rs_DC_LeftHemisphere	Rs_DC_RightHemisphere
1	TYP_MILD	4.128	3.899
2	TYP_MILD	4.632	3.944
3	TYP_STRONG	6.135	4.983
4	TYP_MILD	2.880	3.101
5	TYP_MILD	4.752	4.129
6	TYP_STRONG	3.546	4.023
7	TYP_MILD	4.512	3.811
8	TYP_MILD	4.204	3.464
9	TYP_MILD	5.230	4.025
10	TYP_MILD	4.815	3.241
11	TYP_STRONG	3.657	4.050
12	TYP_STRONG	5.955	4.651
13	ATYP	5.452	6.636
14	TYP_MILD	3.866	2.880
15	TYP_STRONG	4.153	3.354
16	TYP_MILD	4.613	3.405
17	TYP_STRONG	5.019	5.021
18	TYP_STRONG	5.832	3.773
19	TYP_MILD	4.446	3.658
20	TYP_MILD	2.856	3.325
21	TYP_MILD	4.620	3.659
22	TYP_STRONG	2.864	3.145
23	TYP_MILD	4.447	3.462
24	TYP_MILD	3.802	3.137
25	TYP_STRONG	4.258	4.737
26	TYP_STRONG	5.824	4.433
27	TYP_MILD	5.417	4.273
28	TYP_MILD	3.815	3.099
29	TYP_MILD	4.718	4.133
30	TYP_MILD	4.304	3.792
31	TYP_MILD	4.791	3.390
32	TYP_MILD	3.199	3.170
33	TYP_MILD	3.387	3.143
34	TYP_STRONG	5.984	5.374
35	TYP_STRONG	5.356	4.039
36	TYP_STRONG	4.539	4.757
37	TYP_STRONG	3.428	3.386
38	ATYP	6.683	6.378
39	ATYP	5.053	4.131
40	TYP_MILD	4.050	3.834
41	TYP_STRONG	5.561	4.209
42	TYP_MILD	5.053	4.029
43	TYP_MILD	4.474	3.300
44	ATYP	4.798	4.941
45	TYP_MILD	3.867	3.574
46	TYP_STRONG	4.369	2.881
47	TYP_STRONG	6.246	6.082
48	TYP_MILD	3.576	3.726
49	TYP_MILD	3.680	3.287
50	TYP_MILD	3.311	3.606
51	TYP_STRONG	3.721	3.932
52	TYP_STRONG	4.523	3.573
53	TYP_MILD	4.127	4.248
54	TYP_MILD	4.333	3.962
55	TYP_MILD	3.916	3.459
56	TYP_STRONG	3.901	5.681
57	TYP_STRONG	4.236	3.285
58	TYP_STRONG	3.923	3.465
59	ATYP	4.566	4.492
60	TYP_MILD	4.527	3.899
61	ATYP	4.733	5.538
62	TYP_STRONG	5.576	5.003
63	TYP_STRONG	4.400	4.378
64	ATYP	4.812	4.672
65	TYP_STRONG	7.283	4.951
66	ATYP	4.940	4.707
67	TYP_MILD	4.050	3.781
68	TYP_STRONG	3.467	2.917
69	TYP_MILD	4.534	4.687
70	TYP_MILD	4.689	3.827
71	TYP_MILD	3.681	3.357
72	TYP_STRONG	3.904	3.057
73	TYP_MILD	2.878	2.707
74	TYP_STRONG	4.084	4.248
75	TYP_MILD	5.098	4.312
76	TYP_STRONG	5.575	4.316
77	TYP_MILD	4.160	3.894
78	TYP_MILD	3.702	3.597
79	TYP_STRONG	5.874	4.998
80	TYP_MILD	4.737	4.023
81	TYP_STRONG	4.193	4.526
82	TYP_STRONG	5.362	4.547
83	TYP_STRONG	4.223	3.661
84	TYP_MILD	4.840	4.925
85	TYP_MILD	3.529	3.663
86	TYP_MILD	5.847	5.140
87	ATYP	4.883	4.636
88	TYP_STRONG	4.298	3.541
89	ATYP	4.009	4.731
90	TYP_STRONG	4.443	4.576
91	TYP_MILD	2.913	3.051
92	TYP_STRONG	5.574	6.121
93	ATYP	3.829	4.716
94	ATYP	3.908	4.164
95	TYP_STRONG	3.662	3.677
96	TYP_MILD	5.741	3.886
97	TYP_MILD	4.232	3.970
98	TYP_MILD	5.087	3.724
99	TYP_MILD	6.175	4.608
100	TYP_STRONG	5.404	4.369
101	TYP_MILD	4.805	3.595
102	TYP_MILD	3.375	4.584
103	TYP_STRONG	4.082	3.659
104	TYP_STRONG	4.257	3.823
105	TYP_STRONG	3.480	3.483
106	TYP_MILD	3.666	4.229
107	TYP_MILD	6.285	4.198
108	TYP_MILD	4.239	3.155
109	TYP_STRONG	4.145	3.851
110	TYP_MILD	4.213	3.786
111	ATYP	2.986	3.722
112	TYP_MILD	3.015	3.446
113	TYP_MILD	3.718	2.742
114	TYP_MILD	3.229	3.283
115	TYP_STRONG	4.167	2.859
116	TYP_STRONG	4.093	3.224
117	ATYP	3.053	2.541
118	TYP_MILD	4.250	4.066
119	TYP_STRONG	5.175	3.556
120	ATYP	5.417	5.062
121	TYP_STRONG	4.992	4.752
122	TYP_STRONG	5.983	4.780
123	TYP_MILD	4.694	3.912
124	TYP_MILD	5.721	4.576
125	TYP_STRONG	4.704	3.786
126	TYP_STRONG	5.997	4.060
127	TYP_STRONG	4.058	4.560
128	TYP_STRONG	5.162	2.928
129	ATYP	4.829	4.548
130	TYP_STRONG	3.491	3.185
131	TYP_MILD	3.317	3.257
132	TYP_STRONG	4.905	5.215
133	TYP_MILD	3.816	3.116
134	TYP_STRONG	3.800	4.296
135	TYP_MILD	3.755	4.487
136	TYP_STRONG	4.607	4.670
137	TYP_STRONG	4.538	3.672
138	TYP_MILD	3.285	3.364
139	TYP_MILD	3.574	3.700
140	ATYP	4.468	4.014
141	TYP_MILD	4.562	4.063
142	TYP_MILD	5.315	3.993
143	TYP_MILD	4.146	3.491
144	ATYP	6.728	5.937
145	TYP_MILD	3.383	3.993
146	ATYP	4.410	5.322
147	TYP_STRONG	4.763	3.008
148	TYP_MILD	4.232	3.863
149	TYP_STRONG	4.029	3.489
150	TYP_STRONG	4.323	4.569
151	TYP_MILD	5.334	4.725
152	TYP_MILD	2.452	3.433
153	TYP_STRONG	4.477	3.436
154	TYP_STRONG	5.029	4.278
155	TYP_MILD	4.126	3.423
156	TYP_MILD	3.504	2.999
157	TYP_STRONG	4.836	4.968
158	TYP_MILD	3.660	2.923
159	ATYP	4.481	5.583
160	TYP_MILD	4.433	3.538
161	TYP_STRONG	3.627	3.802
162	TYP_MILD	4.329	3.531
163	TYP_MILD	4.299	4.268
164	TYP_STRONG	4.780	5.289
165	ATYP	3.629	4.931
166	TYP_STRONG	3.732	3.818
167	TYP_STRONG	4.123	3.613
168	TYP_MILD	5.207	5.001
169	TYP_MILD	4.110	3.144
170	TYP_MILD	3.534	3.827
171	TYP_MILD	3.793	3.501
172	ATYP	3.820	4.814
173	TYP_MILD	4.863	3.977
174	TYP_MILD	4.185	4.774
175	TYP_STRONG	4.597	3.663
176	TYP_STRONG	3.796	4.370
177	TYP_MILD	3.291	3.940
178	TYP_STRONG	3.434	4.159
179	TYP_STRONG	5.719	4.435
180	TYP_STRONG	3.848	4.868
181	TYP_STRONG	5.155	3.862
182	TYP_STRONG	3.370	4.310
183	TYP_MILD	2.900	2.689
184	ATYP	4.868	3.940
185	TYP_MILD	2.793	3.340
186	ATYP	4.417	3.498
187	TYP_STRONG	3.034	2.854
188	TYP_STRONG	6.000	4.721
189	TYP_MILD	5.236	4.984
190	TYP_MILD	4.970	5.313
191	TYP_MILD	5.881	4.487
192	TYP_MILD	3.340	3.199
193	TYP_STRONG	6.029	4.381
194	TYP_MILD	4.296	3.616
195	TYP_MILD	5.370	4.832
196	TYP_MILD	3.864	3.879
197	TYP_STRONG	6.252	5.095
198	TYP_MILD	5.097	4.616
199	TYP_MILD	4.409	4.174
200	TYP_STRONG	4.870	3.557
201	TYP_MILD	3.075	2.794
202	TYP_STRONG	3.317	4.053
203	TYP_MILD	3.466	3.236
204	TYP_MILD	3.423	2.481
205	TYP_STRONG	3.304	3.174
206	TYP_STRONG	5.129	4.775
207	TYP_STRONG	5.633	4.813
208	TYP_STRONG	4.438	5.032
209	TYP_MILD	3.982	3.599
210	TYP_MILD	4.233	3.846
211	TYP_STRONG	4.841	5.001
212	TYP_STRONG	4.264	3.546
213	TYP_MILD	3.685	4.109
214	ATYP	5.490	5.089
215	TYP_STRONG	3.899	4.506
216	TYP_STRONG	4.387	4.263
217	TYP_STRONG	4.407	3.882
218	ATYP	4.112	5.771
219	TYP_MILD	4.446	3.382
220	TYP_STRONG	4.489	4.684
221	TYP_STRONG	4.087	3.412
222	TYP_STRONG	3.971	2.985
223	TYP_MILD	3.446	3.242
224	TYP_MILD	4.403	3.511
225	TYP_STRONG	4.029	3.804
226	TYP_MILD	4.337	4.830
227	TYP_MILD	3.470	3.341
228	TYP_MILD	3.983	3.034
229	TYP_STRONG	4.727	3.639
230	TYP_STRONG	4.048	3.502
231	TYP_STRONG	2.913	2.431
232	TYP_STRONG	4.254	4.221
233	TYP_STRONG	4.481	4.241
234	TYP_MILD	5.084	4.281
235	TYP_STRONG	4.343	3.476
236	TYP_STRONG	4.007	5.055
237	TYP_MILD	4.208	4.445
238	TYP_STRONG	4.584	5.025
239	TYP_STRONG	4.847	3.291
240	TYP_MILD	2.734	2.964
241	TYP_STRONG	3.492	2.581
242	TYP_MILD	4.863	4.278
243	TYP_MILD	5.317	3.167
244	TYP_MILD	2.882	3.036
245	TYP_STRONG	4.178	4.002
246	TYP_MILD	4.009	3.842
247	TYP_STRONG	3.702	3.347
248	TYP_STRONG	4.746	3.515
249	TYP_MILD	3.471	3.031
250	TYP_STRONG	3.716	4.289
251	TYP_MILD	6.185	4.509
252	TYP_STRONG	4.896	4.056
253	TYP_STRONG	5.043	3.939
254	TYP_STRONG	3.626	3.460
255	TYP_MILD	3.536	3.212
256	TYP_STRONG	5.795	4.152
257	TYP_MILD	3.646	3.548
258	ATYP	3.535	3.945
259	TYP_MILD	4.321	3.502
260	TYP_MILD	4.738	3.281
261	ATYP	6.478	5.315
262	TYP_STRONG	4.837	3.879
263	TYP_STRONG	4.612	3.723
264	ATYP	4.437	4.986
265	TYP_STRONG	5.274	4.554
266	TYP_MILD	5.268	3.692
267	TYP_STRONG	5.708	4.031
268	TYP_STRONG	5.065	3.219
269	TYP_MILD	3.606	4.398
270	TYP_STRONG	5.049	4.727
271	TYP_STRONG	4.126	3.301
272	TYP_STRONG	3.916	3.410
273	TYP_MILD	5.446	4.195
274	TYP_STRONG	3.817	3.889
275	TYP_STRONG	6.621	6.547
276	TYP_MILD	4.845	3.148
277	TYP_MILD	3.613	2.960
278	TYP_MILD	4.048	3.596
279	TYP_STRONG	5.870	4.055
280	TYP_STRONG	4.960	4.111
281	TYP_MILD	4.152	3.933
282	TYP_MILD	5.347	4.096
283	TYP_STRONG	4.076	4.088
284	TYP_STRONG	6.039	4.593
285	TYP_STRONG	3.779	3.803
286	ATYP	4.571	5.653
287	TYP_MILD	4.679	3.399
