# Supplementary material for: Typical and atypical language brain organization based on intrinsic connectivity and multitask functional asymmetries
Source: eLife journal article supplement (doi:10.7554/elife.58722), 2020-10-16
Supplement: supp [file elife-58722-supp-v1.zip › elife_poa_e58722_Figure_2_source_data_2.txt]

Variable_Name,Informations
ID,Participants identifier.
Classif_MMHC,"Multitask Multimodal Hierarchical Classification (MMHC) classification used in the paper. Hierarchical classification based both on language task-induced asymmetries and on resting-state organization within the SENT_CORE network (described in Labache et al. 2019). The agglomerative hierarchical procedure resulted in the identification of 3 clusters. We will refer to these clusters as groups varying in their «language organization»: TYP_STRONG, TYP_MILD and ATYP."
Rs_DC_LeftHemisphere,Resting-state Degree Centrality (Rs_DC) of the left hemisphere for SENT_CORE network.
Rs_DC_RightHemisphere,Resting-state Degree Centrality (Rs_DC) of the right hemisphere for SENT_CORE network.
