# Supplementary material for: Typical and atypical language brain organization based on intrinsic connectivity and multitask functional asymmetries
Source: eLife journal article supplement (doi:10.7554/elife.58722), 2020-10-16
Supplement: supp [file elife-58722-supp-v1.zip › elife_poa_e58722_Figure_3_source_data_1.txt]

ID	Classif_MMHC	Task	Level	BOLD_Asym
13	ATYP	LISN	sentCORE	-0.002
13	ATYP	LISN	sentHUBS	0.116
13	ATYP	PROD	sentCORE	0.149
13	ATYP	PROD	sentHUBS	0.234
13	ATYP	READ	sentCORE	-0.106
13	ATYP	READ	sentHUBS	-0.071
28	TYP_MILD	LISN	sentCORE	0.053
28	TYP_MILD	LISN	sentHUBS	0.058
28	TYP_MILD	PROD	sentCORE	0.584
28	TYP_MILD	PROD	sentHUBS	0.613
28	TYP_MILD	READ	sentCORE	-0.066
28	TYP_MILD	READ	sentHUBS	-0.025
38	ATYP	LISN	sentCORE	-0.328
38	ATYP	LISN	sentHUBS	-0.513
38	ATYP	PROD	sentCORE	0.014
38	ATYP	PROD	sentHUBS	0.169
38	ATYP	READ	sentCORE	-0.41
38	ATYP	READ	sentHUBS	-0.812
39	ATYP	LISN	sentCORE	-0.328
39	ATYP	LISN	sentHUBS	-0.645
39	ATYP	PROD	sentCORE	0.245
39	ATYP	PROD	sentHUBS	0.209
39	ATYP	READ	sentCORE	-0.08
39	ATYP	READ	sentHUBS	-0.273
40	TYP_MILD	LISN	sentCORE	0.057
40	TYP_MILD	LISN	sentHUBS	0.023
40	TYP_MILD	PROD	sentCORE	0.193
40	TYP_MILD	PROD	sentHUBS	0.332
40	TYP_MILD	READ	sentCORE	0.099
40	TYP_MILD	READ	sentHUBS	-0.075
46	TYP_STRONG	LISN	sentCORE	-0.053
46	TYP_STRONG	LISN	sentHUBS	0.107
46	TYP_STRONG	PROD	sentCORE	0.363
46	TYP_STRONG	PROD	sentHUBS	0.582
46	TYP_STRONG	READ	sentCORE	0.13
46	TYP_STRONG	READ	sentHUBS	0.35
49	TYP_MILD	LISN	sentCORE	0.207
49	TYP_MILD	LISN	sentHUBS	-0.054
49	TYP_MILD	PROD	sentCORE	0.438
49	TYP_MILD	PROD	sentHUBS	0.328
49	TYP_MILD	READ	sentCORE	0.165
49	TYP_MILD	READ	sentHUBS	-0.091
61	ATYP	LISN	sentCORE	-0.247
61	ATYP	LISN	sentHUBS	-0.483
61	ATYP	PROD	sentCORE	0.062
61	ATYP	PROD	sentHUBS	0.391
61	ATYP	READ	sentCORE	-0.058
61	ATYP	READ	sentHUBS	-0.283
66	ATYP	LISN	sentCORE	-0.065
66	ATYP	LISN	sentHUBS	-0.301
66	ATYP	PROD	sentCORE	0.06
66	ATYP	PROD	sentHUBS	0.099
66	ATYP	READ	sentCORE	0.02
66	ATYP	READ	sentHUBS	-0.232
78	TYP_MILD	LISN	sentCORE	-0.013
78	TYP_MILD	LISN	sentHUBS	0.124
78	TYP_MILD	PROD	sentCORE	0.083
78	TYP_MILD	PROD	sentHUBS	0.543
78	TYP_MILD	READ	sentCORE	-0.1
78	TYP_MILD	READ	sentHUBS	-0.048
93	ATYP	LISN	sentCORE	0.028
93	ATYP	LISN	sentHUBS	0.14
93	ATYP	PROD	sentCORE	-0.179
93	ATYP	PROD	sentHUBS	0.13
93	ATYP	READ	sentCORE	-0.032
93	ATYP	READ	sentHUBS	0.136
111	ATYP	LISN	sentCORE	0.081
111	ATYP	LISN	sentHUBS	0.145
111	ATYP	PROD	sentCORE	-0.078
111	ATYP	PROD	sentHUBS	-0.199
111	ATYP	READ	sentCORE	-0.099
111	ATYP	READ	sentHUBS	-0.182
129	ATYP	LISN	sentCORE	-0.297
129	ATYP	LISN	sentHUBS	-0.956
129	ATYP	PROD	sentCORE	0.138
129	ATYP	PROD	sentHUBS	0.234
129	ATYP	READ	sentCORE	-0.247
129	ATYP	READ	sentHUBS	-0.733
144	ATYP	LISN	sentCORE	0.095
144	ATYP	LISN	sentHUBS	-0.06
144	ATYP	PROD	sentCORE	-0.209
144	ATYP	PROD	sentHUBS	-0.274
144	ATYP	READ	sentCORE	0.173
144	ATYP	READ	sentHUBS	0.053
171	TYP_MILD	LISN	sentCORE	0.106
171	TYP_MILD	LISN	sentHUBS	0.159
171	TYP_MILD	PROD	sentCORE	0.139
171	TYP_MILD	PROD	sentHUBS	0.168
171	TYP_MILD	READ	sentCORE	-0.057
171	TYP_MILD	READ	sentHUBS	-0.039
176	TYP_STRONG	LISN	sentCORE	-0.03
176	TYP_STRONG	LISN	sentHUBS	-0.069
176	TYP_STRONG	PROD	sentCORE	0.84
176	TYP_STRONG	PROD	sentHUBS	0.9
176	TYP_STRONG	READ	sentCORE	0.292
176	TYP_STRONG	READ	sentHUBS	0.222
184	ATYP	LISN	sentCORE	-0.155
184	ATYP	LISN	sentHUBS	-0.34
184	ATYP	PROD	sentCORE	0.106
184	ATYP	PROD	sentHUBS	0.203
184	ATYP	READ	sentCORE	-0.066
184	ATYP	READ	sentHUBS	-0.053
189	TYP_MILD	LISN	sentCORE	0.07
189	TYP_MILD	LISN	sentHUBS	-0.056
189	TYP_MILD	PROD	sentCORE	0.154
189	TYP_MILD	PROD	sentHUBS	0.088
189	TYP_MILD	READ	sentCORE	0.299
189	TYP_MILD	READ	sentHUBS	0.272
214	ATYP	LISN	sentCORE	0.002
214	ATYP	LISN	sentHUBS	-0.249
214	ATYP	PROD	sentCORE	0.13
214	ATYP	PROD	sentHUBS	0.054
214	ATYP	READ	sentCORE	-0.006
214	ATYP	READ	sentHUBS	-0.311
224	TYP_MILD	LISN	sentCORE	0.18
224	TYP_MILD	LISN	sentHUBS	0.012
224	TYP_MILD	PROD	sentCORE	0.254
224	TYP_MILD	PROD	sentHUBS	0.43
224	TYP_MILD	READ	sentCORE	0.087
224	TYP_MILD	READ	sentHUBS	-0.438
234	TYP_MILD	LISN	sentCORE	0.186
234	TYP_MILD	LISN	sentHUBS	0.112
234	TYP_MILD	PROD	sentCORE	0.005
234	TYP_MILD	PROD	sentHUBS	-0.081
234	TYP_MILD	READ	sentCORE	0.036
234	TYP_MILD	READ	sentHUBS	-0.07
242	TYP_MILD	LISN	sentCORE	0.059
242	TYP_MILD	LISN	sentHUBS	-0.054
242	TYP_MILD	PROD	sentCORE	0.43
242	TYP_MILD	PROD	sentHUBS	0.415
242	TYP_MILD	READ	sentCORE	0.082
242	TYP_MILD	READ	sentHUBS	-0.091
286	ATYP	LISN	sentCORE	-0.078
286	ATYP	LISN	sentHUBS	-0.314
286	ATYP	PROD	sentCORE	0.224
286	ATYP	PROD	sentHUBS	0.249
286	ATYP	READ	sentCORE	-0.172
286	ATYP	READ	sentHUBS	-0.413
