# Supplementary material for: Typical and atypical language brain organization based on intrinsic connectivity and multitask functional asymmetries
Source: eLife journal article supplement (doi:10.7554/elife.58722), 2020-10-16
Supplement: supp [file elife-58722-supp-v1.zip › elife_poa_e58722_Figure_3_source_data_2.txt]

Variable_Name,Informations,Unit
ID,"Participants identifier. Here, the 23 particpants identified as crossed: i.e. individuals exhibited dissociation in their asymmetries induced by the 3 language tasks.",
Classif_MMHC,"Multitask Multimodal Hierarchical Classification (MMHC) classification used in the paper. Hierarchical classification based both on language task-induced asymmetries and on resting-state organization within the SENT_CORE network (described in Labache et al. 2019). The agglomerative hierarchical procedure resulted in the identification of 3 clusters. We will refer to these clusters as groups varying in their «language organization»: TYP_STRONG, TYP_MILD and ATYP.",
Task,"Referes to the 3 possible tasks performed by the participant : ""PROD"" for the production (sentence minus word-list) task, ""LISN"" for the listening (sentence minus word-list) task and ""READ"" for the reading (sentence minus word-list) task.",
Level,"Level at which the BOLD signal is calculated: ""sentCORE"" for all 18 hROIs composing the sentence core network, « sentHubs » for the 3 hubs of the sentence core network.",
BOLD_Asym,Asymmetry (right minus left hemisphere) of the BOLD signal variations.,
