# Supplementary material for: Typical and atypical language brain organization based on intrinsic connectivity and multitask functional asymmetries
Source: eLife journal article supplement (doi:10.7554/elife.58722), 2020-10-16
Supplement: supp [file elife-58722-supp-v1.zip › elife_poa_e58722_Figure_4_source_data_1.txt]

Classif_MMHC_2categories	DISSOCIATIONS_2categories	estimated_zTransform_Rs_mIHHC	upperBound_95percent_confidence_intervals	lowerBound_95percent_confidence_intervals	95percent_confidence_intervals
TYP	CONGRUENT	0.67001648	0.65717677	0.68285620	0.012839717
TYP	CROSSED	0.62769676	0.56697747	0.68841605	0.060719287
ATYP	CONGRUENT	0.68697853	0.63951208	0.73444498	0.0474664501
ATYP	CROSSED	0.76032386	0.70218957	0.81845815	0.0581342913
