# Supplementary material for: Typical and atypical language brain organization based on intrinsic connectivity and multitask functional asymmetries
Source: eLife journal article supplement (doi:10.7554/elife.58722), 2020-10-16
Supplement: supp [file elife-58722-supp-v1.zip › elife_poa_e58722_Figure_4_source_data_2.txt]

Variable_Name,Informations
Classif_MMHC_2categories,ATYP and TYP categories obtained by MMHC. TYP results in merging TYP_MILD and TYP_STRONG categories.
DISSOCIATIONS_2categories,"Participants exhibiting a dissociation for either SENT_CORE or SENT_HUB or both, were named “CROSSED”. Those showing either leftward lateralization for all tasks for both SENT_ CORE and SENT_HUBS or right lateralization for all tasks for both SENT_CORE and SENT_HUBS, were named “CONGRUENT”."
estimated_zTransform_Rs_mIHHC,Least square mean of the Fisher z-transformation (zTransform) of the mean Resting-state InterHemispheric Homotopic Pearson Correlation coefficient (Rs_mIHHC) of SENT_CORE network.
upperBound_95percent_confidence_intervals,Upper bound of the 95% confidence interval of the least square mean Rs_mIHHC
lowerBound_95percent_confidence_intervals,Lower bound of the 95% confidence interval of the least square mean Rs_mIHHC
95percent_confidence_intervals,95% confidence interval of the least square mean Rs_mIHHC
