# Supplementary material for: Typical and atypical language brain organization based on intrinsic connectivity and multitask functional asymmetries
Source: eLife journal article supplement (doi:10.7554/elife.58722), 2020-10-16
Supplement: supp [file elife-58722-supp-v1.zip › elife_poa_e58722_Figure_5_source_data_1.txt]

Classif_MMHC	mainPrincipalComponents_cognitiveAbilities	estimated_loadings	lowerBound_95percent_confidence_intervals	upperBound_95percent_confidence_intervals	95percent_confidence_intervals
TYP_STRONG	CP1 res VS	0.2940383	0.070848	0.5172281	0.4463797635
TYP_STRONG	CP2 res mem verb	-0.0508020	-0.273992	0.1723879	0.4463797635
TYP_STRONG	CP3 res phono	-0.0394206	-0.262610	0.1837693	0.4463797635
TYP_STRONG	CP4 res verbal	-0.0563126	-0.279502	0.1668773	0.4463797635
TYP_MILD	CP1 res VS	-0.1901539	-0.408132	0.0278246	0.4359570088
TYP_MILD	CP2 res mem verb	0.1937677	-0.024211	0.4117462	0.4359570088
TYP_MILD	CP3 res phono	-0.0041548	-0.222133	0.2138237	0.4359570088
TYP_MILD	CP4 res verbal	-0.0053362	-0.223315	0.2126423	0.4359570088
ATYP	CP1 res VS	-0.4119245	-0.865683	0.0418340	0.9075168825
ATYP	CP2 res mem verb	-0.5742430	-1.028001	-0.1204846	0.9075168825
ATYP	CP3 res phono	0.3490139	-0.104745	0.8027723	0.9075168825
ATYP	CP4 res verbal	0.2907066	-0.163052	0.7444651	0.9075168825
