# Supplementary material for: Typical and atypical language brain organization based on intrinsic connectivity and multitask functional asymmetries
Source: eLife journal article supplement (doi:10.7554/elife.58722), 2020-10-16
Supplement: supp [file elife-58722-supp-v1.zip › elife_poa_e58722_Figure_5_source_data_2.txt]

Variable_Name,Informations
Classif_MMHC,"Multitask Multimodal Hierarchical Classification (MMHC) classification used in the paper. Hierarchical classification based both on language task-induced asymmetries and on resting-state organization within the SENT_CORE network (described in Labache et al. 2019). The agglomerative hierarchical procedure resulted in the identification of 3 clusters. We will refer to these clusters as groups varying in their «language organization»: TYP_STRONG, TYP_MILD and ATYP."
mainPrincipalComponents_cognitiveAbilities,Qualitative variable indicating the principal component of cognitive ability considered.
estimated_loadings,Least square mean of the principal component of cognitive ability.
lowerBound_95percent_confidence_intervals,Upper bound of the 95% confidence interval of the least square mean principal component
upperBound_95percent_confidence_intervals,Lower bound of the 95% confidence interval of the least square mean principal component
95percent_confidence_intervals,95% confidence interval of the least square mean principal component
