# Supplementary material for: Typical and atypical language brain organization based on intrinsic connectivity and multitask functional asymmetries
Source: eLife journal article supplement (doi:10.7554/elife.58722), 2020-10-16
Supplement: supp [file elife-58722-supp-v1.zip › elife_poa_e58722_Figure_6_source_data_1.txt]

ID	MP	Variable	Group	Classif_MMHC
1	D	Class_HFLI_PROD_Mazoyer2014	Typical	TYP_MILD
1	D	Classif_MMHC	TYP_MILD	TYP_MILD
1	D	Group_SVM_LeftHemisphere_Zago2017	Dominant	TYP_MILD
1	D	Group_SVM_RightHemisphere_Zago2017	Non-dominant	TYP_MILD
2	G	Class_HFLI_PROD_Mazoyer2014	Typical	TYP_MILD
2	G	Classif_MMHC	TYP_MILD	TYP_MILD
2	G	Group_SVM_LeftHemisphere_Zago2017	Dominant	TYP_MILD
2	G	Group_SVM_RightHemisphere_Zago2017	Dominant	TYP_MILD
3	D	Class_HFLI_PROD_Mazoyer2014	Ambilateral	TYP_STRONG
3	D	Classif_MMHC	TYP_STRONG	TYP_STRONG
3	D	Group_SVM_LeftHemisphere_Zago2017	Dominant	TYP_STRONG
3	D	Group_SVM_RightHemisphere_Zago2017	Non-dominant	TYP_STRONG
4	G	Class_HFLI_PROD_Mazoyer2014	Typical	TYP_MILD
4	G	Classif_MMHC	TYP_MILD	TYP_MILD
4	G	Group_SVM_LeftHemisphere_Zago2017	Dominant	TYP_MILD
4	G	Group_SVM_RightHemisphere_Zago2017	Non-dominant	TYP_MILD
5	D	Class_HFLI_PROD_Mazoyer2014	Typical	TYP_MILD
5	D	Classif_MMHC	TYP_MILD	TYP_MILD
5	D	Group_SVM_LeftHemisphere_Zago2017	Dominant	TYP_MILD
5	D	Group_SVM_RightHemisphere_Zago2017	Non-dominant	TYP_MILD
6	D	Class_HFLI_PROD_Mazoyer2014	Typical	TYP_STRONG
6	D	Classif_MMHC	TYP_STRONG	TYP_STRONG
6	D	Group_SVM_LeftHemisphere_Zago2017	Dominant	TYP_STRONG
6	D	Group_SVM_RightHemisphere_Zago2017	Non-dominant	TYP_STRONG
7	G	Class_HFLI_PROD_Mazoyer2014	Ambilateral	TYP_MILD
7	G	Classif_MMHC	TYP_MILD	TYP_MILD
7	G	Group_SVM_LeftHemisphere_Zago2017	Dominant	TYP_MILD
7	G	Group_SVM_RightHemisphere_Zago2017	Non-dominant	TYP_MILD
8	D	Class_HFLI_PROD_Mazoyer2014	Typical	TYP_MILD
8	D	Classif_MMHC	TYP_MILD	TYP_MILD
8	D	Group_SVM_LeftHemisphere_Zago2017	Dominant	TYP_MILD
8	D	Group_SVM_RightHemisphere_Zago2017	Non-dominant	TYP_MILD
9	D	Class_HFLI_PROD_Mazoyer2014	Typical	TYP_MILD
9	D	Classif_MMHC	TYP_MILD	TYP_MILD
9	D	Group_SVM_LeftHemisphere_Zago2017	Dominant	TYP_MILD
9	D	Group_SVM_RightHemisphere_Zago2017	Non-dominant	TYP_MILD
10	D	Class_HFLI_PROD_Mazoyer2014	Ambilateral	TYP_MILD
10	D	Classif_MMHC	TYP_MILD	TYP_MILD
10	D	Group_SVM_LeftHemisphere_Zago2017	Dominant	TYP_MILD
10	D	Group_SVM_RightHemisphere_Zago2017	Non-dominant	TYP_MILD
11	D	Class_HFLI_PROD_Mazoyer2014	Typical	TYP_STRONG
11	D	Classif_MMHC	TYP_STRONG	TYP_STRONG
11	D	Group_SVM_LeftHemisphere_Zago2017	Dominant	TYP_STRONG
11	D	Group_SVM_RightHemisphere_Zago2017	Non-dominant	TYP_STRONG
12	D	Class_HFLI_PROD_Mazoyer2014	Typical	TYP_STRONG
12	D	Classif_MMHC	TYP_STRONG	TYP_STRONG
12	D	Group_SVM_LeftHemisphere_Zago2017	Dominant	TYP_STRONG
12	D	Group_SVM_RightHemisphere_Zago2017	Non-dominant	TYP_STRONG
13	D	Class_HFLI_PROD_Mazoyer2014	Ambilateral	ATYP
13	D	Classif_MMHC	ATYP	ATYP
13	D	Group_SVM_LeftHemisphere_Zago2017	Dominant	ATYP
13	D	Group_SVM_RightHemisphere_Zago2017	Non-dominant	ATYP
14	D	Class_HFLI_PROD_Mazoyer2014	Ambilateral	TYP_MILD
14	D	Classif_MMHC	TYP_MILD	TYP_MILD
14	D	Group_SVM_LeftHemisphere_Zago2017	Dominant	TYP_MILD
14	D	Group_SVM_RightHemisphere_Zago2017	Non-dominant	TYP_MILD
15	D	Class_HFLI_PROD_Mazoyer2014	Typical	TYP_STRONG
15	D	Classif_MMHC	TYP_STRONG	TYP_STRONG
15	D	Group_SVM_LeftHemisphere_Zago2017	Dominant	TYP_STRONG
15	D	Group_SVM_RightHemisphere_Zago2017	Non-dominant	TYP_STRONG
16	D	Class_HFLI_PROD_Mazoyer2014	Ambilateral	TYP_MILD
16	D	Classif_MMHC	TYP_MILD	TYP_MILD
16	D	Group_SVM_LeftHemisphere_Zago2017	Dominant	TYP_MILD
16	D	Group_SVM_RightHemisphere_Zago2017	Non-dominant	TYP_MILD
17	D	Class_HFLI_PROD_Mazoyer2014	Typical	TYP_STRONG
17	D	Classif_MMHC	TYP_STRONG	TYP_STRONG
17	D	Group_SVM_LeftHemisphere_Zago2017	Dominant	TYP_STRONG
17	D	Group_SVM_RightHemisphere_Zago2017	Non-dominant	TYP_STRONG
18	D	Class_HFLI_PROD_Mazoyer2014	Typical	TYP_STRONG
18	D	Classif_MMHC	TYP_STRONG	TYP_STRONG
18	D	Group_SVM_LeftHemisphere_Zago2017	Dominant	TYP_STRONG
18	D	Group_SVM_RightHemisphere_Zago2017	Non-dominant	TYP_STRONG
19	D	Class_HFLI_PROD_Mazoyer2014	Typical	TYP_MILD
19	D	Classif_MMHC	TYP_MILD	TYP_MILD
19	D	Group_SVM_LeftHemisphere_Zago2017	Dominant	TYP_MILD
19	D	Group_SVM_RightHemisphere_Zago2017	Non-dominant	TYP_MILD
20	D	Class_HFLI_PROD_Mazoyer2014	Typical	TYP_MILD
20	D	Classif_MMHC	TYP_MILD	TYP_MILD
20	D	Group_SVM_LeftHemisphere_Zago2017	Dominant	TYP_MILD
20	D	Group_SVM_RightHemisphere_Zago2017	Non-dominant	TYP_MILD
21	D	Class_HFLI_PROD_Mazoyer2014	Typical	TYP_MILD
21	D	Classif_MMHC	TYP_MILD	TYP_MILD
21	D	Group_SVM_LeftHemisphere_Zago2017	Dominant	TYP_MILD
21	D	Group_SVM_RightHemisphere_Zago2017	Non-dominant	TYP_MILD
22	D	Class_HFLI_PROD_Mazoyer2014	Typical	TYP_STRONG
22	D	Classif_MMHC	TYP_STRONG	TYP_STRONG
22	D	Group_SVM_LeftHemisphere_Zago2017	Dominant	TYP_STRONG
22	D	Group_SVM_RightHemisphere_Zago2017	Non-dominant	TYP_STRONG
23	D	Class_HFLI_PROD_Mazoyer2014	Typical	TYP_MILD
23	D	Classif_MMHC	TYP_MILD	TYP_MILD
23	D	Group_SVM_LeftHemisphere_Zago2017	Dominant	TYP_MILD
23	D	Group_SVM_RightHemisphere_Zago2017	Non-dominant	TYP_MILD
24	D	Class_HFLI_PROD_Mazoyer2014	Typical	TYP_MILD
24	D	Classif_MMHC	TYP_MILD	TYP_MILD
24	D	Group_SVM_LeftHemisphere_Zago2017	Dominant	TYP_MILD
24	D	Group_SVM_RightHemisphere_Zago2017	Non-dominant	TYP_MILD
25	D	Class_HFLI_PROD_Mazoyer2014	Typical	TYP_STRONG
25	D	Classif_MMHC	TYP_STRONG	TYP_STRONG
25	D	Group_SVM_LeftHemisphere_Zago2017	Dominant	TYP_STRONG
25	D	Group_SVM_RightHemisphere_Zago2017	Non-dominant	TYP_STRONG
26	D	Class_HFLI_PROD_Mazoyer2014	Typical	TYP_STRONG
26	D	Classif_MMHC	TYP_STRONG	TYP_STRONG
26	D	Group_SVM_LeftHemisphere_Zago2017	Dominant	TYP_STRONG
26	D	Group_SVM_RightHemisphere_Zago2017	Non-dominant	TYP_STRONG
27	D	Class_HFLI_PROD_Mazoyer2014	Typical	TYP_MILD
27	D	Classif_MMHC	TYP_MILD	TYP_MILD
27	D	Group_SVM_LeftHemisphere_Zago2017	Dominant	TYP_MILD
27	D	Group_SVM_RightHemisphere_Zago2017	Non-dominant	TYP_MILD
28	D	Class_HFLI_PROD_Mazoyer2014	Typical	TYP_MILD
28	D	Classif_MMHC	TYP_MILD	TYP_MILD
28	D	Group_SVM_LeftHemisphere_Zago2017	Dominant	TYP_MILD
28	D	Group_SVM_RightHemisphere_Zago2017	Non-dominant	TYP_MILD
29	G	Class_HFLI_PROD_Mazoyer2014	Typical	TYP_MILD
29	G	Classif_MMHC	TYP_MILD	TYP_MILD
29	G	Group_SVM_LeftHemisphere_Zago2017	Dominant	TYP_MILD
29	G	Group_SVM_RightHemisphere_Zago2017	Non-dominant	TYP_MILD
30	D	Class_HFLI_PROD_Mazoyer2014	Typical	TYP_MILD
30	D	Classif_MMHC	TYP_MILD	TYP_MILD
30	D	Group_SVM_LeftHemisphere_Zago2017	Dominant	TYP_MILD
30	D	Group_SVM_RightHemisphere_Zago2017	Non-dominant	TYP_MILD
31	D	Class_HFLI_PROD_Mazoyer2014	Typical	TYP_MILD
31	D	Classif_MMHC	TYP_MILD	TYP_MILD
31	D	Group_SVM_LeftHemisphere_Zago2017	Dominant	TYP_MILD
31	D	Group_SVM_RightHemisphere_Zago2017	Non-dominant	TYP_MILD
32	D	Class_HFLI_PROD_Mazoyer2014	Typical	TYP_MILD
32	D	Classif_MMHC	TYP_MILD	TYP_MILD
32	D	Group_SVM_LeftHemisphere_Zago2017	Dominant	TYP_MILD
32	D	Group_SVM_RightHemisphere_Zago2017	Non-dominant	TYP_MILD
33	D	Class_HFLI_PROD_Mazoyer2014	Typical	TYP_MILD
33	D	Classif_MMHC	TYP_MILD	TYP_MILD
33	D	Group_SVM_LeftHemisphere_Zago2017	Dominant	TYP_MILD
33	D	Group_SVM_RightHemisphere_Zago2017	Non-dominant	TYP_MILD
34	D	Class_HFLI_PROD_Mazoyer2014	Typical	TYP_STRONG
34	D	Classif_MMHC	TYP_STRONG	TYP_STRONG
34	D	Group_SVM_LeftHemisphere_Zago2017	Dominant	TYP_STRONG
34	D	Group_SVM_RightHemisphere_Zago2017	Non-dominant	TYP_STRONG
35	G	Class_HFLI_PROD_Mazoyer2014	Typical	TYP_STRONG
35	G	Classif_MMHC	TYP_STRONG	TYP_STRONG
35	G	Group_SVM_LeftHemisphere_Zago2017	Dominant	TYP_STRONG
35	G	Group_SVM_RightHemisphere_Zago2017	Non-dominant	TYP_STRONG
36	G	Class_HFLI_PROD_Mazoyer2014	Typical	TYP_STRONG
36	G	Classif_MMHC	TYP_STRONG	TYP_STRONG
36	G	Group_SVM_LeftHemisphere_Zago2017	Dominant	TYP_STRONG
36	G	Group_SVM_RightHemisphere_Zago2017	Non-dominant	TYP_STRONG
37	G	Class_HFLI_PROD_Mazoyer2014	Typical	TYP_STRONG
37	G	Classif_MMHC	TYP_STRONG	TYP_STRONG
37	G	Group_SVM_LeftHemisphere_Zago2017	Dominant	TYP_STRONG
37	G	Group_SVM_RightHemisphere_Zago2017	Non-dominant	TYP_STRONG
38	G	Class_HFLI_PROD_Mazoyer2014	Ambilateral	ATYP
38	G	Classif_MMHC	ATYP	ATYP
38	G	Group_SVM_LeftHemisphere_Zago2017	Dominant	ATYP
38	G	Group_SVM_RightHemisphere_Zago2017	Non-dominant	ATYP
39	G	Class_HFLI_PROD_Mazoyer2014	Typical	ATYP
39	G	Classif_MMHC	ATYP	ATYP
39	G	Group_SVM_LeftHemisphere_Zago2017	Dominant	ATYP
39	G	Group_SVM_RightHemisphere_Zago2017	Non-dominant	ATYP
40	G	Class_HFLI_PROD_Mazoyer2014	Ambilateral	TYP_MILD
40	G	Classif_MMHC	TYP_MILD	TYP_MILD
40	G	Group_SVM_LeftHemisphere_Zago2017	Dominant	TYP_MILD
40	G	Group_SVM_RightHemisphere_Zago2017	Non-dominant	TYP_MILD
41	G	Class_HFLI_PROD_Mazoyer2014	Typical	TYP_STRONG
41	G	Classif_MMHC	TYP_STRONG	TYP_STRONG
41	G	Group_SVM_LeftHemisphere_Zago2017	Dominant	TYP_STRONG
41	G	Group_SVM_RightHemisphere_Zago2017	Non-dominant	TYP_STRONG
42	G	Class_HFLI_PROD_Mazoyer2014	Typical	TYP_MILD
42	G	Classif_MMHC	TYP_MILD	TYP_MILD
42	G	Group_SVM_LeftHemisphere_Zago2017	Dominant	TYP_MILD
42	G	Group_SVM_RightHemisphere_Zago2017	Non-dominant	TYP_MILD
43	G	Class_HFLI_PROD_Mazoyer2014	Typical	TYP_MILD
43	G	Classif_MMHC	TYP_MILD	TYP_MILD
43	G	Group_SVM_LeftHemisphere_Zago2017	Dominant	TYP_MILD
43	G	Group_SVM_RightHemisphere_Zago2017	Non-dominant	TYP_MILD
44	G	Class_HFLI_PROD_Mazoyer2014	Strong-atypical	ATYP
44	G	Classif_MMHC	ATYP	ATYP
44	G	Group_SVM_LeftHemisphere_Zago2017	Non-dominant	ATYP
44	G	Group_SVM_RightHemisphere_Zago2017	Dominant	ATYP
45	D	Class_HFLI_PROD_Mazoyer2014	Typical	TYP_MILD
45	D	Classif_MMHC	TYP_MILD	TYP_MILD
45	D	Group_SVM_LeftHemisphere_Zago2017	Dominant	TYP_MILD
45	D	Group_SVM_RightHemisphere_Zago2017	Non-dominant	TYP_MILD
46	G	Class_HFLI_PROD_Mazoyer2014	Typical	TYP_STRONG
46	G	Classif_MMHC	TYP_STRONG	TYP_STRONG
46	G	Group_SVM_LeftHemisphere_Zago2017	Dominant	TYP_STRONG
46	G	Group_SVM_RightHemisphere_Zago2017	Non-dominant	TYP_STRONG
47	G	Class_HFLI_PROD_Mazoyer2014	Typical	TYP_STRONG
47	G	Classif_MMHC	TYP_STRONG	TYP_STRONG
47	G	Group_SVM_LeftHemisphere_Zago2017	Dominant	TYP_STRONG
47	G	Group_SVM_RightHemisphere_Zago2017	Non-dominant	TYP_STRONG
48	G	Class_HFLI_PROD_Mazoyer2014	Typical	TYP_MILD
48	G	Classif_MMHC	TYP_MILD	TYP_MILD
48	G	Group_SVM_LeftHemisphere_Zago2017	Dominant	TYP_MILD
48	G	Group_SVM_RightHemisphere_Zago2017	Non-dominant	TYP_MILD
49	G	Class_HFLI_PROD_Mazoyer2014	Typical	TYP_MILD
49	G	Classif_MMHC	TYP_MILD	TYP_MILD
49	G	Group_SVM_LeftHemisphere_Zago2017	Dominant	TYP_MILD
49	G	Group_SVM_RightHemisphere_Zago2017	Non-dominant	TYP_MILD
50	G	Class_HFLI_PROD_Mazoyer2014	Typical	TYP_MILD
50	G	Classif_MMHC	TYP_MILD	TYP_MILD
50	G	Group_SVM_LeftHemisphere_Zago2017	Dominant	TYP_MILD
50	G	Group_SVM_RightHemisphere_Zago2017	Non-dominant	TYP_MILD
51	G	Class_HFLI_PROD_Mazoyer2014	Ambilateral	TYP_STRONG
51	G	Classif_MMHC	TYP_STRONG	TYP_STRONG
51	G	Group_SVM_LeftHemisphere_Zago2017	Dominant	TYP_STRONG
51	G	Group_SVM_RightHemisphere_Zago2017	Non-dominant	TYP_STRONG
52	G	Class_HFLI_PROD_Mazoyer2014	Typical	TYP_STRONG
52	G	Classif_MMHC	TYP_STRONG	TYP_STRONG
52	G	Group_SVM_LeftHemisphere_Zago2017	Dominant	TYP_STRONG
52	G	Group_SVM_RightHemisphere_Zago2017	Non-dominant	TYP_STRONG
53	G	Class_HFLI_PROD_Mazoyer2014	Typical	TYP_MILD
53	G	Classif_MMHC	TYP_MILD	TYP_MILD
53	G	Group_SVM_LeftHemisphere_Zago2017	Non-dominant	TYP_MILD
53	G	Group_SVM_RightHemisphere_Zago2017	Non-dominant	TYP_MILD
54	G	Class_HFLI_PROD_Mazoyer2014	Typical	TYP_MILD
54	G	Classif_MMHC	TYP_MILD	TYP_MILD
54	G	Group_SVM_LeftHemisphere_Zago2017	Dominant	TYP_MILD
54	G	Group_SVM_RightHemisphere_Zago2017	Non-dominant	TYP_MILD
55	G	Class_HFLI_PROD_Mazoyer2014	Typical	TYP_MILD
55	G	Classif_MMHC	TYP_MILD	TYP_MILD
55	G	Group_SVM_LeftHemisphere_Zago2017	Dominant	TYP_MILD
55	G	Group_SVM_RightHemisphere_Zago2017	Non-dominant	TYP_MILD
56	G	Class_HFLI_PROD_Mazoyer2014	Typical	TYP_STRONG
56	G	Classif_MMHC	TYP_STRONG	TYP_STRONG
56	G	Group_SVM_LeftHemisphere_Zago2017	Dominant	TYP_STRONG
56	G	Group_SVM_RightHemisphere_Zago2017	Non-dominant	TYP_STRONG
57	G	Class_HFLI_PROD_Mazoyer2014	Typical	TYP_STRONG
57	G	Classif_MMHC	TYP_STRONG	TYP_STRONG
57	G	Group_SVM_LeftHemisphere_Zago2017	Dominant	TYP_STRONG
57	G	Group_SVM_RightHemisphere_Zago2017	Non-dominant	TYP_STRONG
58	G	Class_HFLI_PROD_Mazoyer2014	Typical	TYP_STRONG
58	G	Classif_MMHC	TYP_STRONG	TYP_STRONG
58	G	Group_SVM_LeftHemisphere_Zago2017	Dominant	TYP_STRONG
58	G	Group_SVM_RightHemisphere_Zago2017	Non-dominant	TYP_STRONG
59	G	Class_HFLI_PROD_Mazoyer2014	Typical	ATYP
59	G	Classif_MMHC	ATYP	ATYP
59	G	Group_SVM_LeftHemisphere_Zago2017	Dominant	ATYP
59	G	Group_SVM_RightHemisphere_Zago2017	Dominant	ATYP
60	G	Class_HFLI_PROD_Mazoyer2014	Typical	TYP_MILD
60	G	Classif_MMHC	TYP_MILD	TYP_MILD
60	G	Group_SVM_LeftHemisphere_Zago2017	Dominant	TYP_MILD
60	G	Group_SVM_RightHemisphere_Zago2017	Non-dominant	TYP_MILD
61	G	Class_HFLI_PROD_Mazoyer2014	Ambilateral	ATYP
61	G	Classif_MMHC	ATYP	ATYP
61	G	Group_SVM_LeftHemisphere_Zago2017	Non-dominant	ATYP
61	G	Group_SVM_RightHemisphere_Zago2017	Non-dominant	ATYP
62	G	Class_HFLI_PROD_Mazoyer2014	Typical	TYP_STRONG
62	G	Classif_MMHC	TYP_STRONG	TYP_STRONG
62	G	Group_SVM_LeftHemisphere_Zago2017	Dominant	TYP_STRONG
62	G	Group_SVM_RightHemisphere_Zago2017	Non-dominant	TYP_STRONG
63	G	Class_HFLI_PROD_Mazoyer2014	Typical	TYP_STRONG
63	G	Classif_MMHC	TYP_STRONG	TYP_STRONG
63	G	Group_SVM_LeftHemisphere_Zago2017	Dominant	TYP_STRONG
63	G	Group_SVM_RightHemisphere_Zago2017	Non-dominant	TYP_STRONG
64	G	Class_HFLI_PROD_Mazoyer2014	Strong-atypical	ATYP
64	G	Classif_MMHC	ATYP	ATYP
64	G	Group_SVM_LeftHemisphere_Zago2017	Non-dominant	ATYP
64	G	Group_SVM_RightHemisphere_Zago2017	Dominant	ATYP
65	G	Class_HFLI_PROD_Mazoyer2014	Typical	TYP_STRONG
65	G	Classif_MMHC	TYP_STRONG	TYP_STRONG
65	G	Group_SVM_LeftHemisphere_Zago2017	Dominant	TYP_STRONG
65	G	Group_SVM_RightHemisphere_Zago2017	Non-dominant	TYP_STRONG
66	G	Class_HFLI_PROD_Mazoyer2014	Ambilateral	ATYP
66	G	Classif_MMHC	ATYP	ATYP
66	G	Group_SVM_LeftHemisphere_Zago2017	Dominant	ATYP
66	G	Group_SVM_RightHemisphere_Zago2017	Dominant	ATYP
67	G	Class_HFLI_PROD_Mazoyer2014	Typical	TYP_MILD
67	G	Classif_MMHC	TYP_MILD	TYP_MILD
67	G	Group_SVM_LeftHemisphere_Zago2017	Non-dominant	TYP_MILD
67	G	Group_SVM_RightHemisphere_Zago2017	Non-dominant	TYP_MILD
68	G	Class_HFLI_PROD_Mazoyer2014	Typical	TYP_STRONG
68	G	Classif_MMHC	TYP_STRONG	TYP_STRONG
68	G	Group_SVM_LeftHemisphere_Zago2017	Dominant	TYP_STRONG
68	G	Group_SVM_RightHemisphere_Zago2017	Non-dominant	TYP_STRONG
69	G	Class_HFLI_PROD_Mazoyer2014	Typical	TYP_MILD
69	G	Classif_MMHC	TYP_MILD	TYP_MILD
69	G	Group_SVM_LeftHemisphere_Zago2017	Dominant	TYP_MILD
69	G	Group_SVM_RightHemisphere_Zago2017	Non-dominant	TYP_MILD
70	G	Class_HFLI_PROD_Mazoyer2014	Typical	TYP_MILD
70	G	Classif_MMHC	TYP_MILD	TYP_MILD
70	G	Group_SVM_LeftHemisphere_Zago2017	Dominant	TYP_MILD
70	G	Group_SVM_RightHemisphere_Zago2017	Non-dominant	TYP_MILD
71	G	Class_HFLI_PROD_Mazoyer2014	Typical	TYP_MILD
71	G	Classif_MMHC	TYP_MILD	TYP_MILD
71	G	Group_SVM_LeftHemisphere_Zago2017	Dominant	TYP_MILD
71	G	Group_SVM_RightHemisphere_Zago2017	Non-dominant	TYP_MILD
72	G	Class_HFLI_PROD_Mazoyer2014	Typical	TYP_STRONG
72	G	Classif_MMHC	TYP_STRONG	TYP_STRONG
72	G	Group_SVM_LeftHemisphere_Zago2017	Dominant	TYP_STRONG
72	G	Group_SVM_RightHemisphere_Zago2017	Non-dominant	TYP_STRONG
73	G	Class_HFLI_PROD_Mazoyer2014	Typical	TYP_MILD
73	G	Classif_MMHC	TYP_MILD	TYP_MILD
73	G	Group_SVM_LeftHemisphere_Zago2017	Dominant	TYP_MILD
73	G	Group_SVM_RightHemisphere_Zago2017	Non-dominant	TYP_MILD
74	G	Class_HFLI_PROD_Mazoyer2014	Typical	TYP_STRONG
74	G	Classif_MMHC	TYP_STRONG	TYP_STRONG
74	G	Group_SVM_LeftHemisphere_Zago2017	Dominant	TYP_STRONG
74	G	Group_SVM_RightHemisphere_Zago2017	Non-dominant	TYP_STRONG
75	G	Class_HFLI_PROD_Mazoyer2014	Typical	TYP_MILD
75	G	Classif_MMHC	TYP_MILD	TYP_MILD
75	G	Group_SVM_LeftHemisphere_Zago2017	Dominant	TYP_MILD
75	G	Group_SVM_RightHemisphere_Zago2017	Non-dominant	TYP_MILD
76	G	Class_HFLI_PROD_Mazoyer2014	Typical	TYP_STRONG
76	G	Classif_MMHC	TYP_STRONG	TYP_STRONG
76	G	Group_SVM_LeftHemisphere_Zago2017	Dominant	TYP_STRONG
76	G	Group_SVM_RightHemisphere_Zago2017	Non-dominant	TYP_STRONG
77	G	Class_HFLI_PROD_Mazoyer2014	Typical	TYP_MILD
77	G	Classif_MMHC	TYP_MILD	TYP_MILD
77	G	Group_SVM_LeftHemisphere_Zago2017	Dominant	TYP_MILD
77	G	Group_SVM_RightHemisphere_Zago2017	Non-dominant	TYP_MILD
78	G	Class_HFLI_PROD_Mazoyer2014	Ambilateral	TYP_MILD
78	G	Classif_MMHC	TYP_MILD	TYP_MILD
78	G	Group_SVM_LeftHemisphere_Zago2017	Dominant	TYP_MILD
78	G	Group_SVM_RightHemisphere_Zago2017	Non-dominant	TYP_MILD
79	G	Class_HFLI_PROD_Mazoyer2014	Typical	TYP_STRONG
79	G	Classif_MMHC	TYP_STRONG	TYP_STRONG
79	G	Group_SVM_LeftHemisphere_Zago2017	Dominant	TYP_STRONG
79	G	Group_SVM_RightHemisphere_Zago2017	Non-dominant	TYP_STRONG
80	G	Class_HFLI_PROD_Mazoyer2014	Typical	TYP_MILD
80	G	Classif_MMHC	TYP_MILD	TYP_MILD
80	G	Group_SVM_LeftHemisphere_Zago2017	Dominant	TYP_MILD
80	G	Group_SVM_RightHemisphere_Zago2017	Non-dominant	TYP_MILD
81	G	Class_HFLI_PROD_Mazoyer2014	Ambilateral	TYP_STRONG
81	G	Classif_MMHC	TYP_STRONG	TYP_STRONG
81	G	Group_SVM_LeftHemisphere_Zago2017	Dominant	TYP_STRONG
81	G	Group_SVM_RightHemisphere_Zago2017	Non-dominant	TYP_STRONG
82	G	Class_HFLI_PROD_Mazoyer2014	Ambilateral	TYP_STRONG
82	G	Classif_MMHC	TYP_STRONG	TYP_STRONG
82	G	Group_SVM_LeftHemisphere_Zago2017	Dominant	TYP_STRONG
82	G	Group_SVM_RightHemisphere_Zago2017	Non-dominant	TYP_STRONG
83	G	Class_HFLI_PROD_Mazoyer2014	Typical	TYP_STRONG
83	G	Classif_MMHC	TYP_STRONG	TYP_STRONG
83	G	Group_SVM_LeftHemisphere_Zago2017	Dominant	TYP_STRONG
83	G	Group_SVM_RightHemisphere_Zago2017	Non-dominant	TYP_STRONG
84	G	Class_HFLI_PROD_Mazoyer2014	Typical	TYP_MILD
84	G	Classif_MMHC	TYP_MILD	TYP_MILD
84	G	Group_SVM_LeftHemisphere_Zago2017	Dominant	TYP_MILD
84	G	Group_SVM_RightHemisphere_Zago2017	Non-dominant	TYP_MILD
85	G	Class_HFLI_PROD_Mazoyer2014	Typical	TYP_MILD
85	G	Classif_MMHC	TYP_MILD	TYP_MILD
85	G	Group_SVM_LeftHemisphere_Zago2017	Dominant	TYP_MILD
85	G	Group_SVM_RightHemisphere_Zago2017	Non-dominant	TYP_MILD
86	G	Class_HFLI_PROD_Mazoyer2014	Typical	TYP_MILD
86	G	Classif_MMHC	TYP_MILD	TYP_MILD
86	G	Group_SVM_LeftHemisphere_Zago2017	Dominant	TYP_MILD
86	G	Group_SVM_RightHemisphere_Zago2017	Non-dominant	TYP_MILD
87	G	Class_HFLI_PROD_Mazoyer2014	Ambilateral	ATYP
87	G	Classif_MMHC	ATYP	ATYP
87	G	Group_SVM_LeftHemisphere_Zago2017	Non-dominant	ATYP
87	G	Group_SVM_RightHemisphere_Zago2017	Dominant	ATYP
88	G	Class_HFLI_PROD_Mazoyer2014	Typical	TYP_STRONG
88	G	Classif_MMHC	TYP_STRONG	TYP_STRONG
88	G	Group_SVM_LeftHemisphere_Zago2017	Dominant	TYP_STRONG
88	G	Group_SVM_RightHemisphere_Zago2017	Non-dominant	TYP_STRONG
89	G	Class_HFLI_PROD_Mazoyer2014	Ambilateral	ATYP
89	G	Classif_MMHC	ATYP	ATYP
89	G	Group_SVM_LeftHemisphere_Zago2017	Dominant	ATYP
89	G	Group_SVM_RightHemisphere_Zago2017	Non-dominant	ATYP
90	G	Class_HFLI_PROD_Mazoyer2014	Typical	TYP_STRONG
90	G	Classif_MMHC	TYP_STRONG	TYP_STRONG
90	G	Group_SVM_LeftHemisphere_Zago2017	Dominant	TYP_STRONG
90	G	Group_SVM_RightHemisphere_Zago2017	Non-dominant	TYP_STRONG
91	G	Class_HFLI_PROD_Mazoyer2014	Typical	TYP_MILD
91	G	Classif_MMHC	TYP_MILD	TYP_MILD
91	G	Group_SVM_LeftHemisphere_Zago2017	Dominant	TYP_MILD
91	G	Group_SVM_RightHemisphere_Zago2017	Non-dominant	TYP_MILD
92	G	Class_HFLI_PROD_Mazoyer2014	Typical	TYP_STRONG
92	G	Classif_MMHC	TYP_STRONG	TYP_STRONG
92	G	Group_SVM_LeftHemisphere_Zago2017	Dominant	TYP_STRONG
92	G	Group_SVM_RightHemisphere_Zago2017	Non-dominant	TYP_STRONG
93	G	Class_HFLI_PROD_Mazoyer2014	Strong-atypical	ATYP
93	G	Classif_MMHC	ATYP	ATYP
93	G	Group_SVM_LeftHemisphere_Zago2017	Non-dominant	ATYP
93	G	Group_SVM_RightHemisphere_Zago2017	Dominant	ATYP
94	G	Class_HFLI_PROD_Mazoyer2014	Ambilateral	ATYP
94	G	Classif_MMHC	ATYP	ATYP
94	G	Group_SVM_LeftHemisphere_Zago2017	Dominant	ATYP
94	G	Group_SVM_RightHemisphere_Zago2017	Non-dominant	ATYP
95	G	Class_HFLI_PROD_Mazoyer2014	Typical	TYP_STRONG
95	G	Classif_MMHC	TYP_STRONG	TYP_STRONG
95	G	Group_SVM_LeftHemisphere_Zago2017	Dominant	TYP_STRONG
95	G	Group_SVM_RightHemisphere_Zago2017	Non-dominant	TYP_STRONG
96	D	Class_HFLI_PROD_Mazoyer2014	Ambilateral	TYP_MILD
96	D	Classif_MMHC	TYP_MILD	TYP_MILD
96	D	Group_SVM_LeftHemisphere_Zago2017	Dominant	TYP_MILD
96	D	Group_SVM_RightHemisphere_Zago2017	Non-dominant	TYP_MILD
97	G	Class_HFLI_PROD_Mazoyer2014	Typical	TYP_MILD
97	G	Classif_MMHC	TYP_MILD	TYP_MILD
97	G	Group_SVM_LeftHemisphere_Zago2017	Dominant	TYP_MILD
97	G	Group_SVM_RightHemisphere_Zago2017	Non-dominant	TYP_MILD
98	G	Class_HFLI_PROD_Mazoyer2014	Typical	TYP_MILD
98	G	Classif_MMHC	TYP_MILD	TYP_MILD
98	G	Group_SVM_LeftHemisphere_Zago2017	Dominant	TYP_MILD
98	G	Group_SVM_RightHemisphere_Zago2017	Non-dominant	TYP_MILD
99	G	Class_HFLI_PROD_Mazoyer2014	Typical	TYP_MILD
99	G	Classif_MMHC	TYP_MILD	TYP_MILD
99	G	Group_SVM_LeftHemisphere_Zago2017	Dominant	TYP_MILD
99	G	Group_SVM_RightHemisphere_Zago2017	Non-dominant	TYP_MILD
100	D	Class_HFLI_PROD_Mazoyer2014	Typical	TYP_STRONG
100	D	Classif_MMHC	TYP_STRONG	TYP_STRONG
100	D	Group_SVM_LeftHemisphere_Zago2017	Dominant	TYP_STRONG
100	D	Group_SVM_RightHemisphere_Zago2017	Non-dominant	TYP_STRONG
101	G	Class_HFLI_PROD_Mazoyer2014	Typical	TYP_MILD
101	G	Classif_MMHC	TYP_MILD	TYP_MILD
101	G	Group_SVM_LeftHemisphere_Zago2017	Dominant	TYP_MILD
101	G	Group_SVM_RightHemisphere_Zago2017	Non-dominant	TYP_MILD
102	G	Class_HFLI_PROD_Mazoyer2014	Typical	TYP_MILD
102	G	Classif_MMHC	TYP_MILD	TYP_MILD
102	G	Group_SVM_LeftHemisphere_Zago2017	Dominant	TYP_MILD
102	G	Group_SVM_RightHemisphere_Zago2017	Non-dominant	TYP_MILD
103	G	Class_HFLI_PROD_Mazoyer2014	Typical	TYP_STRONG
103	G	Classif_MMHC	TYP_STRONG	TYP_STRONG
103	G	Group_SVM_LeftHemisphere_Zago2017	Dominant	TYP_STRONG
103	G	Group_SVM_RightHemisphere_Zago2017	Non-dominant	TYP_STRONG
104	G	Class_HFLI_PROD_Mazoyer2014	Typical	TYP_STRONG
104	G	Classif_MMHC	TYP_STRONG	TYP_STRONG
104	G	Group_SVM_LeftHemisphere_Zago2017	Dominant	TYP_STRONG
104	G	Group_SVM_RightHemisphere_Zago2017	Non-dominant	TYP_STRONG
105	G	Class_HFLI_PROD_Mazoyer2014	Typical	TYP_STRONG
105	G	Classif_MMHC	TYP_STRONG	TYP_STRONG
105	G	Group_SVM_LeftHemisphere_Zago2017	Dominant	TYP_STRONG
105	G	Group_SVM_RightHemisphere_Zago2017	Non-dominant	TYP_STRONG
106	G	Class_HFLI_PROD_Mazoyer2014	Ambilateral	TYP_MILD
106	G	Classif_MMHC	TYP_MILD	TYP_MILD
106	G	Group_SVM_LeftHemisphere_Zago2017	Dominant	TYP_MILD
106	G	Group_SVM_RightHemisphere_Zago2017	Non-dominant	TYP_MILD
107	G	Class_HFLI_PROD_Mazoyer2014	Ambilateral	TYP_MILD
107	G	Classif_MMHC	TYP_MILD	TYP_MILD
107	G	Group_SVM_LeftHemisphere_Zago2017	Dominant	TYP_MILD
107	G	Group_SVM_RightHemisphere_Zago2017	Dominant	TYP_MILD
108	G	Class_HFLI_PROD_Mazoyer2014	Typical	TYP_MILD
108	G	Classif_MMHC	TYP_MILD	TYP_MILD
108	G	Group_SVM_LeftHemisphere_Zago2017	Dominant	TYP_MILD
108	G	Group_SVM_RightHemisphere_Zago2017	Non-dominant	TYP_MILD
109	D	Class_HFLI_PROD_Mazoyer2014	Typical	TYP_STRONG
109	D	Classif_MMHC	TYP_STRONG	TYP_STRONG
109	D	Group_SVM_LeftHemisphere_Zago2017	Dominant	TYP_STRONG
109	D	Group_SVM_RightHemisphere_Zago2017	Non-dominant	TYP_STRONG
110	D	Class_HFLI_PROD_Mazoyer2014	Typical	TYP_MILD
110	D	Classif_MMHC	TYP_MILD	TYP_MILD
110	D	Group_SVM_LeftHemisphere_Zago2017	Dominant	TYP_MILD
110	D	Group_SVM_RightHemisphere_Zago2017	Non-dominant	TYP_MILD
111	D	Class_HFLI_PROD_Mazoyer2014	Ambilateral	ATYP
111	D	Classif_MMHC	ATYP	ATYP
111	D	Group_SVM_LeftHemisphere_Zago2017	Dominant	ATYP
111	D	Group_SVM_RightHemisphere_Zago2017	Dominant	ATYP
112	D	Class_HFLI_PROD_Mazoyer2014	Typical	TYP_MILD
112	D	Classif_MMHC	TYP_MILD	TYP_MILD
112	D	Group_SVM_LeftHemisphere_Zago2017	Dominant	TYP_MILD
112	D	Group_SVM_RightHemisphere_Zago2017	Non-dominant	TYP_MILD
113	D	Class_HFLI_PROD_Mazoyer2014	Typical	TYP_MILD
113	D	Classif_MMHC	TYP_MILD	TYP_MILD
113	D	Group_SVM_LeftHemisphere_Zago2017	Dominant	TYP_MILD
113	D	Group_SVM_RightHemisphere_Zago2017	Non-dominant	TYP_MILD
114	D	Class_HFLI_PROD_Mazoyer2014	Typical	TYP_MILD
114	D	Classif_MMHC	TYP_MILD	TYP_MILD
114	D	Group_SVM_LeftHemisphere_Zago2017	Dominant	TYP_MILD
114	D	Group_SVM_RightHemisphere_Zago2017	Non-dominant	TYP_MILD
115	D	Class_HFLI_PROD_Mazoyer2014	Typical	TYP_STRONG
115	D	Classif_MMHC	TYP_STRONG	TYP_STRONG
115	D	Group_SVM_LeftHemisphere_Zago2017	Dominant	TYP_STRONG
115	D	Group_SVM_RightHemisphere_Zago2017	Non-dominant	TYP_STRONG
116	D	Class_HFLI_PROD_Mazoyer2014	Typical	TYP_STRONG
116	D	Classif_MMHC	TYP_STRONG	TYP_STRONG
116	D	Group_SVM_LeftHemisphere_Zago2017	Dominant	TYP_STRONG
116	D	Group_SVM_RightHemisphere_Zago2017	Non-dominant	TYP_STRONG
117	D	Class_HFLI_PROD_Mazoyer2014	Typical	ATYP
117	D	Classif_MMHC	ATYP	ATYP
117	D	Group_SVM_LeftHemisphere_Zago2017	Dominant	ATYP
117	D	Group_SVM_RightHemisphere_Zago2017	Non-dominant	ATYP
118	D	Class_HFLI_PROD_Mazoyer2014	Typical	TYP_MILD
118	D	Classif_MMHC	TYP_MILD	TYP_MILD
118	D	Group_SVM_LeftHemisphere_Zago2017	Dominant	TYP_MILD
118	D	Group_SVM_RightHemisphere_Zago2017	Non-dominant	TYP_MILD
119	D	Class_HFLI_PROD_Mazoyer2014	Typical	TYP_STRONG
119	D	Classif_MMHC	TYP_STRONG	TYP_STRONG
119	D	Group_SVM_LeftHemisphere_Zago2017	Dominant	TYP_STRONG
119	D	Group_SVM_RightHemisphere_Zago2017	Non-dominant	TYP_STRONG
120	D	Class_HFLI_PROD_Mazoyer2014	Ambilateral	ATYP
120	D	Classif_MMHC	ATYP	ATYP
120	D	Group_SVM_LeftHemisphere_Zago2017	Dominant	ATYP
120	D	Group_SVM_RightHemisphere_Zago2017	Non-dominant	ATYP
121	D	Class_HFLI_PROD_Mazoyer2014	Typical	TYP_STRONG
121	D	Classif_MMHC	TYP_STRONG	TYP_STRONG
121	D	Group_SVM_LeftHemisphere_Zago2017	Dominant	TYP_STRONG
121	D	Group_SVM_RightHemisphere_Zago2017	Non-dominant	TYP_STRONG
122	D	Class_HFLI_PROD_Mazoyer2014	Typical	TYP_STRONG
122	D	Classif_MMHC	TYP_STRONG	TYP_STRONG
122	D	Group_SVM_LeftHemisphere_Zago2017	Dominant	TYP_STRONG
122	D	Group_SVM_RightHemisphere_Zago2017	Non-dominant	TYP_STRONG
123	D	Class_HFLI_PROD_Mazoyer2014	Typical	TYP_MILD
123	D	Classif_MMHC	TYP_MILD	TYP_MILD
123	D	Group_SVM_LeftHemisphere_Zago2017	Dominant	TYP_MILD
123	D	Group_SVM_RightHemisphere_Zago2017	Non-dominant	TYP_MILD
124	D	Class_HFLI_PROD_Mazoyer2014	Typical	TYP_MILD
124	D	Classif_MMHC	TYP_MILD	TYP_MILD
124	D	Group_SVM_LeftHemisphere_Zago2017	Dominant	TYP_MILD
124	D	Group_SVM_RightHemisphere_Zago2017	Non-dominant	TYP_MILD
125	D	Class_HFLI_PROD_Mazoyer2014	Typical	TYP_STRONG
125	D	Classif_MMHC	TYP_STRONG	TYP_STRONG
125	D	Group_SVM_LeftHemisphere_Zago2017	Dominant	TYP_STRONG
125	D	Group_SVM_RightHemisphere_Zago2017	Non-dominant	TYP_STRONG
126	D	Class_HFLI_PROD_Mazoyer2014	Typical	TYP_STRONG
126	D	Classif_MMHC	TYP_STRONG	TYP_STRONG
126	D	Group_SVM_LeftHemisphere_Zago2017	Dominant	TYP_STRONG
126	D	Group_SVM_RightHemisphere_Zago2017	Non-dominant	TYP_STRONG
127	D	Class_HFLI_PROD_Mazoyer2014	Typical	TYP_STRONG
127	D	Classif_MMHC	TYP_STRONG	TYP_STRONG
127	D	Group_SVM_LeftHemisphere_Zago2017	Dominant	TYP_STRONG
127	D	Group_SVM_RightHemisphere_Zago2017	Non-dominant	TYP_STRONG
128	D	Class_HFLI_PROD_Mazoyer2014	Typical	TYP_STRONG
128	D	Classif_MMHC	TYP_STRONG	TYP_STRONG
128	D	Group_SVM_LeftHemisphere_Zago2017	Dominant	TYP_STRONG
128	D	Group_SVM_RightHemisphere_Zago2017	Non-dominant	TYP_STRONG
129	G	Class_HFLI_PROD_Mazoyer2014	Typical	ATYP
129	G	Classif_MMHC	ATYP	ATYP
129	G	Group_SVM_LeftHemisphere_Zago2017	Dominant	ATYP
129	G	Group_SVM_RightHemisphere_Zago2017	Non-dominant	ATYP
130	D	Class_HFLI_PROD_Mazoyer2014	Typical	TYP_STRONG
130	D	Classif_MMHC	TYP_STRONG	TYP_STRONG
130	D	Group_SVM_LeftHemisphere_Zago2017	Dominant	TYP_STRONG
130	D	Group_SVM_RightHemisphere_Zago2017	Non-dominant	TYP_STRONG
131	G	Class_HFLI_PROD_Mazoyer2014	Typical	TYP_MILD
131	G	Classif_MMHC	TYP_MILD	TYP_MILD
131	G	Group_SVM_LeftHemisphere_Zago2017	Dominant	TYP_MILD
131	G	Group_SVM_RightHemisphere_Zago2017	Non-dominant	TYP_MILD
132	G	Class_HFLI_PROD_Mazoyer2014	Typical	TYP_STRONG
132	G	Classif_MMHC	TYP_STRONG	TYP_STRONG
132	G	Group_SVM_LeftHemisphere_Zago2017	Dominant	TYP_STRONG
132	G	Group_SVM_RightHemisphere_Zago2017	Non-dominant	TYP_STRONG
133	D	Class_HFLI_PROD_Mazoyer2014	Typical	TYP_MILD
133	D	Classif_MMHC	TYP_MILD	TYP_MILD
133	D	Group_SVM_LeftHemisphere_Zago2017	Dominant	TYP_MILD
133	D	Group_SVM_RightHemisphere_Zago2017	Non-dominant	TYP_MILD
134	G	Class_HFLI_PROD_Mazoyer2014	Typical	TYP_STRONG
134	G	Classif_MMHC	TYP_STRONG	TYP_STRONG
134	G	Group_SVM_LeftHemisphere_Zago2017	Dominant	TYP_STRONG
134	G	Group_SVM_RightHemisphere_Zago2017	Non-dominant	TYP_STRONG
135	G	Class_HFLI_PROD_Mazoyer2014	Typical	TYP_MILD
135	G	Classif_MMHC	TYP_MILD	TYP_MILD
135	G	Group_SVM_LeftHemisphere_Zago2017	Dominant	TYP_MILD
135	G	Group_SVM_RightHemisphere_Zago2017	Non-dominant	TYP_MILD
136	D	Class_HFLI_PROD_Mazoyer2014	Typical	TYP_STRONG
136	D	Classif_MMHC	TYP_STRONG	TYP_STRONG
136	D	Group_SVM_LeftHemisphere_Zago2017	Dominant	TYP_STRONG
136	D	Group_SVM_RightHemisphere_Zago2017	Non-dominant	TYP_STRONG
137	G	Class_HFLI_PROD_Mazoyer2014	Typical	TYP_STRONG
137	G	Classif_MMHC	TYP_STRONG	TYP_STRONG
137	G	Group_SVM_LeftHemisphere_Zago2017	Dominant	TYP_STRONG
137	G	Group_SVM_RightHemisphere_Zago2017	Non-dominant	TYP_STRONG
138	G	Class_HFLI_PROD_Mazoyer2014	Typical	TYP_MILD
138	G	Classif_MMHC	TYP_MILD	TYP_MILD
138	G	Group_SVM_LeftHemisphere_Zago2017	Dominant	TYP_MILD
138	G	Group_SVM_RightHemisphere_Zago2017	Non-dominant	TYP_MILD
139	D	Class_HFLI_PROD_Mazoyer2014	Typical	TYP_MILD
139	D	Classif_MMHC	TYP_MILD	TYP_MILD
139	D	Group_SVM_LeftHemisphere_Zago2017	Dominant	TYP_MILD
139	D	Group_SVM_RightHemisphere_Zago2017	Non-dominant	TYP_MILD
140	G	Class_HFLI_PROD_Mazoyer2014	Ambilateral	ATYP
140	G	Classif_MMHC	ATYP	ATYP
140	G	Group_SVM_LeftHemisphere_Zago2017	Non-dominant	ATYP
140	G	Group_SVM_RightHemisphere_Zago2017	Dominant	ATYP
141	G	Class_HFLI_PROD_Mazoyer2014	Typical	TYP_MILD
141	G	Classif_MMHC	TYP_MILD	TYP_MILD
141	G	Group_SVM_LeftHemisphere_Zago2017	Dominant	TYP_MILD
141	G	Group_SVM_RightHemisphere_Zago2017	Non-dominant	TYP_MILD
142	G	Class_HFLI_PROD_Mazoyer2014	Typical	TYP_MILD
142	G	Classif_MMHC	TYP_MILD	TYP_MILD
142	G	Group_SVM_LeftHemisphere_Zago2017	Dominant	TYP_MILD
142	G	Group_SVM_RightHemisphere_Zago2017	Non-dominant	TYP_MILD
143	D	Class_HFLI_PROD_Mazoyer2014	Typical	TYP_MILD
143	D	Classif_MMHC	TYP_MILD	TYP_MILD
143	D	Group_SVM_LeftHemisphere_Zago2017	Dominant	TYP_MILD
143	D	Group_SVM_RightHemisphere_Zago2017	Non-dominant	TYP_MILD
144	G	Class_HFLI_PROD_Mazoyer2014	Strong-atypical	ATYP
144	G	Classif_MMHC	ATYP	ATYP
144	G	Group_SVM_LeftHemisphere_Zago2017	Non-dominant	ATYP
144	G	Group_SVM_RightHemisphere_Zago2017	Non-dominant	ATYP
145	G	Class_HFLI_PROD_Mazoyer2014	Typical	TYP_MILD
145	G	Classif_MMHC	TYP_MILD	TYP_MILD
145	G	Group_SVM_LeftHemisphere_Zago2017	Dominant	TYP_MILD
145	G	Group_SVM_RightHemisphere_Zago2017	Non-dominant	TYP_MILD
146	G	Class_HFLI_PROD_Mazoyer2014	Ambilateral	ATYP
146	G	Classif_MMHC	ATYP	ATYP
146	G	Group_SVM_LeftHemisphere_Zago2017	Dominant	ATYP
146	G	Group_SVM_RightHemisphere_Zago2017	Dominant	ATYP
147	G	Class_HFLI_PROD_Mazoyer2014	Typical	TYP_STRONG
147	G	Classif_MMHC	TYP_STRONG	TYP_STRONG
147	G	Group_SVM_LeftHemisphere_Zago2017	Dominant	TYP_STRONG
147	G	Group_SVM_RightHemisphere_Zago2017	Non-dominant	TYP_STRONG
148	D	Class_HFLI_PROD_Mazoyer2014	Typical	TYP_MILD
148	D	Classif_MMHC	TYP_MILD	TYP_MILD
148	D	Group_SVM_LeftHemisphere_Zago2017	Dominant	TYP_MILD
148	D	Group_SVM_RightHemisphere_Zago2017	Non-dominant	TYP_MILD
149	G	Class_HFLI_PROD_Mazoyer2014	Typical	TYP_STRONG
149	G	Classif_MMHC	TYP_STRONG	TYP_STRONG
149	G	Group_SVM_LeftHemisphere_Zago2017	Dominant	TYP_STRONG
149	G	Group_SVM_RightHemisphere_Zago2017	Non-dominant	TYP_STRONG
150	G	Class_HFLI_PROD_Mazoyer2014	Typical	TYP_STRONG
150	G	Classif_MMHC	TYP_STRONG	TYP_STRONG
150	G	Group_SVM_LeftHemisphere_Zago2017	Dominant	TYP_STRONG
150	G	Group_SVM_RightHemisphere_Zago2017	Non-dominant	TYP_STRONG
151	G	Class_HFLI_PROD_Mazoyer2014	Typical	TYP_MILD
151	G	Classif_MMHC	TYP_MILD	TYP_MILD
151	G	Group_SVM_LeftHemisphere_Zago2017	Dominant	TYP_MILD
151	G	Group_SVM_RightHemisphere_Zago2017	Non-dominant	TYP_MILD
152	D	Class_HFLI_PROD_Mazoyer2014	Typical	TYP_MILD
152	D	Classif_MMHC	TYP_MILD	TYP_MILD
152	D	Group_SVM_LeftHemisphere_Zago2017	Dominant	TYP_MILD
152	D	Group_SVM_RightHemisphere_Zago2017	Non-dominant	TYP_MILD
153	G	Class_HFLI_PROD_Mazoyer2014	Typical	TYP_STRONG
153	G	Classif_MMHC	TYP_STRONG	TYP_STRONG
153	G	Group_SVM_LeftHemisphere_Zago2017	Dominant	TYP_STRONG
153	G	Group_SVM_RightHemisphere_Zago2017	Non-dominant	TYP_STRONG
154	G	Class_HFLI_PROD_Mazoyer2014	Typical	TYP_STRONG
154	G	Classif_MMHC	TYP_STRONG	TYP_STRONG
154	G	Group_SVM_LeftHemisphere_Zago2017	Dominant	TYP_STRONG
154	G	Group_SVM_RightHemisphere_Zago2017	Non-dominant	TYP_STRONG
155	G	Class_HFLI_PROD_Mazoyer2014	Typical	TYP_MILD
155	G	Classif_MMHC	TYP_MILD	TYP_MILD
155	G	Group_SVM_LeftHemisphere_Zago2017	Dominant	TYP_MILD
155	G	Group_SVM_RightHemisphere_Zago2017	Non-dominant	TYP_MILD
156	G	Class_HFLI_PROD_Mazoyer2014	Typical	TYP_MILD
156	G	Classif_MMHC	TYP_MILD	TYP_MILD
156	G	Group_SVM_LeftHemisphere_Zago2017	Dominant	TYP_MILD
156	G	Group_SVM_RightHemisphere_Zago2017	Non-dominant	TYP_MILD
157	G	Class_HFLI_PROD_Mazoyer2014	Typical	TYP_STRONG
157	G	Classif_MMHC	TYP_STRONG	TYP_STRONG
157	G	Group_SVM_LeftHemisphere_Zago2017	Dominant	TYP_STRONG
157	G	Group_SVM_RightHemisphere_Zago2017	Non-dominant	TYP_STRONG
158	D	Class_HFLI_PROD_Mazoyer2014	Typical	TYP_MILD
158	D	Classif_MMHC	TYP_MILD	TYP_MILD
158	D	Group_SVM_LeftHemisphere_Zago2017	Dominant	TYP_MILD
158	D	Group_SVM_RightHemisphere_Zago2017	Non-dominant	TYP_MILD
159	G	Class_HFLI_PROD_Mazoyer2014	Strong-atypical	ATYP
159	G	Classif_MMHC	ATYP	ATYP
159	G	Group_SVM_LeftHemisphere_Zago2017	Dominant	ATYP
159	G	Group_SVM_RightHemisphere_Zago2017	Dominant	ATYP
160	D	Class_HFLI_PROD_Mazoyer2014	Typical	TYP_MILD
160	D	Classif_MMHC	TYP_MILD	TYP_MILD
160	D	Group_SVM_LeftHemisphere_Zago2017	Dominant	TYP_MILD
160	D	Group_SVM_RightHemisphere_Zago2017	Non-dominant	TYP_MILD
161	D	Class_HFLI_PROD_Mazoyer2014	Typical	TYP_STRONG
161	D	Classif_MMHC	TYP_STRONG	TYP_STRONG
161	D	Group_SVM_LeftHemisphere_Zago2017	Dominant	TYP_STRONG
161	D	Group_SVM_RightHemisphere_Zago2017	Non-dominant	TYP_STRONG
162	G	Class_HFLI_PROD_Mazoyer2014	Typical	TYP_MILD
162	G	Classif_MMHC	TYP_MILD	TYP_MILD
162	G	Group_SVM_LeftHemisphere_Zago2017	Dominant	TYP_MILD
162	G	Group_SVM_RightHemisphere_Zago2017	Non-dominant	TYP_MILD
163	D	Class_HFLI_PROD_Mazoyer2014	Ambilateral	TYP_MILD
163	D	Classif_MMHC	TYP_MILD	TYP_MILD
163	D	Group_SVM_LeftHemisphere_Zago2017	Dominant	TYP_MILD
163	D	Group_SVM_RightHemisphere_Zago2017	Non-dominant	TYP_MILD
164	D	Class_HFLI_PROD_Mazoyer2014	Typical	TYP_STRONG
164	D	Classif_MMHC	TYP_STRONG	TYP_STRONG
164	D	Group_SVM_LeftHemisphere_Zago2017	Dominant	TYP_STRONG
164	D	Group_SVM_RightHemisphere_Zago2017	Non-dominant	TYP_STRONG
165	G	Class_HFLI_PROD_Mazoyer2014	Strong-atypical	ATYP
165	G	Classif_MMHC	ATYP	ATYP
165	G	Group_SVM_LeftHemisphere_Zago2017	Non-dominant	ATYP
165	G	Group_SVM_RightHemisphere_Zago2017	Dominant	ATYP
166	G	Class_HFLI_PROD_Mazoyer2014	Typical	TYP_STRONG
166	G	Classif_MMHC	TYP_STRONG	TYP_STRONG
166	G	Group_SVM_LeftHemisphere_Zago2017	Dominant	TYP_STRONG
166	G	Group_SVM_RightHemisphere_Zago2017	Non-dominant	TYP_STRONG
167	G	Class_HFLI_PROD_Mazoyer2014	Typical	TYP_STRONG
167	G	Classif_MMHC	TYP_STRONG	TYP_STRONG
167	G	Group_SVM_LeftHemisphere_Zago2017	Dominant	TYP_STRONG
167	G	Group_SVM_RightHemisphere_Zago2017	Non-dominant	TYP_STRONG
168	G	Class_HFLI_PROD_Mazoyer2014	Typical	TYP_MILD
168	G	Classif_MMHC	TYP_MILD	TYP_MILD
168	G	Group_SVM_LeftHemisphere_Zago2017	Dominant	TYP_MILD
168	G	Group_SVM_RightHemisphere_Zago2017	Non-dominant	TYP_MILD
169	G	Class_HFLI_PROD_Mazoyer2014	Typical	TYP_MILD
169	G	Classif_MMHC	TYP_MILD	TYP_MILD
169	G	Group_SVM_LeftHemisphere_Zago2017	Dominant	TYP_MILD
169	G	Group_SVM_RightHemisphere_Zago2017	Non-dominant	TYP_MILD
170	G	Class_HFLI_PROD_Mazoyer2014	Typical	TYP_MILD
170	G	Classif_MMHC	TYP_MILD	TYP_MILD
170	G	Group_SVM_LeftHemisphere_Zago2017	Dominant	TYP_MILD
170	G	Group_SVM_RightHemisphere_Zago2017	Non-dominant	TYP_MILD
171	G	Class_HFLI_PROD_Mazoyer2014	Typical	TYP_MILD
171	G	Classif_MMHC	TYP_MILD	TYP_MILD
171	G	Group_SVM_LeftHemisphere_Zago2017	Dominant	TYP_MILD
171	G	Group_SVM_RightHemisphere_Zago2017	Non-dominant	TYP_MILD
172	G	Class_HFLI_PROD_Mazoyer2014	Ambilateral	ATYP
172	G	Classif_MMHC	ATYP	ATYP
172	G	Group_SVM_LeftHemisphere_Zago2017	Dominant	ATYP
172	G	Group_SVM_RightHemisphere_Zago2017	Dominant	ATYP
173	G	Class_HFLI_PROD_Mazoyer2014	Typical	TYP_MILD
173	G	Classif_MMHC	TYP_MILD	TYP_MILD
173	G	Group_SVM_LeftHemisphere_Zago2017	Dominant	TYP_MILD
173	G	Group_SVM_RightHemisphere_Zago2017	Non-dominant	TYP_MILD
174	G	Class_HFLI_PROD_Mazoyer2014	Typical	TYP_MILD
174	G	Classif_MMHC	TYP_MILD	TYP_MILD
174	G	Group_SVM_LeftHemisphere_Zago2017	Dominant	TYP_MILD
174	G	Group_SVM_RightHemisphere_Zago2017	Non-dominant	TYP_MILD
175	G	Class_HFLI_PROD_Mazoyer2014	Typical	TYP_STRONG
175	G	Classif_MMHC	TYP_STRONG	TYP_STRONG
175	G	Group_SVM_LeftHemisphere_Zago2017	Dominant	TYP_STRONG
175	G	Group_SVM_RightHemisphere_Zago2017	Non-dominant	TYP_STRONG
176	G	Class_HFLI_PROD_Mazoyer2014	Typical	TYP_STRONG
176	G	Classif_MMHC	TYP_STRONG	TYP_STRONG
176	G	Group_SVM_LeftHemisphere_Zago2017	Dominant	TYP_STRONG
176	G	Group_SVM_RightHemisphere_Zago2017	Non-dominant	TYP_STRONG
177	G	Class_HFLI_PROD_Mazoyer2014	Ambilateral	TYP_MILD
177	G	Classif_MMHC	TYP_MILD	TYP_MILD
177	G	Group_SVM_LeftHemisphere_Zago2017	Dominant	TYP_MILD
177	G	Group_SVM_RightHemisphere_Zago2017	Non-dominant	TYP_MILD
178	G	Class_HFLI_PROD_Mazoyer2014	Typical	TYP_STRONG
178	G	Classif_MMHC	TYP_STRONG	TYP_STRONG
178	G	Group_SVM_LeftHemisphere_Zago2017	Dominant	TYP_STRONG
178	G	Group_SVM_RightHemisphere_Zago2017	Non-dominant	TYP_STRONG
179	G	Class_HFLI_PROD_Mazoyer2014	Typical	TYP_STRONG
179	G	Classif_MMHC	TYP_STRONG	TYP_STRONG
179	G	Group_SVM_LeftHemisphere_Zago2017	Dominant	TYP_STRONG
179	G	Group_SVM_RightHemisphere_Zago2017	Non-dominant	TYP_STRONG
180	G	Class_HFLI_PROD_Mazoyer2014	Typical	TYP_STRONG
180	G	Classif_MMHC	TYP_STRONG	TYP_STRONG
180	G	Group_SVM_LeftHemisphere_Zago2017	Dominant	TYP_STRONG
180	G	Group_SVM_RightHemisphere_Zago2017	Non-dominant	TYP_STRONG
181	G	Class_HFLI_PROD_Mazoyer2014	Typical	TYP_STRONG
181	G	Classif_MMHC	TYP_STRONG	TYP_STRONG
181	G	Group_SVM_LeftHemisphere_Zago2017	Dominant	TYP_STRONG
181	G	Group_SVM_RightHemisphere_Zago2017	Non-dominant	TYP_STRONG
182	D	Class_HFLI_PROD_Mazoyer2014	Typical	TYP_STRONG
182	D	Classif_MMHC	TYP_STRONG	TYP_STRONG
182	D	Group_SVM_LeftHemisphere_Zago2017	Dominant	TYP_STRONG
182	D	Group_SVM_RightHemisphere_Zago2017	Non-dominant	TYP_STRONG
183	D	Class_HFLI_PROD_Mazoyer2014	Typical	TYP_MILD
183	D	Classif_MMHC	TYP_MILD	TYP_MILD
183	D	Group_SVM_LeftHemisphere_Zago2017	Dominant	TYP_MILD
183	D	Group_SVM_RightHemisphere_Zago2017	Non-dominant	TYP_MILD
184	G	Class_HFLI_PROD_Mazoyer2014	Ambilateral	ATYP
184	G	Classif_MMHC	ATYP	ATYP
184	G	Group_SVM_LeftHemisphere_Zago2017	Dominant	ATYP
184	G	Group_SVM_RightHemisphere_Zago2017	Dominant	ATYP
185	G	Class_HFLI_PROD_Mazoyer2014	Typical	TYP_MILD
185	G	Classif_MMHC	TYP_MILD	TYP_MILD
185	G	Group_SVM_LeftHemisphere_Zago2017	Dominant	TYP_MILD
185	G	Group_SVM_RightHemisphere_Zago2017	Non-dominant	TYP_MILD
186	G	Class_HFLI_PROD_Mazoyer2014	Strong-atypical	ATYP
186	G	Classif_MMHC	ATYP	ATYP
186	G	Group_SVM_LeftHemisphere_Zago2017	Non-dominant	ATYP
186	G	Group_SVM_RightHemisphere_Zago2017	Dominant	ATYP
187	G	Class_HFLI_PROD_Mazoyer2014	Typical	TYP_STRONG
187	G	Classif_MMHC	TYP_STRONG	TYP_STRONG
187	G	Group_SVM_LeftHemisphere_Zago2017	Dominant	TYP_STRONG
187	G	Group_SVM_RightHemisphere_Zago2017	Non-dominant	TYP_STRONG
188	G	Class_HFLI_PROD_Mazoyer2014	Typical	TYP_STRONG
188	G	Classif_MMHC	TYP_STRONG	TYP_STRONG
188	G	Group_SVM_LeftHemisphere_Zago2017	Dominant	TYP_STRONG
188	G	Group_SVM_RightHemisphere_Zago2017	Non-dominant	TYP_STRONG
189	G	Class_HFLI_PROD_Mazoyer2014	Typical	TYP_MILD
189	G	Classif_MMHC	TYP_MILD	TYP_MILD
189	G	Group_SVM_LeftHemisphere_Zago2017	Dominant	TYP_MILD
189	G	Group_SVM_RightHemisphere_Zago2017	Non-dominant	TYP_MILD
190	D	Class_HFLI_PROD_Mazoyer2014	Typical	TYP_MILD
190	D	Classif_MMHC	TYP_MILD	TYP_MILD
190	D	Group_SVM_LeftHemisphere_Zago2017	Dominant	TYP_MILD
190	D	Group_SVM_RightHemisphere_Zago2017	Non-dominant	TYP_MILD
191	D	Class_HFLI_PROD_Mazoyer2014	Ambilateral	TYP_MILD
191	D	Classif_MMHC	TYP_MILD	TYP_MILD
191	D	Group_SVM_LeftHemisphere_Zago2017	Dominant	TYP_MILD
191	D	Group_SVM_RightHemisphere_Zago2017	Non-dominant	TYP_MILD
192	D	Class_HFLI_PROD_Mazoyer2014	Typical	TYP_MILD
192	D	Classif_MMHC	TYP_MILD	TYP_MILD
192	D	Group_SVM_LeftHemisphere_Zago2017	Dominant	TYP_MILD
192	D	Group_SVM_RightHemisphere_Zago2017	Non-dominant	TYP_MILD
193	D	Class_HFLI_PROD_Mazoyer2014	Typical	TYP_STRONG
193	D	Classif_MMHC	TYP_STRONG	TYP_STRONG
193	D	Group_SVM_LeftHemisphere_Zago2017	Dominant	TYP_STRONG
193	D	Group_SVM_RightHemisphere_Zago2017	Non-dominant	TYP_STRONG
194	D	Class_HFLI_PROD_Mazoyer2014	Typical	TYP_MILD
194	D	Classif_MMHC	TYP_MILD	TYP_MILD
194	D	Group_SVM_LeftHemisphere_Zago2017	Dominant	TYP_MILD
194	D	Group_SVM_RightHemisphere_Zago2017	Non-dominant	TYP_MILD
195	D	Class_HFLI_PROD_Mazoyer2014	Typical	TYP_MILD
195	D	Classif_MMHC	TYP_MILD	TYP_MILD
195	D	Group_SVM_LeftHemisphere_Zago2017	Dominant	TYP_MILD
195	D	Group_SVM_RightHemisphere_Zago2017	Non-dominant	TYP_MILD
196	D	Class_HFLI_PROD_Mazoyer2014	Typical	TYP_MILD
196	D	Classif_MMHC	TYP_MILD	TYP_MILD
196	D	Group_SVM_LeftHemisphere_Zago2017	Dominant	TYP_MILD
196	D	Group_SVM_RightHemisphere_Zago2017	Non-dominant	TYP_MILD
197	D	Class_HFLI_PROD_Mazoyer2014	Typical	TYP_STRONG
197	D	Classif_MMHC	TYP_STRONG	TYP_STRONG
197	D	Group_SVM_LeftHemisphere_Zago2017	Dominant	TYP_STRONG
197	D	Group_SVM_RightHemisphere_Zago2017	Non-dominant	TYP_STRONG
198	D	Class_HFLI_PROD_Mazoyer2014	Typical	TYP_MILD
198	D	Classif_MMHC	TYP_MILD	TYP_MILD
198	D	Group_SVM_LeftHemisphere_Zago2017	Dominant	TYP_MILD
198	D	Group_SVM_RightHemisphere_Zago2017	Non-dominant	TYP_MILD
199	D	Class_HFLI_PROD_Mazoyer2014	Ambilateral	TYP_MILD
199	D	Classif_MMHC	TYP_MILD	TYP_MILD
199	D	Group_SVM_LeftHemisphere_Zago2017	Dominant	TYP_MILD
199	D	Group_SVM_RightHemisphere_Zago2017	Non-dominant	TYP_MILD
200	D	Class_HFLI_PROD_Mazoyer2014	Typical	TYP_STRONG
200	D	Classif_MMHC	TYP_STRONG	TYP_STRONG
200	D	Group_SVM_LeftHemisphere_Zago2017	Dominant	TYP_STRONG
200	D	Group_SVM_RightHemisphere_Zago2017	Non-dominant	TYP_STRONG
201	D	Class_HFLI_PROD_Mazoyer2014	Typical	TYP_MILD
201	D	Classif_MMHC	TYP_MILD	TYP_MILD
201	D	Group_SVM_LeftHemisphere_Zago2017	Dominant	TYP_MILD
201	D	Group_SVM_RightHemisphere_Zago2017	Non-dominant	TYP_MILD
202	D	Class_HFLI_PROD_Mazoyer2014	Typical	TYP_STRONG
202	D	Classif_MMHC	TYP_STRONG	TYP_STRONG
202	D	Group_SVM_LeftHemisphere_Zago2017	Dominant	TYP_STRONG
202	D	Group_SVM_RightHemisphere_Zago2017	Non-dominant	TYP_STRONG
203	D	Class_HFLI_PROD_Mazoyer2014	Typical	TYP_MILD
203	D	Classif_MMHC	TYP_MILD	TYP_MILD
203	D	Group_SVM_LeftHemisphere_Zago2017	Dominant	TYP_MILD
203	D	Group_SVM_RightHemisphere_Zago2017	Non-dominant	TYP_MILD
204	D	Class_HFLI_PROD_Mazoyer2014	Typical	TYP_MILD
204	D	Classif_MMHC	TYP_MILD	TYP_MILD
204	D	Group_SVM_LeftHemisphere_Zago2017	Dominant	TYP_MILD
204	D	Group_SVM_RightHemisphere_Zago2017	Non-dominant	TYP_MILD
205	D	Class_HFLI_PROD_Mazoyer2014	Typical	TYP_STRONG
205	D	Classif_MMHC	TYP_STRONG	TYP_STRONG
205	D	Group_SVM_LeftHemisphere_Zago2017	Dominant	TYP_STRONG
205	D	Group_SVM_RightHemisphere_Zago2017	Non-dominant	TYP_STRONG
206	D	Class_HFLI_PROD_Mazoyer2014	Typical	TYP_STRONG
206	D	Classif_MMHC	TYP_STRONG	TYP_STRONG
206	D	Group_SVM_LeftHemisphere_Zago2017	Dominant	TYP_STRONG
206	D	Group_SVM_RightHemisphere_Zago2017	Non-dominant	TYP_STRONG
207	D	Class_HFLI_PROD_Mazoyer2014	Typical	TYP_STRONG
207	D	Classif_MMHC	TYP_STRONG	TYP_STRONG
207	D	Group_SVM_LeftHemisphere_Zago2017	Dominant	TYP_STRONG
207	D	Group_SVM_RightHemisphere_Zago2017	Non-dominant	TYP_STRONG
208	D	Class_HFLI_PROD_Mazoyer2014	Typical	TYP_STRONG
208	D	Classif_MMHC	TYP_STRONG	TYP_STRONG
208	D	Group_SVM_LeftHemisphere_Zago2017	Dominant	TYP_STRONG
208	D	Group_SVM_RightHemisphere_Zago2017	Non-dominant	TYP_STRONG
209	G	Class_HFLI_PROD_Mazoyer2014	Typical	TYP_MILD
209	G	Classif_MMHC	TYP_MILD	TYP_MILD
209	G	Group_SVM_LeftHemisphere_Zago2017	Dominant	TYP_MILD
209	G	Group_SVM_RightHemisphere_Zago2017	Non-dominant	TYP_MILD
210	D	Class_HFLI_PROD_Mazoyer2014	Typical	TYP_MILD
210	D	Classif_MMHC	TYP_MILD	TYP_MILD
210	D	Group_SVM_LeftHemisphere_Zago2017	Dominant	TYP_MILD
210	D	Group_SVM_RightHemisphere_Zago2017	Non-dominant	TYP_MILD
211	D	Class_HFLI_PROD_Mazoyer2014	Typical	TYP_STRONG
211	D	Classif_MMHC	TYP_STRONG	TYP_STRONG
211	D	Group_SVM_LeftHemisphere_Zago2017	Dominant	TYP_STRONG
211	D	Group_SVM_RightHemisphere_Zago2017	Non-dominant	TYP_STRONG
212	D	Class_HFLI_PROD_Mazoyer2014	Typical	TYP_STRONG
212	D	Classif_MMHC	TYP_STRONG	TYP_STRONG
212	D	Group_SVM_LeftHemisphere_Zago2017	Dominant	TYP_STRONG
212	D	Group_SVM_RightHemisphere_Zago2017	Non-dominant	TYP_STRONG
213	D	Class_HFLI_PROD_Mazoyer2014	Typical	TYP_MILD
213	D	Classif_MMHC	TYP_MILD	TYP_MILD
213	D	Group_SVM_LeftHemisphere_Zago2017	Dominant	TYP_MILD
213	D	Group_SVM_RightHemisphere_Zago2017	Non-dominant	TYP_MILD
214	D	Class_HFLI_PROD_Mazoyer2014	Typical	ATYP
214	D	Classif_MMHC	ATYP	ATYP
214	D	Group_SVM_LeftHemisphere_Zago2017	Dominant	ATYP
214	D	Group_SVM_RightHemisphere_Zago2017	Non-dominant	ATYP
215	D	Class_HFLI_PROD_Mazoyer2014	Typical	TYP_STRONG
215	D	Classif_MMHC	TYP_STRONG	TYP_STRONG
215	D	Group_SVM_LeftHemisphere_Zago2017	Dominant	TYP_STRONG
215	D	Group_SVM_RightHemisphere_Zago2017	Non-dominant	TYP_STRONG
216	D	Class_HFLI_PROD_Mazoyer2014	Typical	TYP_STRONG
216	D	Classif_MMHC	TYP_STRONG	TYP_STRONG
216	D	Group_SVM_LeftHemisphere_Zago2017	Dominant	TYP_STRONG
216	D	Group_SVM_RightHemisphere_Zago2017	Non-dominant	TYP_STRONG
217	D	Class_HFLI_PROD_Mazoyer2014	Typical	TYP_STRONG
217	D	Classif_MMHC	TYP_STRONG	TYP_STRONG
217	D	Group_SVM_LeftHemisphere_Zago2017	Dominant	TYP_STRONG
217	D	Group_SVM_RightHemisphere_Zago2017	Non-dominant	TYP_STRONG
218	G	Class_HFLI_PROD_Mazoyer2014	Ambilateral	ATYP
218	G	Classif_MMHC	ATYP	ATYP
218	G	Group_SVM_LeftHemisphere_Zago2017	Non-dominant	ATYP
218	G	Group_SVM_RightHemisphere_Zago2017	Non-dominant	ATYP
219	D	Class_HFLI_PROD_Mazoyer2014	Typical	TYP_MILD
219	D	Classif_MMHC	TYP_MILD	TYP_MILD
219	D	Group_SVM_LeftHemisphere_Zago2017	Dominant	TYP_MILD
219	D	Group_SVM_RightHemisphere_Zago2017	Non-dominant	TYP_MILD
220	D	Class_HFLI_PROD_Mazoyer2014	Typical	TYP_STRONG
220	D	Classif_MMHC	TYP_STRONG	TYP_STRONG
220	D	Group_SVM_LeftHemisphere_Zago2017	Dominant	TYP_STRONG
220	D	Group_SVM_RightHemisphere_Zago2017	Non-dominant	TYP_STRONG
221	D	Class_HFLI_PROD_Mazoyer2014	Typical	TYP_STRONG
221	D	Classif_MMHC	TYP_STRONG	TYP_STRONG
221	D	Group_SVM_LeftHemisphere_Zago2017	Dominant	TYP_STRONG
221	D	Group_SVM_RightHemisphere_Zago2017	Non-dominant	TYP_STRONG
222	D	Class_HFLI_PROD_Mazoyer2014	Typical	TYP_STRONG
222	D	Classif_MMHC	TYP_STRONG	TYP_STRONG
222	D	Group_SVM_LeftHemisphere_Zago2017	Dominant	TYP_STRONG
222	D	Group_SVM_RightHemisphere_Zago2017	Non-dominant	TYP_STRONG
223	D	Class_HFLI_PROD_Mazoyer2014	Typical	TYP_MILD
223	D	Classif_MMHC	TYP_MILD	TYP_MILD
223	D	Group_SVM_LeftHemisphere_Zago2017	Dominant	TYP_MILD
223	D	Group_SVM_RightHemisphere_Zago2017	Non-dominant	TYP_MILD
224	D	Class_HFLI_PROD_Mazoyer2014	Typical	TYP_MILD
224	D	Classif_MMHC	TYP_MILD	TYP_MILD
224	D	Group_SVM_LeftHemisphere_Zago2017	Dominant	TYP_MILD
224	D	Group_SVM_RightHemisphere_Zago2017	Non-dominant	TYP_MILD
225	D	Class_HFLI_PROD_Mazoyer2014	Typical	TYP_STRONG
225	D	Classif_MMHC	TYP_STRONG	TYP_STRONG
225	D	Group_SVM_LeftHemisphere_Zago2017	Dominant	TYP_STRONG
225	D	Group_SVM_RightHemisphere_Zago2017	Non-dominant	TYP_STRONG
226	D	Class_HFLI_PROD_Mazoyer2014	Typical	TYP_MILD
226	D	Classif_MMHC	TYP_MILD	TYP_MILD
226	D	Group_SVM_LeftHemisphere_Zago2017	Dominant	TYP_MILD
226	D	Group_SVM_RightHemisphere_Zago2017	Non-dominant	TYP_MILD
227	D	Class_HFLI_PROD_Mazoyer2014	Typical	TYP_MILD
227	D	Classif_MMHC	TYP_MILD	TYP_MILD
227	D	Group_SVM_LeftHemisphere_Zago2017	Dominant	TYP_MILD
227	D	Group_SVM_RightHemisphere_Zago2017	Non-dominant	TYP_MILD
228	D	Class_HFLI_PROD_Mazoyer2014	Typical	TYP_MILD
228	D	Classif_MMHC	TYP_MILD	TYP_MILD
228	D	Group_SVM_LeftHemisphere_Zago2017	Dominant	TYP_MILD
228	D	Group_SVM_RightHemisphere_Zago2017	Non-dominant	TYP_MILD
229	D	Class_HFLI_PROD_Mazoyer2014	Typical	TYP_STRONG
229	D	Classif_MMHC	TYP_STRONG	TYP_STRONG
229	D	Group_SVM_LeftHemisphere_Zago2017	Dominant	TYP_STRONG
229	D	Group_SVM_RightHemisphere_Zago2017	Non-dominant	TYP_STRONG
230	D	Class_HFLI_PROD_Mazoyer2014	Typical	TYP_STRONG
230	D	Classif_MMHC	TYP_STRONG	TYP_STRONG
230	D	Group_SVM_LeftHemisphere_Zago2017	Dominant	TYP_STRONG
230	D	Group_SVM_RightHemisphere_Zago2017	Non-dominant	TYP_STRONG
231	D	Class_HFLI_PROD_Mazoyer2014	Typical	TYP_STRONG
231	D	Classif_MMHC	TYP_STRONG	TYP_STRONG
231	D	Group_SVM_LeftHemisphere_Zago2017	Dominant	TYP_STRONG
231	D	Group_SVM_RightHemisphere_Zago2017	Non-dominant	TYP_STRONG
232	D	Class_HFLI_PROD_Mazoyer2014	Typical	TYP_STRONG
232	D	Classif_MMHC	TYP_STRONG	TYP_STRONG
232	D	Group_SVM_LeftHemisphere_Zago2017	Dominant	TYP_STRONG
232	D	Group_SVM_RightHemisphere_Zago2017	Non-dominant	TYP_STRONG
233	D	Class_HFLI_PROD_Mazoyer2014	Typical	TYP_STRONG
233	D	Classif_MMHC	TYP_STRONG	TYP_STRONG
233	D	Group_SVM_LeftHemisphere_Zago2017	Dominant	TYP_STRONG
233	D	Group_SVM_RightHemisphere_Zago2017	Non-dominant	TYP_STRONG
234	D	Class_HFLI_PROD_Mazoyer2014	Typical	TYP_MILD
234	D	Classif_MMHC	TYP_MILD	TYP_MILD
234	D	Group_SVM_LeftHemisphere_Zago2017	Dominant	TYP_MILD
234	D	Group_SVM_RightHemisphere_Zago2017	Non-dominant	TYP_MILD
235	D	Class_HFLI_PROD_Mazoyer2014	Typical	TYP_STRONG
235	D	Classif_MMHC	TYP_STRONG	TYP_STRONG
235	D	Group_SVM_LeftHemisphere_Zago2017	Dominant	TYP_STRONG
235	D	Group_SVM_RightHemisphere_Zago2017	Non-dominant	TYP_STRONG
236	D	Class_HFLI_PROD_Mazoyer2014	Typical	TYP_STRONG
236	D	Classif_MMHC	TYP_STRONG	TYP_STRONG
236	D	Group_SVM_LeftHemisphere_Zago2017	Dominant	TYP_STRONG
236	D	Group_SVM_RightHemisphere_Zago2017	Non-dominant	TYP_STRONG
237	D	Class_HFLI_PROD_Mazoyer2014	Typical	TYP_MILD
237	D	Classif_MMHC	TYP_MILD	TYP_MILD
237	D	Group_SVM_LeftHemisphere_Zago2017	Dominant	TYP_MILD
237	D	Group_SVM_RightHemisphere_Zago2017	Non-dominant	TYP_MILD
238	G	Class_HFLI_PROD_Mazoyer2014	Typical	TYP_STRONG
238	G	Classif_MMHC	TYP_STRONG	TYP_STRONG
238	G	Group_SVM_LeftHemisphere_Zago2017	Dominant	TYP_STRONG
238	G	Group_SVM_RightHemisphere_Zago2017	Non-dominant	TYP_STRONG
239	G	Class_HFLI_PROD_Mazoyer2014	Typical	TYP_STRONG
239	G	Classif_MMHC	TYP_STRONG	TYP_STRONG
239	G	Group_SVM_LeftHemisphere_Zago2017	Dominant	TYP_STRONG
239	G	Group_SVM_RightHemisphere_Zago2017	Non-dominant	TYP_STRONG
240	G	Class_HFLI_PROD_Mazoyer2014	Typical	TYP_MILD
240	G	Classif_MMHC	TYP_MILD	TYP_MILD
240	G	Group_SVM_LeftHemisphere_Zago2017	Dominant	TYP_MILD
240	G	Group_SVM_RightHemisphere_Zago2017	Non-dominant	TYP_MILD
241	G	Class_HFLI_PROD_Mazoyer2014	Typical	TYP_STRONG
241	G	Classif_MMHC	TYP_STRONG	TYP_STRONG
241	G	Group_SVM_LeftHemisphere_Zago2017	Dominant	TYP_STRONG
241	G	Group_SVM_RightHemisphere_Zago2017	Non-dominant	TYP_STRONG
242	G	Class_HFLI_PROD_Mazoyer2014	Typical	TYP_MILD
242	G	Classif_MMHC	TYP_MILD	TYP_MILD
242	G	Group_SVM_LeftHemisphere_Zago2017	Dominant	TYP_MILD
242	G	Group_SVM_RightHemisphere_Zago2017	Non-dominant	TYP_MILD
243	D	Class_HFLI_PROD_Mazoyer2014	Typical	TYP_MILD
243	D	Classif_MMHC	TYP_MILD	TYP_MILD
243	D	Group_SVM_LeftHemisphere_Zago2017	Dominant	TYP_MILD
243	D	Group_SVM_RightHemisphere_Zago2017	Non-dominant	TYP_MILD
244	G	Class_HFLI_PROD_Mazoyer2014	Typical	TYP_MILD
244	G	Classif_MMHC	TYP_MILD	TYP_MILD
244	G	Group_SVM_LeftHemisphere_Zago2017	Dominant	TYP_MILD
244	G	Group_SVM_RightHemisphere_Zago2017	Non-dominant	TYP_MILD
245	D	Class_HFLI_PROD_Mazoyer2014	Typical	TYP_STRONG
245	D	Classif_MMHC	TYP_STRONG	TYP_STRONG
245	D	Group_SVM_LeftHemisphere_Zago2017	Dominant	TYP_STRONG
245	D	Group_SVM_RightHemisphere_Zago2017	Non-dominant	TYP_STRONG
246	G	Class_HFLI_PROD_Mazoyer2014	Ambilateral	TYP_MILD
246	G	Classif_MMHC	TYP_MILD	TYP_MILD
246	G	Group_SVM_LeftHemisphere_Zago2017	Dominant	TYP_MILD
246	G	Group_SVM_RightHemisphere_Zago2017	Non-dominant	TYP_MILD
247	D	Class_HFLI_PROD_Mazoyer2014	Ambilateral	TYP_STRONG
247	D	Classif_MMHC	TYP_STRONG	TYP_STRONG
247	D	Group_SVM_LeftHemisphere_Zago2017	Dominant	TYP_STRONG
247	D	Group_SVM_RightHemisphere_Zago2017	Dominant	TYP_STRONG
248	D	Class_HFLI_PROD_Mazoyer2014	Typical	TYP_STRONG
248	D	Classif_MMHC	TYP_STRONG	TYP_STRONG
248	D	Group_SVM_LeftHemisphere_Zago2017	Dominant	TYP_STRONG
248	D	Group_SVM_RightHemisphere_Zago2017	Non-dominant	TYP_STRONG
249	D	Class_HFLI_PROD_Mazoyer2014	Ambilateral	TYP_MILD
249	D	Classif_MMHC	TYP_MILD	TYP_MILD
249	D	Group_SVM_LeftHemisphere_Zago2017	Dominant	TYP_MILD
249	D	Group_SVM_RightHemisphere_Zago2017	Dominant	TYP_MILD
250	D	Class_HFLI_PROD_Mazoyer2014	Typical	TYP_STRONG
250	D	Classif_MMHC	TYP_STRONG	TYP_STRONG
250	D	Group_SVM_LeftHemisphere_Zago2017	Dominant	TYP_STRONG
250	D	Group_SVM_RightHemisphere_Zago2017	Non-dominant	TYP_STRONG
251	D	Class_HFLI_PROD_Mazoyer2014	Typical	TYP_MILD
251	D	Classif_MMHC	TYP_MILD	TYP_MILD
251	D	Group_SVM_LeftHemisphere_Zago2017	Dominant	TYP_MILD
251	D	Group_SVM_RightHemisphere_Zago2017	Non-dominant	TYP_MILD
252	D	Class_HFLI_PROD_Mazoyer2014	Ambilateral	TYP_STRONG
252	D	Classif_MMHC	TYP_STRONG	TYP_STRONG
252	D	Group_SVM_LeftHemisphere_Zago2017	Dominant	TYP_STRONG
252	D	Group_SVM_RightHemisphere_Zago2017	Non-dominant	TYP_STRONG
253	G	Class_HFLI_PROD_Mazoyer2014	Typical	TYP_STRONG
253	G	Classif_MMHC	TYP_STRONG	TYP_STRONG
253	G	Group_SVM_LeftHemisphere_Zago2017	Dominant	TYP_STRONG
253	G	Group_SVM_RightHemisphere_Zago2017	Non-dominant	TYP_STRONG
254	G	Class_HFLI_PROD_Mazoyer2014	Typical	TYP_STRONG
254	G	Classif_MMHC	TYP_STRONG	TYP_STRONG
254	G	Group_SVM_LeftHemisphere_Zago2017	Dominant	TYP_STRONG
254	G	Group_SVM_RightHemisphere_Zago2017	Non-dominant	TYP_STRONG
255	D	Class_HFLI_PROD_Mazoyer2014	Typical	TYP_MILD
255	D	Classif_MMHC	TYP_MILD	TYP_MILD
255	D	Group_SVM_LeftHemisphere_Zago2017	Dominant	TYP_MILD
255	D	Group_SVM_RightHemisphere_Zago2017	Non-dominant	TYP_MILD
256	G	Class_HFLI_PROD_Mazoyer2014	Typical	TYP_STRONG
256	G	Classif_MMHC	TYP_STRONG	TYP_STRONG
256	G	Group_SVM_LeftHemisphere_Zago2017	Dominant	TYP_STRONG
256	G	Group_SVM_RightHemisphere_Zago2017	Non-dominant	TYP_STRONG
257	D	Class_HFLI_PROD_Mazoyer2014	Typical	TYP_MILD
257	D	Classif_MMHC	TYP_MILD	TYP_MILD
257	D	Group_SVM_LeftHemisphere_Zago2017	Dominant	TYP_MILD
257	D	Group_SVM_RightHemisphere_Zago2017	Non-dominant	TYP_MILD
258	G	Class_HFLI_PROD_Mazoyer2014	Ambilateral	ATYP
258	G	Classif_MMHC	ATYP	ATYP
258	G	Group_SVM_LeftHemisphere_Zago2017	Non-dominant	ATYP
258	G	Group_SVM_RightHemisphere_Zago2017	Dominant	ATYP
259	G	Class_HFLI_PROD_Mazoyer2014	Ambilateral	TYP_MILD
259	G	Classif_MMHC	TYP_MILD	TYP_MILD
259	G	Group_SVM_LeftHemisphere_Zago2017	Dominant	TYP_MILD
259	G	Group_SVM_RightHemisphere_Zago2017	Non-dominant	TYP_MILD
260	G	Class_HFLI_PROD_Mazoyer2014	Typical	TYP_MILD
260	G	Classif_MMHC	TYP_MILD	TYP_MILD
260	G	Group_SVM_LeftHemisphere_Zago2017	Dominant	TYP_MILD
260	G	Group_SVM_RightHemisphere_Zago2017	Non-dominant	TYP_MILD
261	G	Class_HFLI_PROD_Mazoyer2014	Strong-atypical	ATYP
261	G	Classif_MMHC	ATYP	ATYP
261	G	Group_SVM_LeftHemisphere_Zago2017	Non-dominant	ATYP
261	G	Group_SVM_RightHemisphere_Zago2017	Dominant	ATYP
262	D	Class_HFLI_PROD_Mazoyer2014	Typical	TYP_STRONG
262	D	Classif_MMHC	TYP_STRONG	TYP_STRONG
262	D	Group_SVM_LeftHemisphere_Zago2017	Dominant	TYP_STRONG
262	D	Group_SVM_RightHemisphere_Zago2017	Non-dominant	TYP_STRONG
263	D	Class_HFLI_PROD_Mazoyer2014	Typical	TYP_STRONG
263	D	Classif_MMHC	TYP_STRONG	TYP_STRONG
263	D	Group_SVM_LeftHemisphere_Zago2017	Dominant	TYP_STRONG
263	D	Group_SVM_RightHemisphere_Zago2017	Non-dominant	TYP_STRONG
264	G	Class_HFLI_PROD_Mazoyer2014	Strong-atypical	ATYP
264	G	Classif_MMHC	ATYP	ATYP
264	G	Group_SVM_LeftHemisphere_Zago2017	Non-dominant	ATYP
264	G	Group_SVM_RightHemisphere_Zago2017	Dominant	ATYP
265	D	Class_HFLI_PROD_Mazoyer2014	Typical	TYP_STRONG
265	D	Classif_MMHC	TYP_STRONG	TYP_STRONG
265	D	Group_SVM_LeftHemisphere_Zago2017	Dominant	TYP_STRONG
265	D	Group_SVM_RightHemisphere_Zago2017	Non-dominant	TYP_STRONG
266	G	Class_HFLI_PROD_Mazoyer2014	Typical	TYP_MILD
266	G	Classif_MMHC	TYP_MILD	TYP_MILD
266	G	Group_SVM_LeftHemisphere_Zago2017	Dominant	TYP_MILD
266	G	Group_SVM_RightHemisphere_Zago2017	Non-dominant	TYP_MILD
267	D	Class_HFLI_PROD_Mazoyer2014	Typical	TYP_STRONG
267	D	Classif_MMHC	TYP_STRONG	TYP_STRONG
267	D	Group_SVM_LeftHemisphere_Zago2017	Dominant	TYP_STRONG
267	D	Group_SVM_RightHemisphere_Zago2017	Non-dominant	TYP_STRONG
268	G	Class_HFLI_PROD_Mazoyer2014	Typical	TYP_STRONG
268	G	Classif_MMHC	TYP_STRONG	TYP_STRONG
268	G	Group_SVM_LeftHemisphere_Zago2017	Dominant	TYP_STRONG
268	G	Group_SVM_RightHemisphere_Zago2017	Non-dominant	TYP_STRONG
269	G	Class_HFLI_PROD_Mazoyer2014	Typical	TYP_MILD
269	G	Classif_MMHC	TYP_MILD	TYP_MILD
269	G	Group_SVM_LeftHemisphere_Zago2017	Dominant	TYP_MILD
269	G	Group_SVM_RightHemisphere_Zago2017	Non-dominant	TYP_MILD
270	D	Class_HFLI_PROD_Mazoyer2014	Typical	TYP_STRONG
270	D	Classif_MMHC	TYP_STRONG	TYP_STRONG
270	D	Group_SVM_LeftHemisphere_Zago2017	Dominant	TYP_STRONG
270	D	Group_SVM_RightHemisphere_Zago2017	Non-dominant	TYP_STRONG
271	D	Class_HFLI_PROD_Mazoyer2014	Typical	TYP_STRONG
271	D	Classif_MMHC	TYP_STRONG	TYP_STRONG
271	D	Group_SVM_LeftHemisphere_Zago2017	Dominant	TYP_STRONG
271	D	Group_SVM_RightHemisphere_Zago2017	Non-dominant	TYP_STRONG
272	G	Class_HFLI_PROD_Mazoyer2014	Typical	TYP_STRONG
272	G	Classif_MMHC	TYP_STRONG	TYP_STRONG
272	G	Group_SVM_LeftHemisphere_Zago2017	Dominant	TYP_STRONG
272	G	Group_SVM_RightHemisphere_Zago2017	Non-dominant	TYP_STRONG
273	D	Class_HFLI_PROD_Mazoyer2014	Typical	TYP_MILD
273	D	Classif_MMHC	TYP_MILD	TYP_MILD
273	D	Group_SVM_LeftHemisphere_Zago2017	Dominant	TYP_MILD
273	D	Group_SVM_RightHemisphere_Zago2017	Non-dominant	TYP_MILD
274	D	Class_HFLI_PROD_Mazoyer2014	Typical	TYP_STRONG
274	D	Classif_MMHC	TYP_STRONG	TYP_STRONG
274	D	Group_SVM_LeftHemisphere_Zago2017	Dominant	TYP_STRONG
274	D	Group_SVM_RightHemisphere_Zago2017	Non-dominant	TYP_STRONG
275	D	Class_HFLI_PROD_Mazoyer2014	Typical	TYP_STRONG
275	D	Classif_MMHC	TYP_STRONG	TYP_STRONG
275	D	Group_SVM_LeftHemisphere_Zago2017	Dominant	TYP_STRONG
275	D	Group_SVM_RightHemisphere_Zago2017	Non-dominant	TYP_STRONG
276	G	Class_HFLI_PROD_Mazoyer2014	Typical	TYP_MILD
276	G	Classif_MMHC	TYP_MILD	TYP_MILD
276	G	Group_SVM_LeftHemisphere_Zago2017	Dominant	TYP_MILD
276	G	Group_SVM_RightHemisphere_Zago2017	Dominant	TYP_MILD
277	G	Class_HFLI_PROD_Mazoyer2014	Typical	TYP_MILD
277	G	Classif_MMHC	TYP_MILD	TYP_MILD
277	G	Group_SVM_LeftHemisphere_Zago2017	Dominant	TYP_MILD
277	G	Group_SVM_RightHemisphere_Zago2017	Non-dominant	TYP_MILD
278	G	Class_HFLI_PROD_Mazoyer2014	Typical	TYP_MILD
278	G	Classif_MMHC	TYP_MILD	TYP_MILD
278	G	Group_SVM_LeftHemisphere_Zago2017	Dominant	TYP_MILD
278	G	Group_SVM_RightHemisphere_Zago2017	Non-dominant	TYP_MILD
279	D	Class_HFLI_PROD_Mazoyer2014	Typical	TYP_STRONG
279	D	Classif_MMHC	TYP_STRONG	TYP_STRONG
279	D	Group_SVM_LeftHemisphere_Zago2017	Dominant	TYP_STRONG
279	D	Group_SVM_RightHemisphere_Zago2017	Non-dominant	TYP_STRONG
280	G	Class_HFLI_PROD_Mazoyer2014	Typical	TYP_STRONG
280	G	Classif_MMHC	TYP_STRONG	TYP_STRONG
280	G	Group_SVM_LeftHemisphere_Zago2017	Dominant	TYP_STRONG
280	G	Group_SVM_RightHemisphere_Zago2017	Non-dominant	TYP_STRONG
281	G	Class_HFLI_PROD_Mazoyer2014	Typical	TYP_MILD
281	G	Classif_MMHC	TYP_MILD	TYP_MILD
281	G	Group_SVM_LeftHemisphere_Zago2017	Dominant	TYP_MILD
281	G	Group_SVM_RightHemisphere_Zago2017	Non-dominant	TYP_MILD
282	D	Class_HFLI_PROD_Mazoyer2014	Typical	TYP_MILD
282	D	Classif_MMHC	TYP_MILD	TYP_MILD
282	D	Group_SVM_LeftHemisphere_Zago2017	Dominant	TYP_MILD
282	D	Group_SVM_RightHemisphere_Zago2017	Non-dominant	TYP_MILD
283	D	Class_HFLI_PROD_Mazoyer2014	Typical	TYP_STRONG
283	D	Classif_MMHC	TYP_STRONG	TYP_STRONG
283	D	Group_SVM_LeftHemisphere_Zago2017	Dominant	TYP_STRONG
283	D	Group_SVM_RightHemisphere_Zago2017	Non-dominant	TYP_STRONG
284	G	Class_HFLI_PROD_Mazoyer2014	Typical	TYP_STRONG
284	G	Classif_MMHC	TYP_STRONG	TYP_STRONG
284	G	Group_SVM_LeftHemisphere_Zago2017	Dominant	TYP_STRONG
284	G	Group_SVM_RightHemisphere_Zago2017	Non-dominant	TYP_STRONG
285	D	Class_HFLI_PROD_Mazoyer2014	Typical	TYP_STRONG
285	D	Classif_MMHC	TYP_STRONG	TYP_STRONG
285	D	Group_SVM_LeftHemisphere_Zago2017	Dominant	TYP_STRONG
285	D	Group_SVM_RightHemisphere_Zago2017	Non-dominant	TYP_STRONG
286	G	Class_HFLI_PROD_Mazoyer2014	Typical	ATYP
286	G	Classif_MMHC	ATYP	ATYP
286	G	Group_SVM_LeftHemisphere_Zago2017	Dominant	ATYP
286	G	Group_SVM_RightHemisphere_Zago2017	Non-dominant	ATYP
287	D	Class_HFLI_PROD_Mazoyer2014	Typical	TYP_MILD
287	D	Classif_MMHC	TYP_MILD	TYP_MILD
287	D	Group_SVM_LeftHemisphere_Zago2017	Dominant	TYP_MILD
287	D	Group_SVM_RightHemisphere_Zago2017	Non-dominant	TYP_MILD
