# Supplementary material for: Typical and atypical language brain organization based on intrinsic connectivity and multitask functional asymmetries
Source: eLife journal article supplement (doi:10.7554/elife.58722), 2020-10-16
Supplement: supp [file elife-58722-supp-v1.zip › elife_poa_e58722_Figure_6_source_data_2.txt]

Variable_Name,Informations
ID,Participants identifier.
MP,"Self-reported handedness of the participants. RH for right-handers, LH for left-handers."
Variable,"Indicates the classification used to categorize participants. « Class_HFLI_PROD_Mazoyer2014 » is the Gaussian Mixture Modeling (GMM) classification on the HFLI obtained with the production (sentence minus word Contrast ; Mazoyer et al., 2014). Three groups are obtained: Typical (TYP), Ambilateral (AMB) and Strontgly-atypical (SA). « Classif_MMHC » is the Multitask Multimodal Hierarchical Classification (MMHC) classification used in the paper. Hierarchical classification based both on language task-induced asymmetries and on resting-state organization within the SENT_CORE network (described in Labache et al. 2019). The agglomerative hierarchical procedure resulted in the identification of 3 clusters. We will refer to these clusters as groups varying in their «language organization»: TYP_STRONG, TYP_MILD and ATYP. « Group_SVM_LeftHemisphere_Zago2017 » and « Group_SVM_RightHemisphere_Zago2017 » are the Support Vector Machine (SVM) classification applied at the voxel level, allowing us to classify the dominant and nondominant hemispheres of each participant according to their spatial pattern of activation during production (sentence minus word contrast ; Zago et al., 2017)."
Group,Participant group according to Variable column.
Classif_MMHC,"Multitask Multimodal Hierarchical Classification (MMHC) classification used in the paper. Hierarchical classification based both on language task-induced asymmetries and on resting-state organization within the SENT_CORE network (described in Labache et al. 2019). The agglomerative hierarchical procedure resulted in the identification of 3 clusters. We will refer to these clusters as groups varying in their «language organization»: TYP_STRONG, TYP_MILD and ATYP."
