# Supplementary material for: Typical and atypical language brain organization based on intrinsic connectivity and multitask functional asymmetries
Source: eLife journal article supplement (doi:10.7554/elife.58722), 2020-10-16
Supplement: supp [file elife-58722-supp-v1.zip › elife_poa_e58722_Table_1_source_data_1.txt]

Variable	TYP_STRONG_mean	TYP_STRONG_sd	TYP_MILD_mean	TYP_MILD_sd	ATYP_mean	ATYP_sd
sentCORE_PROD_Asym	0.557	0.17	0.296	0.12	-0.114	0.2
sentCORE_LISN_Asym	0.299	0.13	0.167	0.09	-0.155	0.17
sentCORE_READ_Asym	0.351	0.18	0.217	0.14	-0.177	0.15
sentHUBS_PROD_Asym	0.804	0.23	0.391	0.18	-0.119	0.31
sentHUBS_LISN_Asym	0.429	0.19	0.21	0.15	-0.292	0.28
sentHUBS_READ_Asym	0.515	0.3	0.287	0.23	-0.358	0.3
sentCORE_PROD_Asym_Abs	0.557	0.17	0.296	0.12	0.19	0.12
sentCORE_LISN_Asym_Abs	0.3	0.12	0.168	0.09	0.169	0.15
sentCORE_READ_Asym_Abs	0.351	0.18	0.221	0.13	0.19	0.13
sentHUBS_PROD_Asym_Abs	0.804	0.23	0.394	0.17	0.25	0.21
sentHUBS_LISN_Asym_Abs	0.43	0.19	0.214	0.14	0.318	0.25
sentHUBS_READ_Asym_Abs	0.515	0.3	0.308	0.2	0.371	0.29
Rs_mIHHC	0.571	0.07	0.588	0.07	0.611	0.07
mean_Rs_DC	4.335	0.71	3.974	0.62	4.73	0.8
Rs_DC_Asymmetry	0.5	0.78	0.477	0.64	-0.167	0.78
