# Supplementary material for: Typical and atypical language brain organization based on intrinsic connectivity and multitask functional asymmetries
Source: eLife journal article supplement (doi:10.7554/elife.58722), 2020-10-16
Supplement: supp [file elife-58722-supp-v1.zip › elife_poa_e58722_Table_1_source_data_2.txt]

Variable_Name,Informations
Variable,"Variables that served at the classification and also absolute values (Abs) of tasks-induced asymmetries. Asymmetries (Asym) in sent core network (sentCORE) and its hubs (sentHUBS) for the production (PROD), the listening (LISN) and the reading (READ) tasks. Rs_mIHHC stands for the mean Resting-state InterHemispheric Homotopic Pearson Correlation coefficient of SENT_CORE network. mean_Rs_DC stands for the mean Resting-state Degree Centrality of the left and right hemisphere for SENT_CORE network. Rs_DC_Asymmetry stands for the resting-state Degree Centrality asymmetry (left minus right DC) for SENT_CORE network."
TYP_STRONG_mean,Average values of TYP_STRONG particpants for the corresponding Variable.
TYP_STRONG_sd,Standard-deviation of the mean for the corresponding Variable in TYP_STRONG.
TYP_MILD_mean,Average values of TYP_MILD particpants for the corresponding Variable.
TYP_MILD_sd,Standard-deviation of the mean for the corresponding Variable in TYP_MILD.
ATYP_mean,Average values of ATYP particpants for the corresponding Variable.
ATYP_sd,Standard-deviation of the mean for the corresponding Variable in ATYP.
