# Supplementary material for: Typical and atypical language brain organization based on intrinsic connectivity and multitask functional asymmetries
Source: eLife journal article supplement (doi:10.7554/elife.58722), 2020-10-16
Supplement: supp [file elife-58722-supp-v1.zip › elife_poa_e58722_Table_2_source_data_1.txt]

Mesures_tasks_execution	TYP_STRONG_mean	TYP_STRONG_sd	TYP_MILD_mean	TYP_MILD_sd	ATYP_mean	ATYP_sd
LISN_difficulty	1.12	0.4	1.14	0.45	1.25	0.8
READ_difficulty	1.17	0.4	1.23	0.55	1.2	0.43
PROD_difficulty	2.74	1.07	2.69	1.06	2.88	1.1
ResponseTime_LISN	388.8	134	386.3	126	396.9	96
ResponseTime_READ	3733.3	579	3731.8	560	3755.8	552
ResponseTime_PROD	5600	850	5631.2	968	5645.5	1095.59
PRODsent_Nwords	12.36	2.03	12.37	1.87	12.36	2.55
