# Supplementary material for: Typical and atypical language brain organization based on intrinsic connectivity and multitask functional asymmetries
Source: eLife journal article supplement (doi:10.7554/elife.58722), 2020-10-16
Supplement: supp [file elife-58722-supp-v1.zip › elife_poa_e58722_Table_2_source_data_2.txt]

Variable_Name,Informations
Mesures_tasks_execution,"Measures related to tasks execution in the 3 groups. Self-report of task difficulty in provided in a 1-5 scale and was rated for each run (Sentence production: PROD, sentence listening: LSN, sentences reading: READ). Specific to PROD is the mean number of words per sentence (sent) produced."
TYP_STRONG_mean,Average values of TYP_STRONG particpants for the corresponding Variable.
TYP_STRONG_sd,Standard-deviation of the mean for the corresponding Variable in TYP_STRONG.
TYP_MILD_mean,Average values of TYP_MILD particpants for the corresponding Variable.
TYP_MILD_sd,Standard-deviation of the mean for the corresponding Variable in TYP_MILD.
ATYP_mean,Average values of ATYP particpants for the corresponding Variable.
ATYP_sd,Standard-deviation of the mean for the corresponding Variable in ATYP.
