# Supplementary material for: Typical and atypical language brain organization based on intrinsic connectivity and multitask functional asymmetries
Source: eLife journal article supplement (doi:10.7554/elife.58722), 2020-10-16
Supplement: supp [file elife-58722-supp-v1.zip › elife_poa_e58722_Table_3_source_data_1.txt]

anatomy_measures	TYP_CONGRUENT_mean	TYP_CONGRUENT_sd	TYP_CROSSED_mean	TYP_CROSSED_sd	ATYP_CONGRUENT_mean	ATYP_CONGRUENT_sd	ATYP_CROSSED_mean	ATYP_CROSSED_sd
GM_LeftHemisphere	327	32.63	337.59	47.76	337.42	35.17	317.3	16.59
GM_RightHemisphere	315.64	32.58	325.72	48.5	327.77	33.76	306.48	15.76
GMasym	11.35	4	11.87	4.5	9.65	5.03	10.82	3.82
WM_LeftHemisphere	216.67	26.17	221.92	36.01	222.43	26.14	208.61	15.52
WM_RightHemisphere	213.34	25.45	217.82	35.13	220.22	25.64	206.38	14.56
WMasym	3.33	2.19	4.11	1.74	2.22	2.41	2.23	2.03
CCvol	5.31	0.85	5.21	0.67	5.45	0.9	5.48	0.74
