# Supplementary material for: Typical and atypical language brain organization based on intrinsic connectivity and multitask functional asymmetries
Source: eLife journal article supplement (doi:10.7554/elife.58722), 2020-10-16
Supplement: supp [file elife-58722-supp-v1.zip › elife_poa_e58722_Table_3_source_data_2.txt]

Variable_Name	Informations	Unit
anatomy_measures	Measures related to corpus callosum (CCvol) and to grey (GM) and white matter (WM) mean volumes and asymmetries (defined as Left minus Right) in the 4 analyzed groups.
TYP_CONGRUENT_mean	Average values of TYP_CONGRUENT particpants for the corresponding Variable.	Cubic centimetre
TYP_CONGRUENT_sd	Standard-deviation of the mean for the corresponding Variable in TYP_CONGRUENT.	Cubic centimetre
TYP_CROSSED_mean	Average values of TYP_CROSSED particpants for the corresponding Variable.	Cubic centimetre
TYP_CROSSED_sd	Standard-deviation of the mean for the corresponding Variable in TYP_CROSSED.	Cubic centimetre
ATYP_CONGRUENT_mean	Average values of ATYP_CONGRUENT particpants for the corresponding Variable.	Cubic centimetre
ATYP_CONGRUENT_sd	Standard-deviation of the mean for the corresponding Variable in ATYP_CONGRUENT.	Cubic centimetre
ATYP_CROSSED_mean	Average values of ATYP_CROSSED particpants for the corresponding Variable.	Cubic centimetre
ATYP_CROSSED_sd	Standard-deviation of the mean for the corresponding Variable in ATYP_CROSSED.	Cubic centimetre
