# Supplementary material for: Typical and atypical language brain organization based on intrinsic connectivity and multitask functional asymmetries
Source: eLife journal article supplement (doi:10.7554/elife.58722), 2020-10-16
Supplement: supp [file elife-58722-supp-v1.zip › elife_poa_e58722_Table_4_source_data_1.txt]

Test	TYP_STRONG_mean	TYP_STRONG_sd	TYP_MILD_mean	TYP_MED_sd	ATYP_mean	ATYP_sd
rey	65.98	7.57	65.07	7.51	64.73	7.57
PSM	36.52	10.44	34.64	11.16	34.47	9.68
gen	48.19	9.82	46.55	10.01	47.63	8.85
RSTE	4.07	1.08	3.91	1.11	4.25	1.11
LSTE	4.85	1.06	4.57	1.14	4.63	1.21
voc	28.39	3.78	27.8	3.74	28.07	4.42
rhym	68.38	4.56	67.17	6.11	65.93	5.62
MRT	11.08	4.27	10.7	4.6	10.17	4.63
corsiE	5.99	1.06	5.72	1.04	5.73	0.94
maze	6.68	2.66	6.09	2.32	4.42	2.39
ravenIQ	111.78	9.7	109.82	10.47	106	9.48
