# Supplementary material for: Typical and atypical language brain organization based on intrinsic connectivity and multitask functional asymmetries
Source: eLife journal article supplement (doi:10.7554/elife.58722), 2020-10-16
Supplement: supp [file elife-58722-supp-v1.zip › elife_poa_e58722_Table_4_source_data_2.txt]

Variable_Name,Informations,Unit
Test,"Mean scores at the different tests of the cognitive battery in the 3 groups. RSTE: Reading Span test, empan, max = 6. LSTE: Listening Span test, empan, max = 6. voc: Vocabulary assessment based on the assessement of synomyms among 44 pairs of words, max = 44. gen: Verb generation, score = total number of verbs generated from presentation of 6 common words. rey: Supraspan word list learning (18 words), score = sum of the 5 recall, max = 90. PSM: Supraspan pseudoword list learning (15 pseudo-words), score = sum of the 5 recall, max = 75. rhym: rhyming on 80 pairs of pseudowords (50 don't rhyme), score = N correct answers, max = 80. MRT: Mental Rotation Test on 20 series of 3D images made of cubes, score = N correct answers, max = 20. corsiE: Corsi block test empan, max = 9. maze: composite score. ravenIQ: Raven IQ.",
TYP_STRONG_mean,Average values of TYP_STRONG particpants for the corresponding Variable.,
TYP_STRONG_sd,Standard-deviation of the mean for the corresponding Variable in TYP_STRONG.,
TYP_MILD_mean,Average values of TYP_MILD particpants for the corresponding Variable.,
TYP_MILD_sd,Standard-deviation of the mean for the corresponding Variable in TYP_MILD.,
ATYP_mean,Average values of ATYP particpants for the corresponding Variable.,
ATYP_sd,Standard-deviation of the mean for the corresponding Variable in ATYP.,
